# Supplementary material for: Concurrent Cu(ii)-initiated Fenton-like reaction and glutathione depletion to escalate chemodynamic therapy
Source: Royal Society of Chemistry journal article supplement (doi:10.1039/d3cc04519f), 2023-01-01
Supplement: d3cc04519f1.pdf [file d3cc04519f1.pdf]

## Supporting Information

### Concurrent Cu(II)-initiated Fenton-like Reaction and Glutathione Depletion to Escalate Chemodynamic Therapy

Ashwini Kumar<sup>‡</sup>, Ayushi Chaudhary<sup>‡</sup>, Bhumika Agrahari, Kajal Chaudhary, Pooran Kumar, Ritika Gautam Singh\*

<sup>‡</sup>Department of Chemistry, Indian Institute of Technology Kanpur, Kanpur 208016, Uttar Pradesh, India,  
E-mail: rgautam@iitk.ac.in

\*All correspondence should be addressed to rgautam@iitk.ac.in

## Table of Content

|                                                                                                                                                            |                     |
|------------------------------------------------------------------------------------------------------------------------------------------------------------|---------------------|
| Physical Methods and Materials                                                                                                                             |                     |
| Synthesis and characterization of ligand scaffold                                                                                                          | S1-S8               |
| Synthesis and characterization of metal complexes                                                                                                          |                     |
| ESI-MS Spectra and HPLC trace for HL1-HL8 and Cu(L1) <sub>2</sub> – Cu(L8) <sub>2</sub>                                                                    | S9-S16              |
| UV-visible absorption spectra of ligands <b>HL1-HL8</b> , complexes <b>Cu(L1)<sub>2</sub>-Cu(L8)<sub>2</sub></b> recorded at room temperature in methanol. | S17                 |
| UV-visible absorption spectra for titration of Cu(OAc) <sub>2</sub> •H <sub>2</sub> O with the ligands <b>HL1- HL8</b> .                                   | S18                 |
| FT-IR spectra of the ligands <b>HL1-HL8</b> and complexes <b>Cu(L1)<sub>2</sub>-Cu(L8)<sub>2</sub></b>                                                     | S19                 |
| X-band EPR spectra of the complexes <b>Cu(L1)<sub>2</sub>-Cu(L8)<sub>2</sub></b>                                                                           | S20                 |
| Single Crystal-XRD Thermal ellipsoid plot of HL2, HL3-HL5, HL8 and Cu(L3) <sub>2</sub>                                                                     | S21                 |
| Stability plot by UV-Visible absorption spectra of complexes <b>Cu(L1)<sub>2</sub>-Cu(L8)<sub>2</sub></b> in PBS buffer                                    | Table S1- S4<br>S22 |
| Electrochemical characterization of Cu(L2) <sub>2</sub>                                                                                                    | S23                 |
| Cytotoxicity profile of Cu(L1) <sub>2</sub> – Cu(L8) <sub>2</sub> in MCF-7 cell lines by Resazurin Assay                                                   | S24-S29             |
| Benzoate Hydroxylation                                                                                                                                     | S30                 |
| <sup>1</sup> H NMR spectra of Cu(L2) <sub>2</sub> in presence of GSH                                                                                       | S31                 |
| ICP-MS Cellular Uptake and Lipophilicity                                                                                                                   | Table S5            |
| DNA Binding                                                                                                                                                | S32                 |
| Hemolytic Assay                                                                                                                                            | S33                 |
| Combination Analysis                                                                                                                                       | S34                 |
| Cell Cycle Arrest                                                                                                                                          | S35                 |
| Antimicrobial Profile                                                                                                                                      | Table S6            |
| Morphological Changes in <i>S. aureus</i> ATCC 29213 Observed by Atomic Force Microscope                                                                   | S36-S37             |
| Morphological Changes in <i>S. aureus</i> ATCC 29213 Observed by Scanning Electron Microscope                                                              | S38-S39             |
| SMILES strings for the ligands (HL1 – HL8) and complexes Cu(L1) <sub>2</sub> – Cu(L8) <sub>2</sub>                                                         | Table S7            |
| Cytotoxicity Table (50% Inhibitory concentrations (IC <sub>50</sub> , μM) of HL1–HL8 and (Cu(L1) <sub>2</sub> –Cu(L8) <sub>2</sub> in resazurin assay.     | Table S8            |

## EXPERIMENTAL SECTION

### Physical methods and materials:

All the reagents and solvents were procured from commercial sources (such as TCI Chemicals, Alfa Aesar and Sigma-Aldrich) and used without purification unless otherwise mentioned. 3-Formyl-4-hydroxybenzoic acid, 5-Fluoro salicylaldehyde and 5-Nitro Salicylaldehyde were synthesized using reported literature.<sup>1-3</sup> Distillation setup was used for dry EtOH and toluene. CDCl<sub>3</sub> and DMSO-d<sub>6</sub> were used as solvents for <sup>1</sup>H and <sup>13</sup>C NMR measurements on JEOL 400 and 500 MHz spectrometers. The residual hydrogen signal of the deuterated solutions was used to reference the <sup>1</sup>H NMR chemical shifts. For <sup>1</sup>H and <sup>13</sup>C NMR spectroscopy, the chemical shift is reported as dimensionless values and is frequency referenced relative to TMS. Waters Micro mass Quattro Micro triple-quadruplet mass spectrometer was used to collect ESI-MS data. UV-visible spectra were obtained using a JASCO V-670 UV-Visible absorption spectrophotometer. FT-IR spectra were recorded on Perkin Elmer Spectrometer in the range of 400-4000 cm<sup>-1</sup> using KBr pellets. Cyclic Voltammetry (CV) analysis was performed on CHI610E electrochemical analyser under oxygen-free conditions. The CV studies were performed on the Cu(L2)<sub>2</sub> complex (10<sup>-3</sup> M) using 0.1 M [nBu<sub>4</sub>N] [ClO<sub>4</sub>] as a supporting electrolyte in DMF solvent at scan rate of 50 mV s<sup>-1</sup>. The three-component electrode consisted of a glassy carbon working electrode, Ag/AgCl reference electrode, and Pt wire as the counter electrode.

All compounds reported in the article are >95% pure by reverse-phase high-performance liquid chromatography (HPLC) analysis. The compounds have also been characterized by other characterization techniques like <sup>1</sup>H and <sup>13</sup>C NMR, IR, EPR, and single crystal XRD.

### Crystal Structure Determinations

Single-crystal X-ray data were collected on a Bruker SMART APEX CCD diffractometer using graphite-monochromated Mo K $\alpha$  radiation ( $\lambda = 0.71069 \text{ \AA}$ ) with the SMART suite of programs.<sup>1</sup> All data were processed and corrected for Lorentz and polarization effects with SAINT and for absorption effects with SADABS.2 Structural solution and refinement were carried out with the SHELXTL suite of

programs.<sup>3</sup> The structures were refined (weighted least squares refinement on  $F^2$ ) to convergence. All the non-hydrogen atoms in all the compounds were refined anisotropically by full-matrix least-squares refinement. The lattice parameters and structural data are listed at the end of this Supporting Information. All the crystallographic data have been deposited in The Cambridge Crystallographic Data Centre; CCDC-2252221 (HL2), 2251966 (HL3), 2251967 (HL5), 2251968 (HL4), 2251965 (HL8) and 2251969 (Cu(L3)<sub>2</sub>) contain the crystallographic data.

1. SMART version 5.628, Bruker AXS Inc., Madison, WI, USA, 2001.
2. G. M. Sheldrick, SADABS, University of Gottingen, Gottingen, Germany, 1996.
3. SHELXTL version 5.1, Bruker AXS Inc., Madison, WI, USA, 1997.

## EXPERIMENTAL SECTION

### Synthesis of 2-Amino-N-(1-phenylethyl) benzamide (1).

Isatoic anhydride (978.78 mg, 6 mmol) and (R)-1-Phenylethylamine (780  $\mu$ L, 6 mmol) were dissolved in dry toluene (40 mL), in a clean and dry round bottom flask. The reaction mixture was stirred and refluxed at 100 °C for 6 h. Afterwards, the solvent was evaporated under low pressure using a rotary evaporator to obtain the desired white-brown product (Yield: 89 %). <sup>1</sup>H NMR (500 MHz, CDCl<sub>3</sub>,  $\delta$  ppm): 7.40 – 7.31 (m, 4H), 7.28 (ddd,  $J$  = 6.6, 3.9, 1.5 Hz, 1H), 7.25 – 7.15 (m, 2H), 6.69 – 6.61 (m, 2H), 6.28 (d,  $J$  = 6.4 Hz, 1H), 5.31 – 5.24 (m, 1H), 1.59 (d,  $J$  = 6.9 Hz, 3H). <sup>13</sup>C NMR (126 MHz, CDCl<sub>3</sub>,  $\delta$  ppm): 168.58 (s), 148.97 (s), 143.49 (s), 132.46 (s), 128.88 (2C), 127.36 (3C), 126.26 (2C), 117.46 (s), 116.67 (s), 49.03 (s), 22.11 (s).

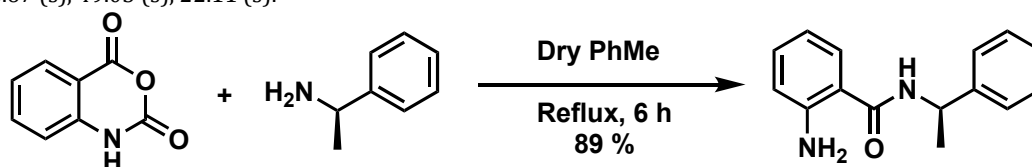

### General Procedure A: Synthesis of HL1-HL8 ligands.

In an oven-dried Schlenk tube, 2-Amino-N-(1-phenylethyl) benzamide (1) and aldehyde (1:1 ratio) were taken and dissolved in ethanol. Acetic acid was added in catalytic amount (3-4 drops) and the reaction was refluxed for 4-6 h. After completion of the reaction, the reaction mixture was cooled to room temperature and solvent was removed in rotavapor. The crude solid product, then, washed with diethyl ether to obtain pure 'ONO' ligands.

**(*R,E*)-2-((2-hydroxybenzylidene)amino)-*N*-(1-phenylethyl)benzamide (HL1).**

Compound **HL1** has been synthesized by general procedure **A** using Salicylaldehyde (1 mmol, 104  $\mu$ l, 122.12 mg) and **1** (1 mmol, 242.6 mg). Yield: 53%.  $^1\text{H}$  NMR (500 MHz,  $\text{CDCl}_3$ ,  $\delta$  ppm): 8.53 (s, 1H), 7.94 (dd,  $J = 7.8, 1.4$  Hz, 1H), 7.51 – 7.42 (m, 2H), 7.39 (dd,  $J = 7.7, 1.6$  Hz, 1H), 7.34 (td,  $J = 7.6, 1.0$  Hz, 1H), 7.29 (dd,  $J = 7.8, 1.4$  Hz, 2H), 7.22 – 7.15 (m, 3H), 7.05 (d,  $J = 8.0$  Hz, 2H), 6.98 (td,  $J = 7.6, 0.9$  Hz, 1H), 6.81 (d,  $J = 6.7$  Hz, 1H), 5.27 (p,  $J = 7.0$  Hz, 1H), 1.54 (d,  $J = 6.9$  Hz, 3H).  $^{13}\text{C}$  NMR (125 MHz,  $\text{CDCl}_3$ ,  $\delta$  ppm): 165.67 (2C), 160.77, 147.42, 143.16, 134.20, 132.94, 131.93, 130.30, 128.68 (3C), 127.35, 126.88, 126.28 (2C), 120.11, 119.64, 119.03, 117.57, 49.99, 21.93. ESI-MS- ( $m/z$ ):  $[\text{M}-\text{H}]^-$  calcd for  $[\text{C}_{22}\text{H}_{19}\text{N}_2\text{O}_2]$ , 343.1447 found, 343.1446. FTIR (KBr),  $\text{cm}^{-1}$ : 3309  $\nu$  (-NH-)amide, 3065-2966  $\nu$  (=CH)ar, 1640  $\nu$  (-C=O-)amide, 1619  $\nu$  (-C=N), 1529  $\nu$  (C=C)ring, 758- 702  $\nu$  (-CH).

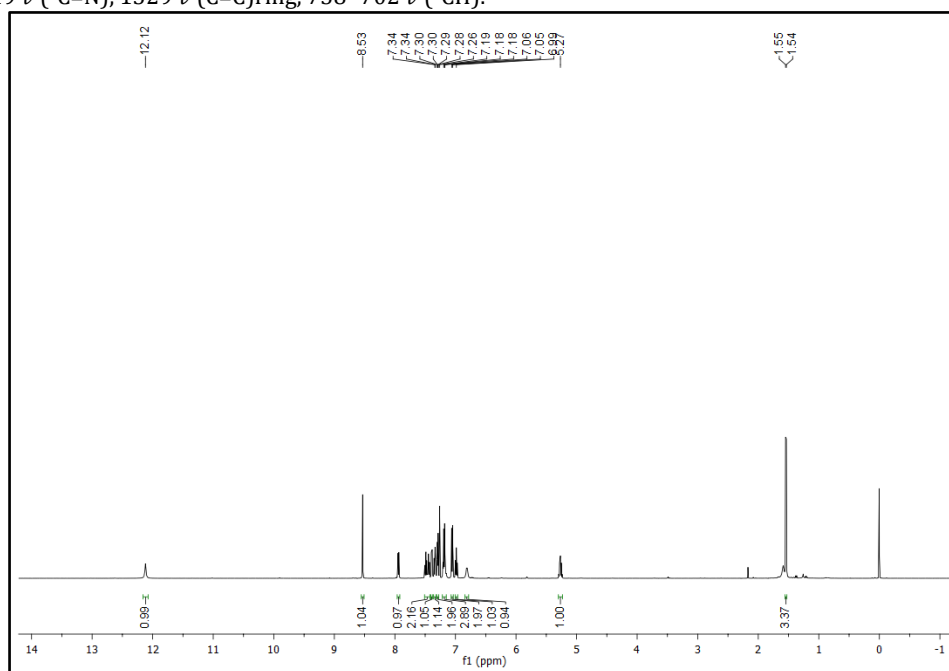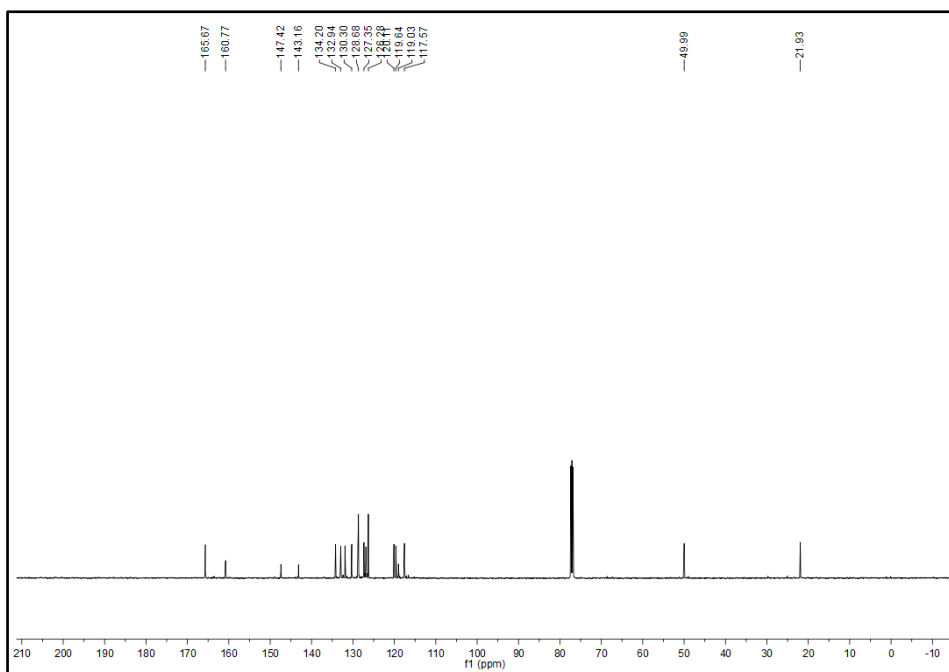

**Fig S1.**  $^1\text{H}$  and  $^{13}\text{C}$   $\{^1\text{H}\}$  NMR spectra for compound **HL1**.

**(*R,E*)-2-((3,5-di-*tert*-butyl-2-hydroxybenzylidene)amino)-*N*-(1-phenylethyl)benzamide (HL2).**

Compound **HL2** has been synthesized by general procedure **A** using 3,5-di-*tert*-butyl-2-hydroxybenzaldehyde (1 mmol, 233.8 mg) and **1** (1 mmol, 240.3 mg). The compound was recrystallized in diethyl ether to get pure product. Yield: 47%. <sup>1</sup>H NMR (500 MHz, CDCl<sub>3</sub>, δ ppm): 8.56 (d, *J* = 4.4 Hz, 1H), 8.02 (dd, *J* = 7.8, 1.3 Hz, 1H), 7.55 (d, *J* = 2.4 Hz, 1H), 7.49 (td, *J* = 7.7, 1.5 Hz, 1H), 7.40 – 7.29 (m, 4H), 7.24 (d, *J* = 2.4 Hz, 1H), 7.17 (tt, *J* = 4.3, 2.0 Hz, 3H), 7.11 (d, *J* = 7.3 Hz, 1H), 7.04 (dd, *J* = 7.9, 1.0 Hz, 1H), 5.28 (p, *J* = 7.0 Hz, 1H), 1.56 (d, *J* = 6.9 Hz, 3H), 1.49 (s, 9H), 1.36 (s, 9H). <sup>13</sup>C NMR (126 MHz, CDCl<sub>3</sub>, δ ppm): 167.25, 165.66, 157.86, 147.71, 143.58, 141.54, 137.48, 132.11, 130.79, 129.41 (2C), 128.59, 127.69, 127.28, 126.78, 126.34 (2C), 120.36, 118.37, 50.10, 35.31, 34.41, 31.59 (3C), 29.61 (3C), 22.24. ESI-MS- (*m/z*): [M-H]<sup>-</sup> calcd for [C<sub>30</sub>H<sub>36</sub>N<sub>2</sub>O<sub>2</sub>], 455.2699 found, 455.2680. FTIR (KBr), cm<sup>-1</sup>: 3286 *ν* (-NH-)amide, 3063-2900 *ν* (=CH)ar 1627 *ν* (-C=O-)amide, 1588 *ν* (-C=N), 1434 *ν*(C=C)ring, 765- 702 *ν* (-CH).

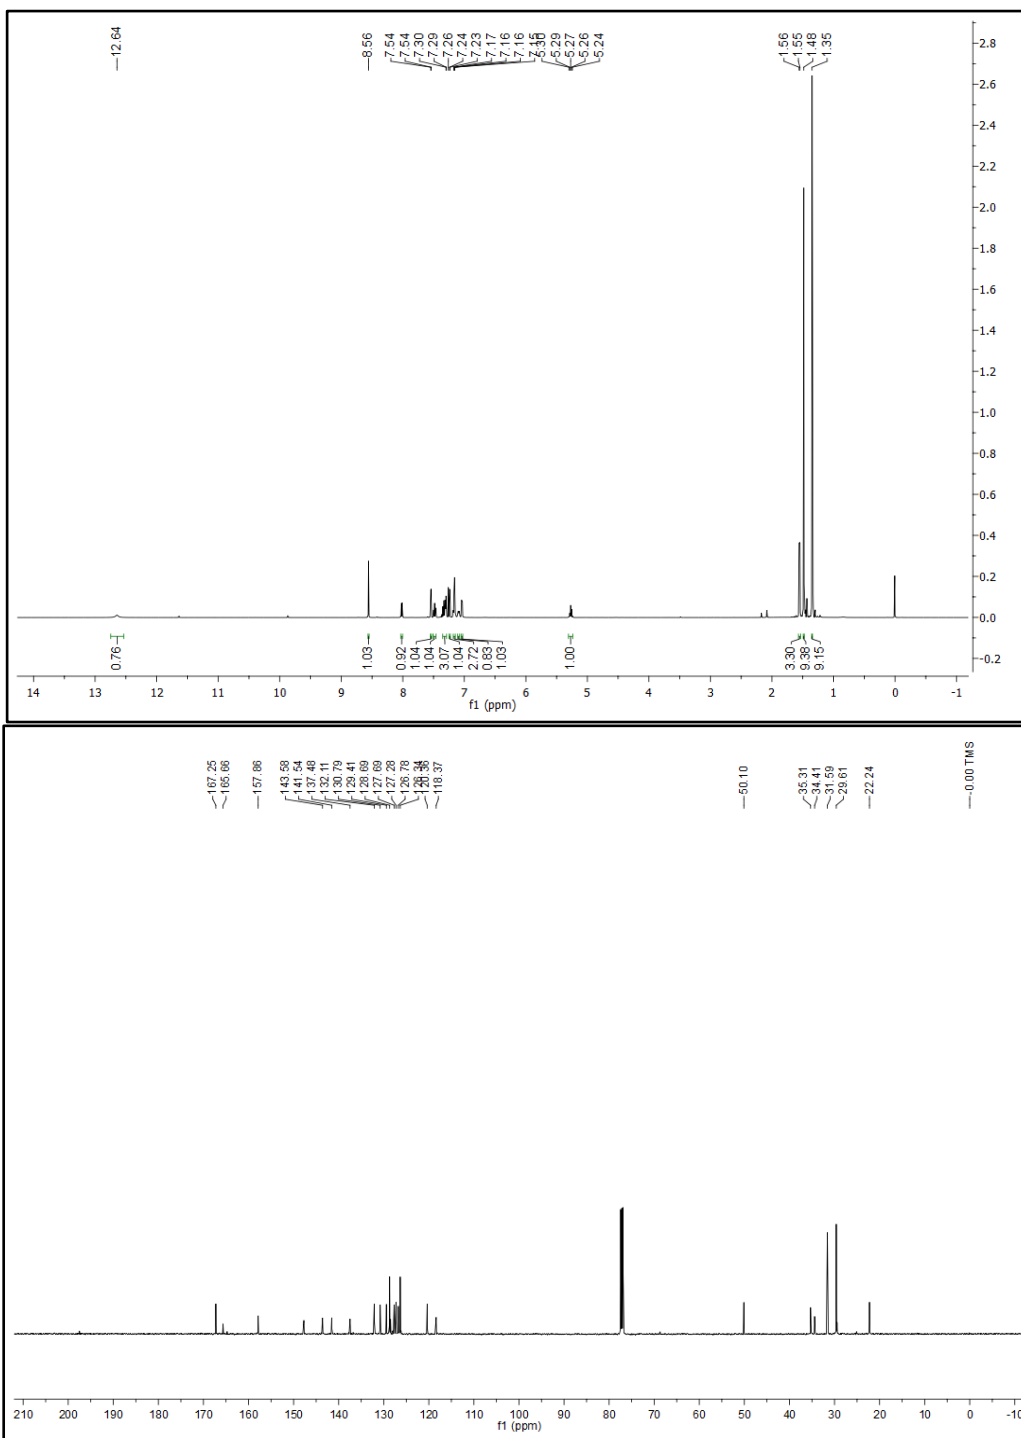

Fig S2.  $^1\text{H}$  and  $^{13}\text{C}$   $\{^1\text{H}\}$  NMR spectra for compound **HL2**.

**(*R,E*)-2-((5-chloro-2-hydroxybenzylidene)amino)-*N*-(1-phenylethyl)benzamide (**HL3**).**

Compound **HL3** has been synthesized by general procedure **A** using 5-chloro-2-hydroxybenzaldehyde (1 mmol, 156.7 mg) and **1** (1 mmol, 241.2 mg). Yield: 66%.  $^1\text{H}$  NMR (500 MHz,  $\text{CDCl}_3$ ,  $\delta$  ppm): 8.45 (s), 7.83 (dd,  $J = 7.7, 1.4$  Hz, 1H), 7.48 (td,  $J = 7.7, 1.5$  Hz, 1H), 7.37 – 7.28 (m, 5H), 7.25 – 7.17 (m, 3H), 7.07 (dd,  $J = 7.9, 0.7$  Hz, 1H), 6.98 (d,  $J = 8.8$  Hz, 1H), 6.59 (d,  $J = 7.2$  Hz, 1H), 5.27 (p,  $J = 7.0$  Hz, 1H), 1.54 (d,  $J = 6.9$  Hz, 3H).  $^{13}\text{C}$  NMR (126 MHz,  $\text{CDCl}_3$ ,  $\delta$  ppm): 165.97, 163.97, 159.43, 146.72, 143.03, 133.85, 131.80 (2C), 129.95, 128.77 (2C), 127.40 (2C), 126.33 (2C), 124.19, 119.88, 119.20, 49.92, 21.83. ESI-MS $^+$  ( $m/z$ ):  $[\text{M}-\text{H}]^-$  calcd for  $[\text{C}_{22}\text{H}_{18}\text{N}_2\text{O}_2\text{Cl}]$ , 377.1057; found, 377.1063. FTIR (KBr),  $\text{cm}^{-1}$ : 3320  $\nu$  (-NH-)amide, 3056-2976  $\nu$  (=CH)ar, 1642  $\nu$  (-C=O-)amide, 1610  $\nu$  (-C=N), 1353  $\nu$  (C=C)ring, 704-703  $\nu$  (-CH).

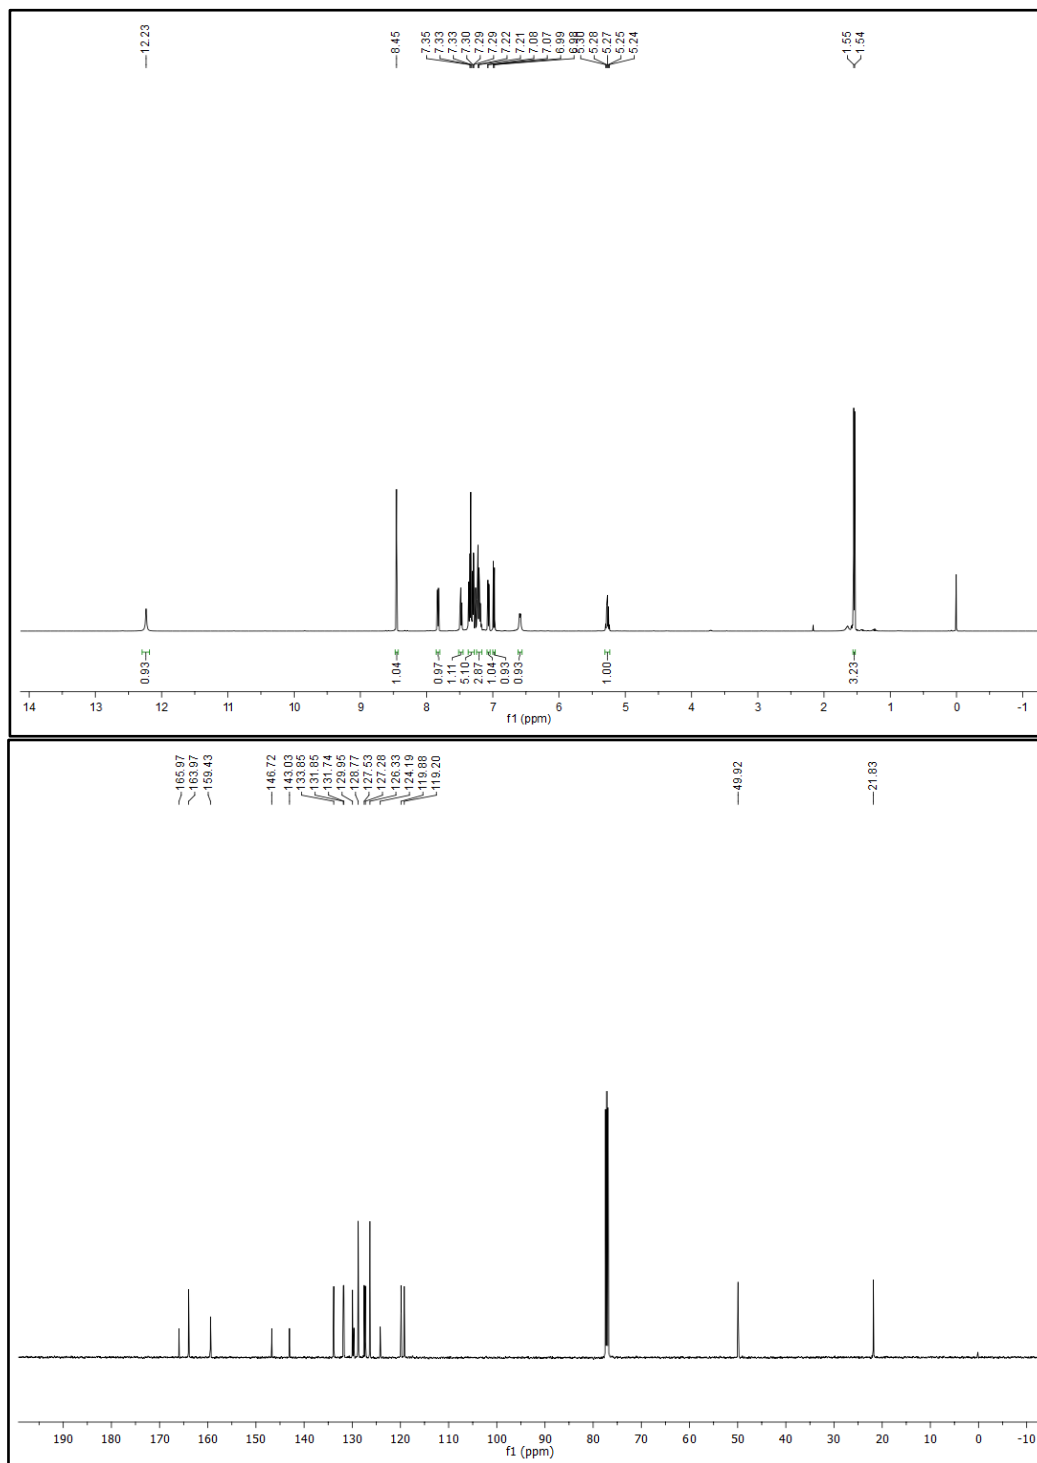

**Fig S3.**  $^1\text{H}$  and  $^{13}\text{C}$   $\{^1\text{H}\}$  NMR spectra for compound **HL3**.

**(*R,E*)-2-((5-bromo-2-hydroxybenzylidene)amino)-*N*-(1-phenylethyl)benzamide (HL4).**

Compound **HL4** has been synthesized by general procedure **A** using 5-bromo-2-hydroxybenzaldehyde (1 mmol, 200.8 mg) and **1** (1 mmol, 240.3 mg). Yield: 58%.  $^1\text{H}$  NMR (500 MHz,  $\text{CDCl}_3$ ,  $\delta$  ppm): 8.48 (s, 1H), 7.86 (dd,  $J = 7.7, 1.0$  Hz, 1H), 7.56 – 7.49 (m, 3H), 7.40 – 7.30 (m, 3H), 7.30 – 7.21 (m, 3H), 7.10 (d,  $J = 7.8$  Hz, 1H), 6.97 (d,  $J = 8.6$  Hz, 1H), 6.59 (d,  $J = 6.9$  Hz, 1H), 5.30 (p,  $J = 7.0$  Hz, 1H), 1.58 (d,  $J = 6.9$  Hz, 3H).  $^{13}\text{C}$  NMR (126 MHz,  $\text{CDCl}_3$ ,  $\delta$  ppm): 166.08, 163.99, 160.02, 146.79, 143.14, 136.75, 134.89, 131.97, 129.93, 128.90, 127.54, 126.45, 120.58, 119.87, 111.14, 50.04, 21.95. ESI-MS $^+$  ( $m/z$ ):  $[\text{M}-\text{H}]^-$  calcd for  $[\text{C}_{22}\text{H}_{18}\text{N}_2\text{O}_2\text{Br}]$ , 421.0552; found, 421.0555. FTIR (KBr),  $\text{cm}^{-1}$ : 3313  $\nu$  (-NH-)amide, 3061-2976  $\nu$  (=CH)ar, 1640  $\nu$  (-C=O-)amide, 1524  $\nu$  (-C=N), 1345  $\nu$  (C=C)ring, 758- 702  $\nu$  (-CH).

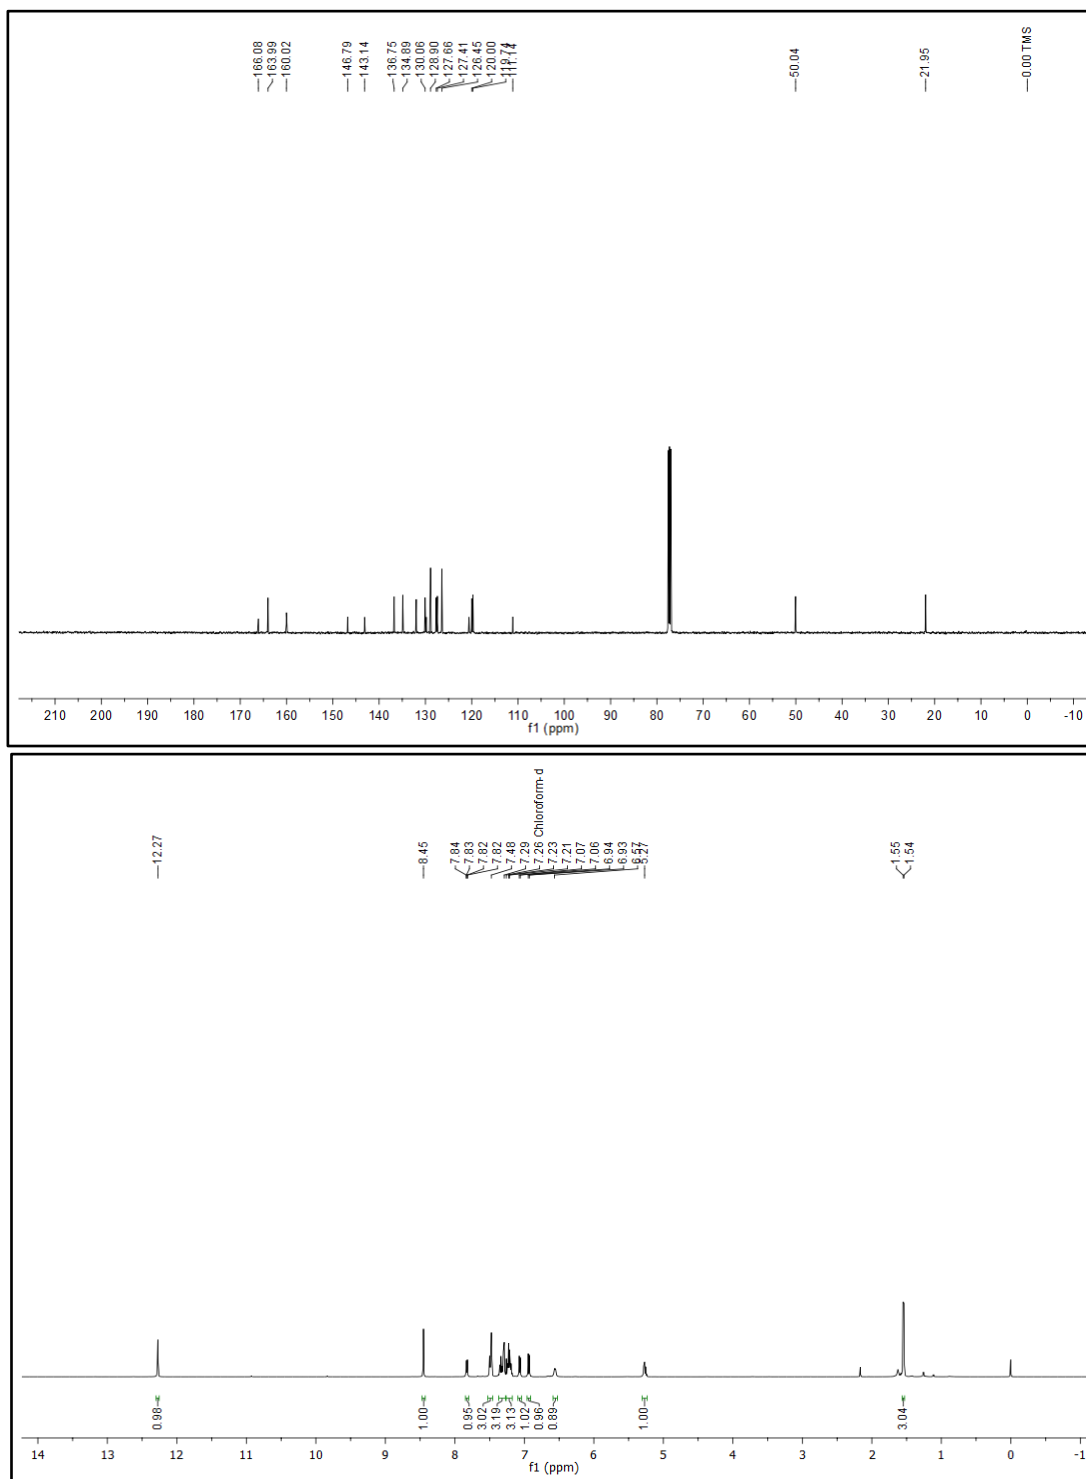

**Fig S4.**  $^1\text{H}$  and  $^{13}\text{C}$   $\{^1\text{H}\}$  NMR spectra for compound **HL4**.

**(*R,E*)-2-((5-fluoro-2-hydroxybenzylidene)amino)-*N*-(1-phenylethyl)benzamide (HL5).**

Compound **HL5** has been synthesized by general procedure **A** using 5-fluoro-2-hydroxybenzaldehyde (1 mmol, 167.1 mg) and **1** (1.5 mmol, 356.3 mg). (Yield: 71%).  $^1\text{H NMR}$  (500 MHz,  $\text{DMSO-}d_6$ ,  $\delta$  ppm):  $\delta$  11.99 (s, 1H), 8.46 (s, 1H), 7.86 (dd,  $J = 7.8, 1.4$  Hz, 1H), 7.48 (td,  $J = 7.6, 1.4$  Hz, 1H), 7.34 (dt,  $J = 8.1, 4.1$  Hz, 1H), 7.29 (d,  $J = 6.7$  Hz, 2H), 7.23 – 7.13 (m, 4H), 7.06 (dd,  $J = 8.2, 3.0$  Hz, 2H), 6.99 (dd,  $J = 9.1, 4.4$  Hz, 1H), 6.59 (d,  $J = 7.1$  Hz, 1H), 5.26 (p,  $J = 6.9$  Hz, 1H), 1.54 (d,  $J = 6.9$  Hz, 3H).  $^{13}\text{C NMR}$  (126 MHz,  $\text{DMSO-}d_6$ ,  $\delta$  ppm):  $\delta$  165.90, 164.12, 156.99, 156.69, 146.84, 143.04, 131.85, 130.00, 129.41, 128.72, 127.45, 127.18, 126.30, 121.35, 121.16, 119.87, 118.77, 117.54, 49.90, 21.83. ESI- $\text{MS}^+$  ( $m/z$ ): [ $\text{M-H}$ ] $^-$  calcd for  $[\text{C}_{22}\text{H}_{18}\text{N}_2\text{O}_2\text{F}]$ , 361.1352; found, 361.1381. FTIR (KBr),  $\text{cm}^{-1}$ : 3290  $\nu$  (-NH-)amide, 3000-2900  $\nu$  (=CH)ar, 1636  $\nu$  (-C=O-)amide, 1617  $\nu$  (-C=N), 1472  $\nu$  (C=C)ring, 756-699  $\nu$  (-CH).

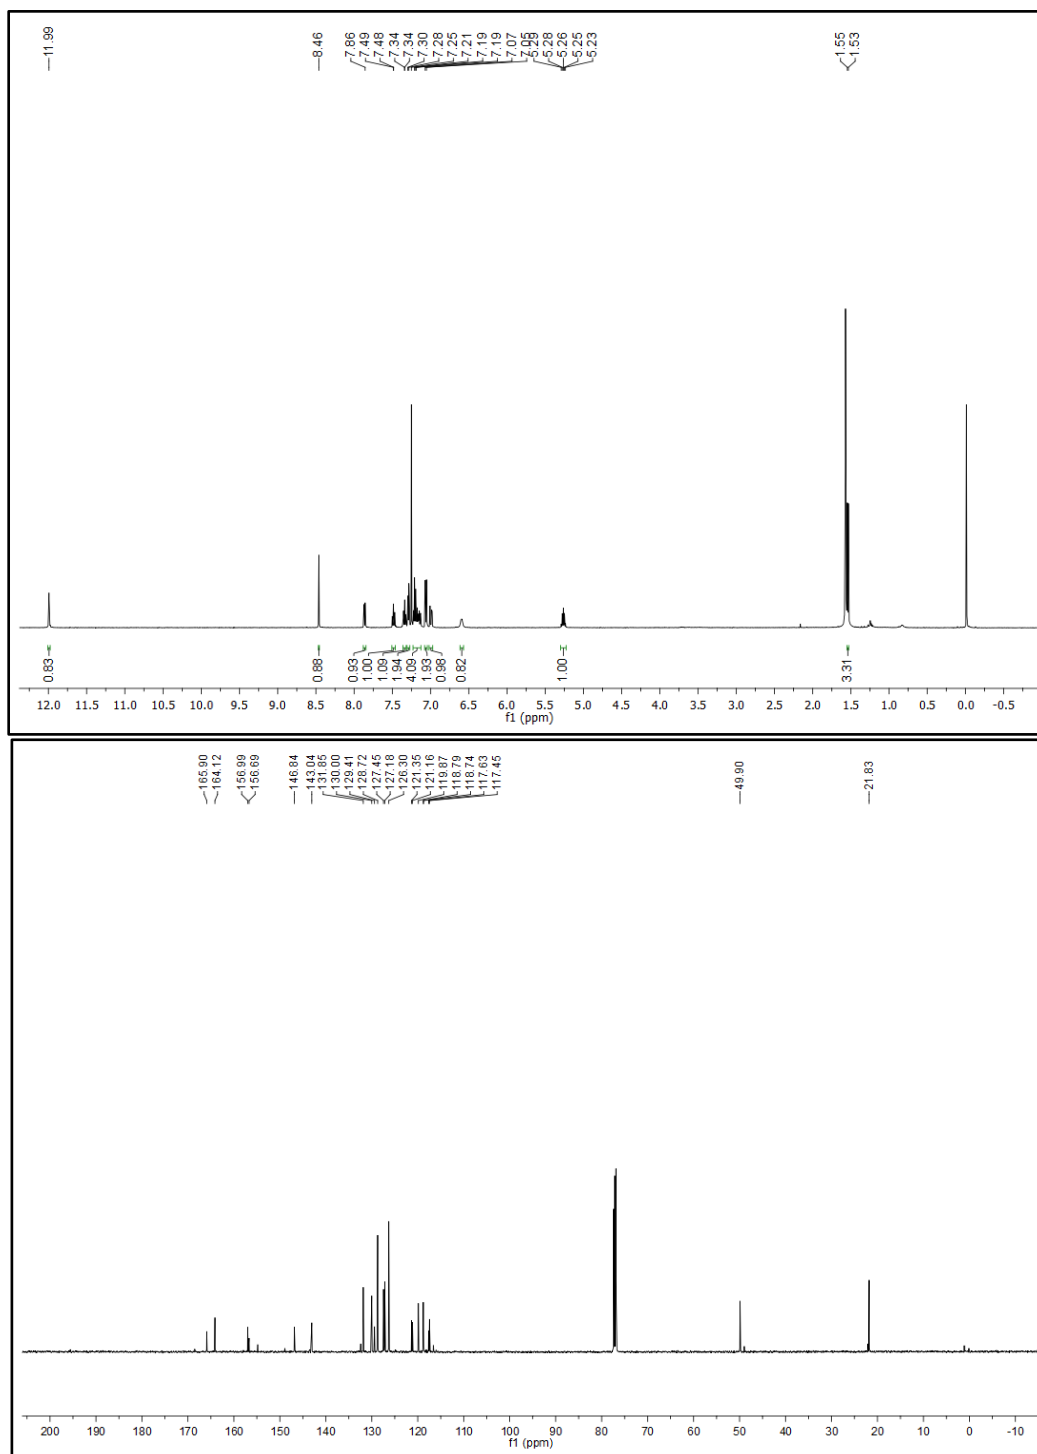



Fig S5.  $^1\text{H}$  and  $^{13}\text{C}$   $\{^1\text{H}\}$  NMR spectra for compound HL5.

**(*R,E*)-2-((2-hydroxy-5-nitrobenzylidene)amino)-*N*-(1-phenylethyl)benzamide (HL6).**

Compound HL6 has been synthesized by general procedure A using 5-nitro-2-hydroxybenzaldehyde (1 mmol, 167.1 mg) and **1** (1.5 mmol, 356.3 mg). Yield: 53%.  $^1\text{H}$  NMR (500 MHz, DMSO-*d*<sub>6</sub>,  $\delta$  ppm): (s, 1H), 8.35 (d,  $J$  = 2.7 Hz, 1H), 8.29 (dd,  $J$  = 9.2, 2.7 Hz, 1H), 7.70 (dd,  $J$  = 7.7, 1.4 Hz, 1H), 7.55 – 7.51 (m, 1H), 7.39 (d,  $J$  = 7.7 Hz, 1H), 7.34 (s, 2H), 7.29 (s, 1H), 7.25 – 7.19 (m, 2H), 7.11 (d,  $J$  = 9.2 Hz, 1H), 6.22 (s, 1H), 5.35 – 5.28 (m, 1H), 1.11 (s, 3H).  $^{13}\text{C}$  NMR (126 MHz, DMSO-*d*<sub>6</sub>,  $\delta$  ppm): 168.71, 167.73, 166.51, 165.50, 161.98, 145.98, 138.93, 132.27, 131.76, 129.40, 128.45, 127.29, 126.61, 120.01, 116.68, 115.11, 48.81, 46.86, 22.96. ESI-MS- ( $m/z$ ): [M-H]<sup>-</sup> calcd for [C<sub>22</sub>H<sub>18</sub>N<sub>3</sub>O<sub>4</sub>], 388.1297; found, 388.1299. FTIR (KBr), cm<sup>-1</sup>: 3286  $\nu$  (-NH-)amide, 3000-2900  $\nu$  (=CH)ar, 1621  $\nu$  (-C=O-)amide, 1532  $\nu$  (-C=N), 1334  $\nu$  (C=C)ring, 753- 698  $\nu$  (-CH).

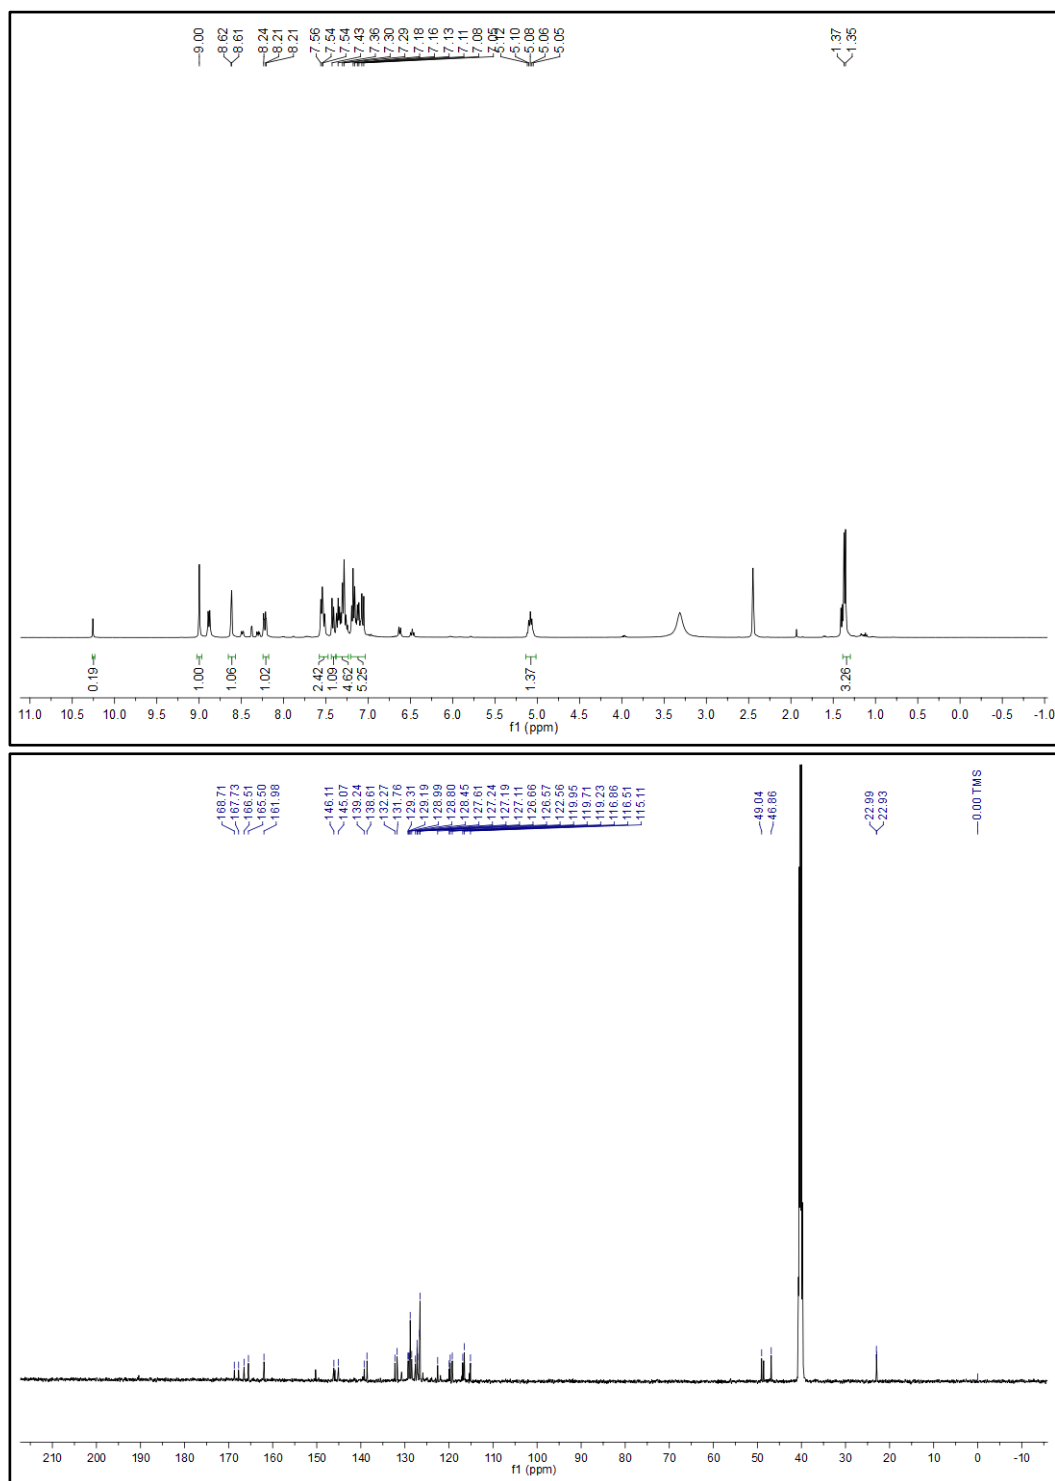

**Fig S6.**  $^1\text{H}$  and  $^{13}\text{C}$   $\{^1\text{H}\}$  NMR spectra for compound **HL6**.

**(*R,E*)-4-hydroxy-3-(((2-((1-phenylethyl)carbamoyl)phenyl)imino)methyl)benzoic acid (HL7).**

Compound **HL7** has been synthesized by general procedure **A** using 3-formyl-4-hydroxybenzoic acid (2 mmol, 332.2 mg) and **1** (2 mmol, 481.9 mg). Yield: 60%.  $^1\text{H}$  NMR (500 MHz,  $\text{DMSO-}d_6$ ,  $\delta$  ppm): 13.07 (s, 1H), 12.75 (s, 1H), 8.99 – 8.90 (m, 2H), 8.36 (d,  $J = 2.1$  Hz, 1H), 7.98 (dd,  $J = 8.5, 2.1$  Hz, 1H), 7.56 (t,  $J = 7.3$  Hz, 2H), 7.44 (d,  $J = 7.9$  Hz, 1H), 7.35 (dt,  $J = 20.5, 7.8$  Hz, 3H), 7.20 (dt,  $J = 30.1, 7.2$  Hz, 3H), 7.04 (d,  $J = 8.6$  Hz, 1H), 5.11 (p,  $J = 7.0$  Hz, 1H), 1.40 (d,  $J = 7.0$  Hz, 3H). ESI-MS- ( $m/z$ ):  $[\text{M-H}]^-$  calcd for  $[\text{C}_{23}\text{H}_{19}\text{N}_2\text{O}_4]$ , 387.1345; found, 387.1342. FTIR (KBr),  $\text{cm}^{-1}$ : 3273  $\nu$  ( $-\text{NH}-$ )amide, 3000-2900  $\nu$  ( $=\text{CH}$ )ar, 1686  $\nu$  ( $-\text{C}=\text{O}$ )amide, 1611  $\nu$  ( $-\text{C}=\text{N}$ ), 1444  $\nu$  ( $\text{C}=\text{C}$ )ring, 756-695  $\nu$  ( $-\text{CH}$ ).

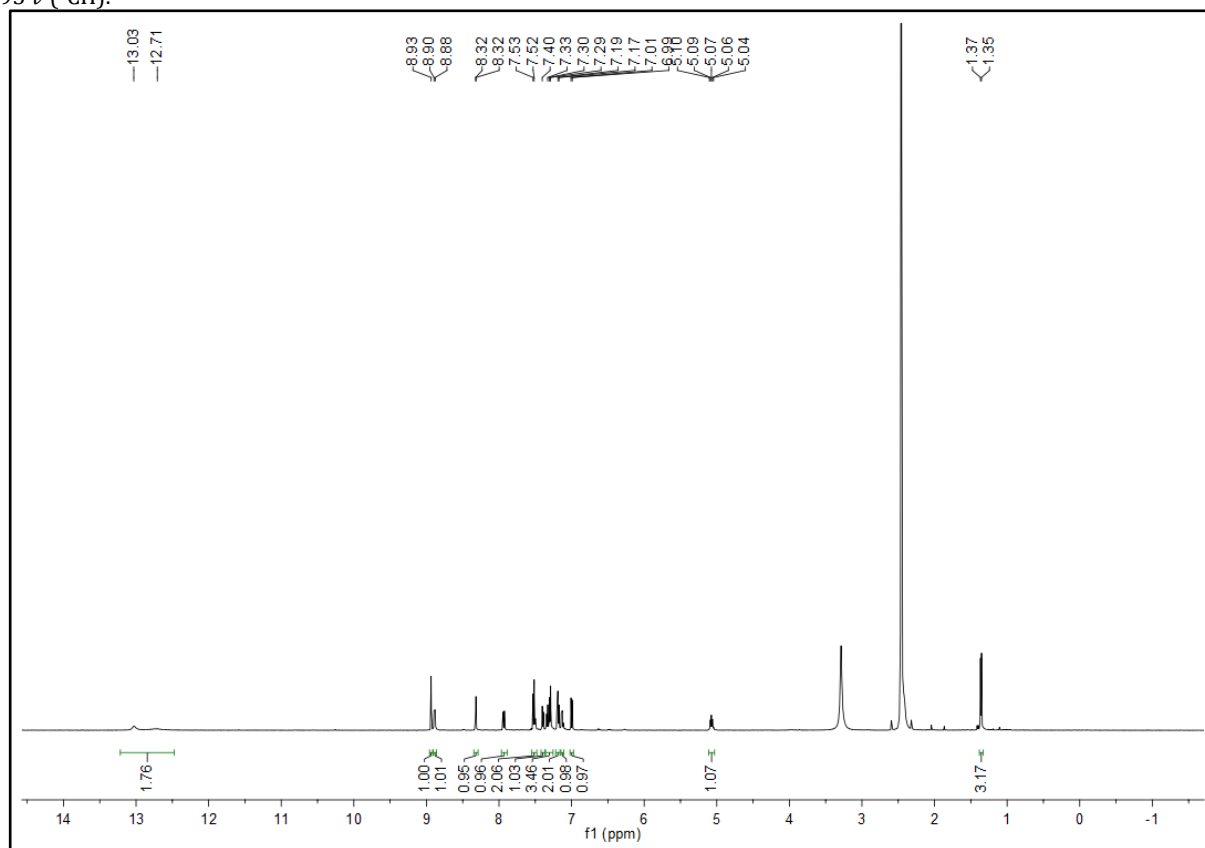

**Fig S7.**  $^1\text{H}$  and  $^{13}\text{C}$   $\{^1\text{H}\}$  NMR spectra for compound **HL7**.

**(*R,E*)-2-((4-(diethylamino)-2-hydroxybenzylidene)amino)-*N*-(1-phenylethyl)benzamide (HL8).**

Compound **HL8** has been synthesized by general procedure **A** using 4-(diethylamino)-2-hydroxybenzaldehyde (1 mmol, 194.3 mg) and **1** (1 mmol, 240.3 mg). Yield: 53%. <sup>1</sup>H NMR (500 MHz, CDCl<sub>3</sub>, δ ppm): 8.37 (s, 1H), 8.16 (dd, *J* = 7.8, 1.5 Hz, 1H), 7.67 (d, *J* = 7.3 Hz, 1H), 7.52 (td, *J* = 7.7, 1.6 Hz, 1H), 7.40 (dd, *J* = 5.3, 3.4 Hz, 2H), 7.34 (ddd, *J* = 9.2, 5.9, 1.1 Hz, 1H), 7.31 – 7.27 (m, 2H), 7.25 – 7.22 (m, 1H), 7.05 (dd, *J* = 7.9, 0.9 Hz, 1H), 6.37 (dt, *J* = 6.2, 3.1 Hz, 1H), 6.30 (d, *J* = 2.4 Hz, 1H), 5.35 (p, *J* = 7.0 Hz, 1H), 3.51 (p, *J* = 7.1 Hz, 4H), 1.63 (d, *J* = 6.9 Hz, 3H), 1.32 (t, *J* = 7.1 Hz, 6H). <sup>13</sup>C NMR (126 MHz, CDCl<sub>3</sub>, δ ppm): 176.14, 163.44, 134.65, 131.43, 128.52, 127.12, 126.19, 125.56, 120.50, 104.35, 97.60, 49.99, 44.73, 22.29, 12.70. ESI-MS+ (*m/z*): [M+H]<sup>+</sup> calcd for [C<sub>26</sub>H<sub>28</sub>N<sub>3</sub>O<sub>2</sub>], 416.2338; found, 416.2331. FTIR (KBr), cm<sup>-1</sup>: 3273 *ν* (-NH-)amide, 2962 (=CH)ar, 1636 *ν* (-C=O-)amide, 1571 *ν* (-C=N), 1339 *ν* (C=C)ring, 763- 699 *ν* (-CH).

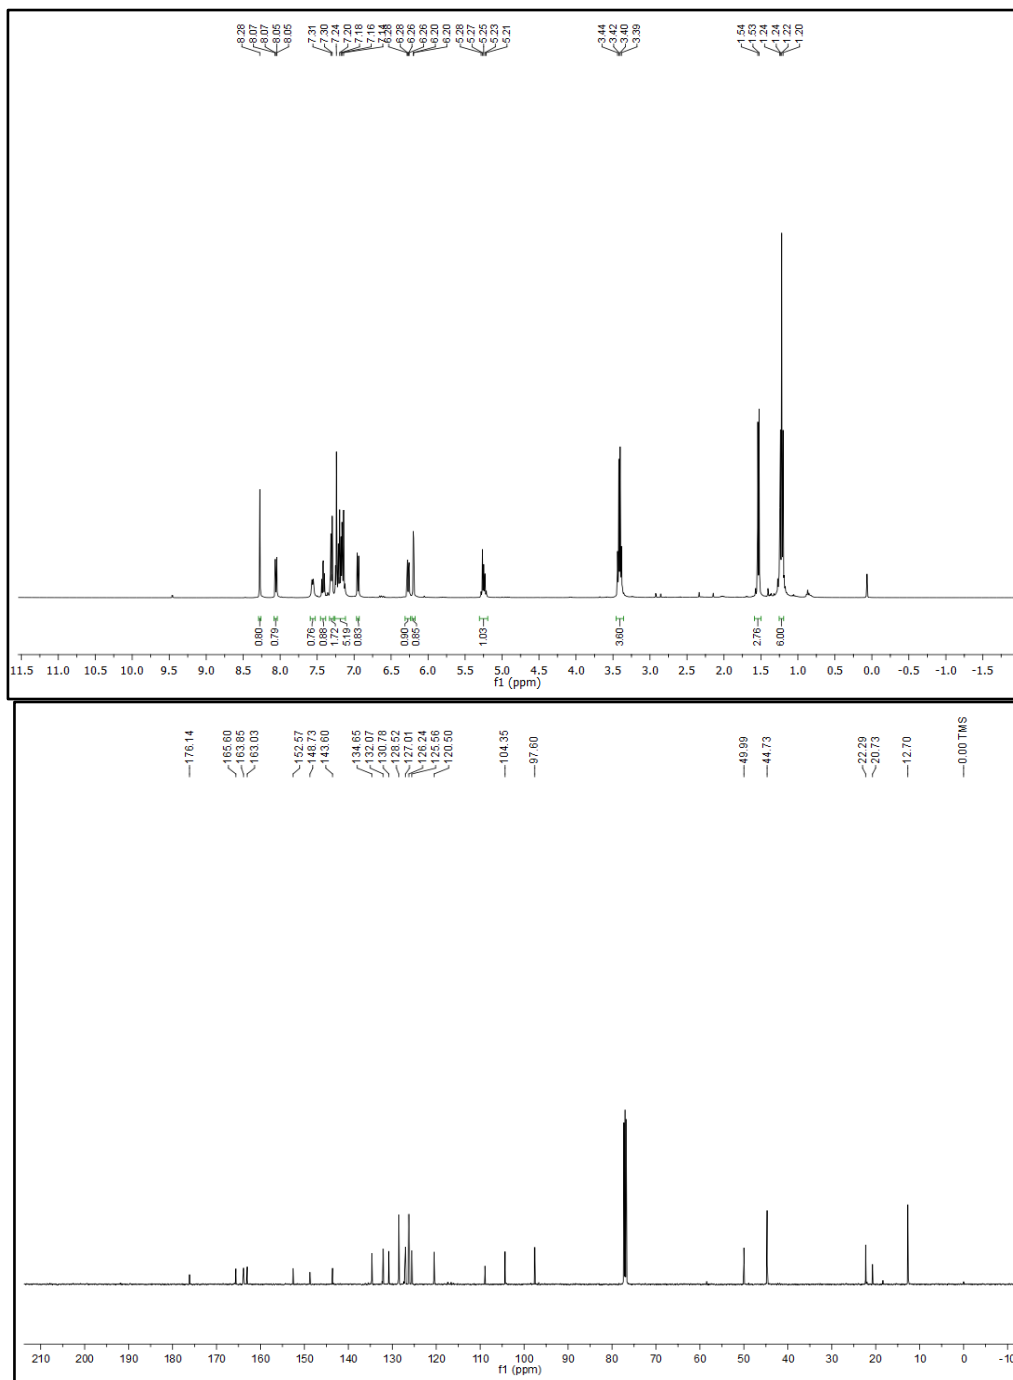

**Fig S8.**  $^1\text{H}$  and  $^{13}\text{C}$   $\{^1\text{H}\}$  NMR spectra for compound **HL8**.

**Synthesis of copper complex.** In a 25 ml round bottom flask, ligand HL1-HL8 (0.2 mmol) was dissolved in THF (10 ml). Afterwards, a solution of  $\text{Cu}(\text{OAc})_2 \cdot \text{H}_2\text{O}$  (0.12 mmol) in THF (5 ml) was added to the ligand solution in dropwise and stirred it for 1 h at room temperature. A sudden colour transition from orange to green/brown was observed. The progress of the reaction was monitored by UV-Visible absorption spectroscopy. The solvent was then removed through rotavapor, and the crude green/brown solid was then dissolved in DCM and filtered via celite plug. The compound then washed with diethyl ether to get the powdered green copper complex.

**Cu(L1)<sub>2</sub>.** Followed same procedure as above with ligand **HL1** (0.2 mmol, 67.3 mg) and  $\text{Cu}(\text{OAc})_2 \cdot \text{H}_2\text{O}$  (0.12 mmol, 24.6 mg). (Yield: 76%) UV-Vis (Methanol)  $\lambda_{\text{max}}$  ( $\epsilon$ ), 283 nm ( $1247 \text{ mol}^{-1} \text{ L cm}^{-1}$ ), 412 nm ( $5808 \text{ mol}^{-1} \text{ L cm}^{-1}$ ), , 708 nm ( $208 \text{ mol}^{-1} \text{ L cm}^{-1}$ ). ESI-MS<sup>+</sup> (m/z):  $[\text{M}+\text{H}]^+$  calcd for  $[\text{C}_{44}\text{H}_{39}\text{CuN}_4\text{O}_4]$ , 750.2267; found, 750.2254. FTIR (KBr),  $\text{cm}^{-1}$ : 3227  $\nu$  (-NH-)amide, 3058-2936  $\nu$  (=CH)ar, 1611  $\nu$  (-C=O-)amide, 1522  $\nu$  (-C=N), 1383  $\nu$  (C=C)ring, 755- 697  $\nu$  (-CH). **Cu(L2)<sub>2</sub>.** Followed same procedure as above with ligand **HL2** (0.2 mmol, 91.1 mg) and  $\text{Cu}(\text{OAc})_2 \cdot \text{H}_2\text{O}$  (0.12 mmol, 24.9 mg). (Yield: 67%) UV-Vis (Methanol)  $\lambda_{\text{max}}$  ( $\epsilon$ ), 302 nm ( $26450 \text{ mol}^{-1} \text{ L cm}^{-1}$ ), 433 nm ( $10916 \text{ mol}^{-1} \text{ L cm}^{-1}$ ), 705 nm ( $192 \text{ mol}^{-1} \text{ L cm}^{-1}$ ). ESI-MS<sup>+</sup> (m/z):  $[\text{M}+\text{H}]^+$  calcd for  $[\text{C}_{60}\text{H}_{71}\text{CuN}_4\text{O}_4]$ , 974.4771; found, 974.4767. FTIR (KBr),  $\text{cm}^{-1}$ : 3065  $\nu$  (-NH-)amide, 2964  $\nu$  (=CH)ar, 1598  $\nu$  (-C=O-)amide, 1533  $\nu$  (-C=N), 1306  $\nu$  (C=C)ring, 748- 706  $\nu$  (-CH).

**Cu(L3)<sub>2</sub>.** Followed same procedure as above with ligand **HL3** (0.2 mmol, 76.1 mg) and  $\text{Cu}(\text{OAc})_2 \cdot \text{H}_2\text{O}$  (0.12 mmol, 24.7 mg). (Yield: 70%) UV-Vis (Methanol)  $\lambda_{\text{max}}$  ( $\epsilon$ ), 315 nm ( $7908 \text{ mol}^{-1} \text{ L cm}^{-1}$ ), 424 nm ( $6216 \text{ mol}^{-1} \text{ L cm}^{-1}$ ), 703 nm ( $132 \text{ mol}^{-1} \text{ L cm}^{-1}$ ). ESI-MS<sup>+</sup> (m/z):  $[\text{M}+\text{H}]^+$  calcd for  $[\text{C}_{44}\text{H}_{37}\text{Cl}_2\text{CuN}_4\text{O}_4]$ , 818.1488; found, 818.1477. FTIR (KBr),  $\text{cm}^{-1}$ : 3313  $\nu$  (-NH-)amide, 3061-2978  $\nu$  (=CH)ar, 1608  $\nu$  (-C=O-)amide, 1526  $\nu$  (-C=N), 1313  $\nu$  (C=C)ring, 766- 705  $\nu$  (-CH).

**Cu(L4)<sub>2</sub>.** Followed same procedure as above with ligand **HL4** (0.2 mmol, 84.7 mg) and  $\text{Cu}(\text{OAc})_2 \cdot \text{H}_2\text{O}$  (0.12 mmol, 25.5 mg). (Yield: 71%) UV-Vis (Methanol)  $\lambda_{\text{max}}$  ( $\epsilon$ ), 243 nm ( $43520 \text{ mol}^{-1} \text{ L cm}^{-1}$ ), 423 nm ( $8481 \text{ mol}^{-1} \text{ L cm}^{-1}$ ), 706 nm ( $276 \text{ mol}^{-1} \text{ L cm}^{-1}$ ). ESI-MS<sup>+</sup> (m/z):  $[\text{M}+\text{H}]^+$  calcd for  $[\text{C}_{44}\text{H}_{37}\text{Br}_2\text{CuN}_4\text{O}_4]$ , 908.0457; found, 908.0424. FTIR (KBr),  $\text{cm}^{-1}$ : 3223  $\nu$  (-NH-)amide, 2972-2915  $\nu$  (=CH)ar, 1619  $\nu$  (-C=O-)amide, 1510  $\nu$  (-C=N), 1376  $\nu$  (C=C)ring, 754- 693  $\nu$  (-CH).

**Cu(L5)<sub>2</sub>.** Followed same procedure as above with ligand **HL5** (0.2 mmol, 71.9 mg) and  $\text{Cu}(\text{OAc})_2 \cdot \text{H}_2\text{O}$  (0.12 mmol, 24.7 mg). (Yield: 78%) UV-Vis (Methanol)  $\lambda_{\text{max}}$  ( $\epsilon$ ), 282 nm ( $19063 \text{ mol}^{-1} \text{ L cm}^{-1}$ ), 427 nm ( $8726 \text{ mol}^{-1} \text{ L cm}^{-1}$ ), 703 nm ( $324 \text{ mol}^{-1} \text{ L cm}^{-1}$ ). ESI-MS<sup>+</sup> (m/z):  $[\text{M}+\text{H}]^+$  calcd for  $[\text{C}_{44}\text{H}_{39}\text{F}_2\text{CuN}_4\text{O}_4]$ , 786.2089; found, 786.2057. FTIR (KBr),  $\text{cm}^{-1}$ : 3231  $\nu$  (-NH-)amide, 3000-2900  $\nu$  (=CH)ar, 1609  $\nu$  (-C=O-)amide, 1524  $\nu$  (-C=N), 1453  $\nu$  (C=C)ring, 756- 699  $\nu$  (-CH).

**Cu(L6)<sub>2</sub>.** Followed same procedure as above with ligand **HL6** (0.2 mmol, 80.6 mg) and  $\text{Cu}(\text{OAc})_2 \cdot \text{H}_2\text{O}$  (0.12 mmol, 24.3 mg). (Yield: 54%) UV-Vis (Methanol)  $\lambda_{\text{max}}$  ( $\epsilon$ ), 370 nm ( $19685 \text{ mol}^{-1} \text{ L cm}^{-1}$ ), 706 nm ( $84 \text{ mol}^{-1} \text{ L cm}^{-1}$ ). ESI-MS<sup>+</sup> (m/z):  $[\text{M}+\text{H}]^+$  calcd for  $[\text{C}_{44}\text{H}_{39}\text{CuN}_4\text{O}_4]$ , 750.2267; found, 750.2254. FTIR (KBr),  $\text{cm}^{-1}$ : 3256  $\nu$  (-NH-)amide, 2917-2841  $\nu$  (=CH)ar, 1608  $\nu$  (-C=O-)amide, 1538  $\nu$  (-C=N), 1467  $\nu$  (C=C)ring, 766- 692  $\nu$  (-CH).

**Cu(L7)<sub>2</sub>.** Followed same procedure as above with ligand **HL7** (0.2 mmol, 77.8 mg) and  $\text{Cu}(\text{OAc})_2 \cdot \text{H}_2\text{O}$  (0.12 mmol, 24 mg). (Yield: 57%) UV-Vis (Methanol)  $\lambda_{\text{max}}$  ( $\epsilon$ ), 257 nm ( $27380 \text{ mol}^{-1} \text{ L cm}^{-1}$ ), 402 nm ( $7395 \text{ mol}^{-1} \text{ L cm}^{-1}$ ), 699 nm ( $96 \text{ mol}^{-1} \text{ L cm}^{-1}$ ). ESI-MS<sup>+</sup> (m/z):  $[\text{M}+\text{H}]^+$  calcd for  $[\text{C}_{44}\text{H}_{39}\text{CuN}_4\text{O}_4]$ , 840.1969; found, 840.1972. FTIR (KBr),  $\text{cm}^{-1}$ : 3256  $\nu$  (-NH-)amide, 2917-2841  $\nu$  (=CH)ar, 1608  $\nu$  (-C=O-)amide, 1538  $\nu$  (-C=N), 1467  $\nu$  (C=C)ring, 766- 692  $\nu$  (-CH).

**Cu(L8)<sub>2</sub>.** Followed same procedure as above with ligand **HL8** (0.2 mmol, 83.18 mg) and  $\text{Cu}(\text{OAc})_2 \cdot \text{H}_2\text{O}$  (0.12 mmol, 24.5 mg). (Yield: 69%) UV-Vis (Methanol)  $\lambda_{\text{max}}$  ( $\epsilon$ ), 235 nm ( $31913 \text{ mol}^{-1} \text{ L cm}^{-1}$ ), 412 nm ( $40172 \text{ mol}^{-1} \text{ L cm}^{-1}$ ), , 699 nm ( $276 \text{ mol}^{-1} \text{ L cm}^{-1}$ ). ESI-MS<sup>+</sup> (m/z):  $[\text{M}+\text{H}]^+$  calcd for  $[\text{C}_{52}\text{H}_{57}\text{CuN}_6\text{O}_4]$ , 892.3737; found, 893.3722. FTIR (KBr),  $\text{cm}^{-1}$ : 3221  $\nu$  (-NH-)amide, 2972  $\nu$  (=CH)ar, 1566  $\nu$  (-C=O-)amide, 1486  $\nu$  (-C=N), 1348  $\nu$  (C=C)ring, 756- 702  $\nu$  (-CH).

Figure S9: Characterization ESI-MS and HPLC of Cu(L1)<sub>2</sub>

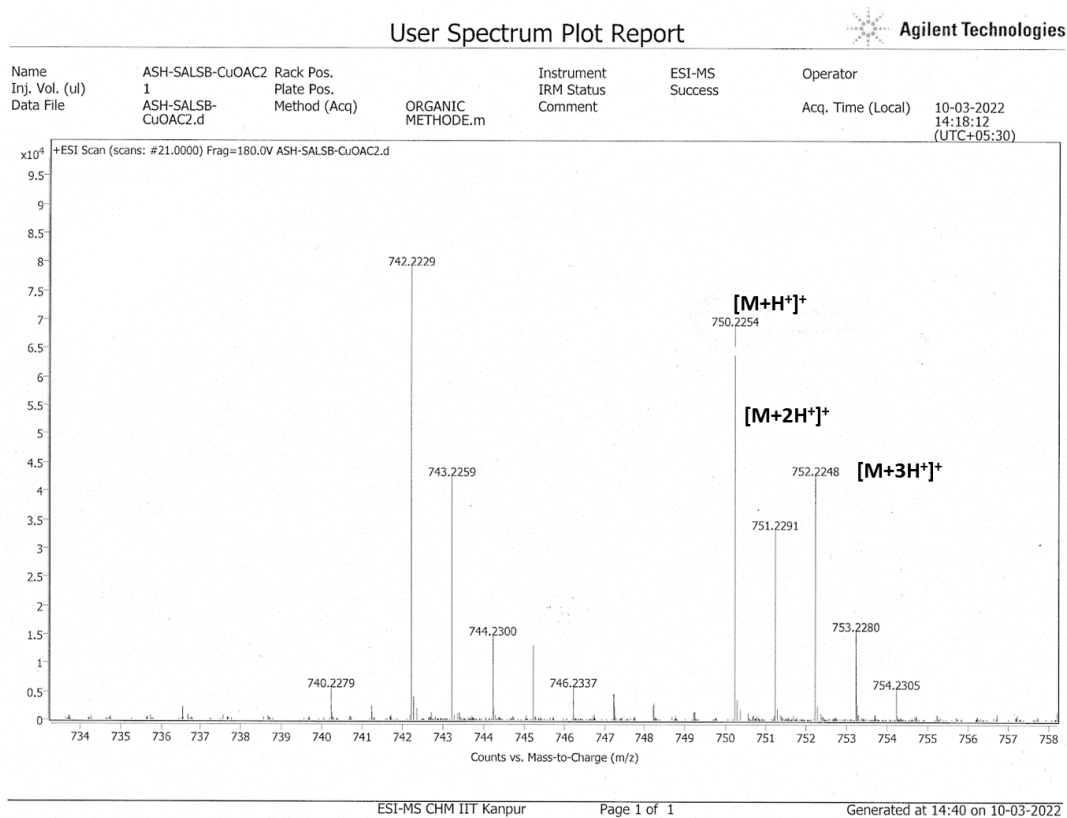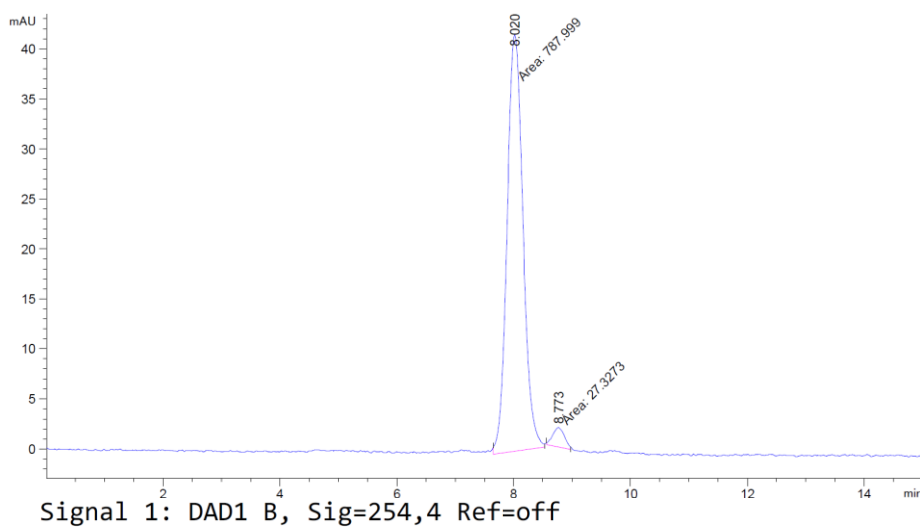

| Peak # | RetTime [min] | Type | Width [min] | Area [mAU*s] | Height [mAU] | Area %  |
|--------|---------------|------|-------------|--------------|--------------|---------|
| 1      | 8.020         | MM   | 0.3154      | 787.99945    | 41.63994     | 96.6483 |
| 2      | 8.773         | MM   | 0.2342      | 27.32733     | 1.94456      | 3.3517  |

# Characterization ESI-MS and HPLC of HL1

## User Spectrum Plot Report

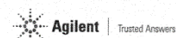

Name: ASH-BALD      Rack Pos.:      Instrument:      ESI-MS      Operator:  
 Inj. Vol. (ul): 1      Plate Pos.:      IRM Status:      Success  
 Data File: ASH-BALD-VE.d      Method (Acq): ORGANIC METHODE - Ve.m      Comment:      Acq. Time (Local): 22-11-2021 15:46:26 (UTC+05:30)

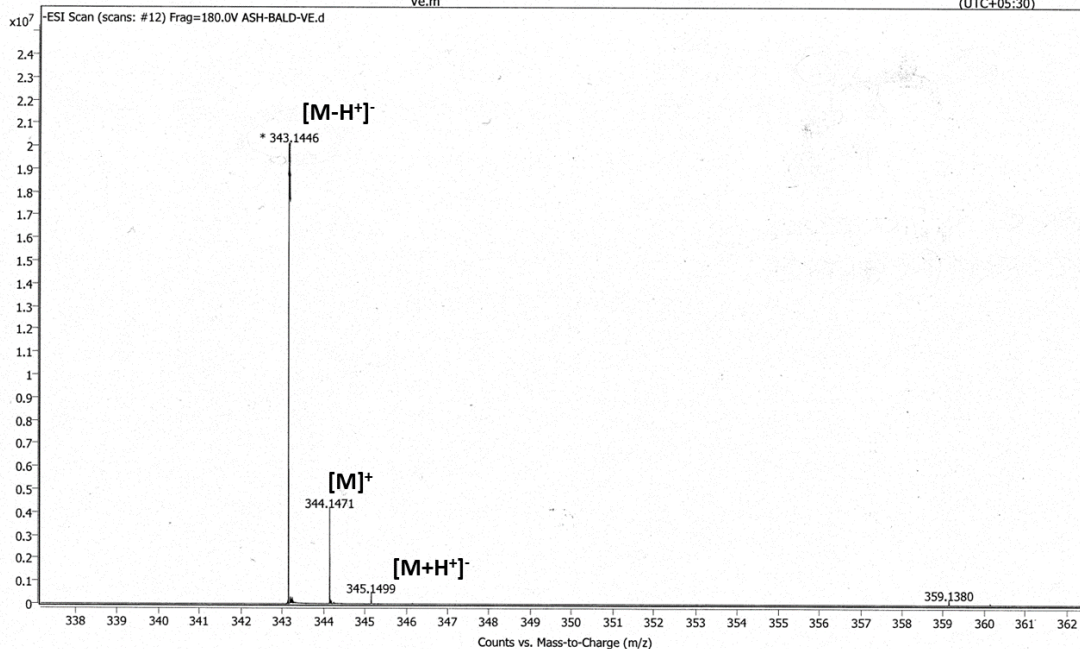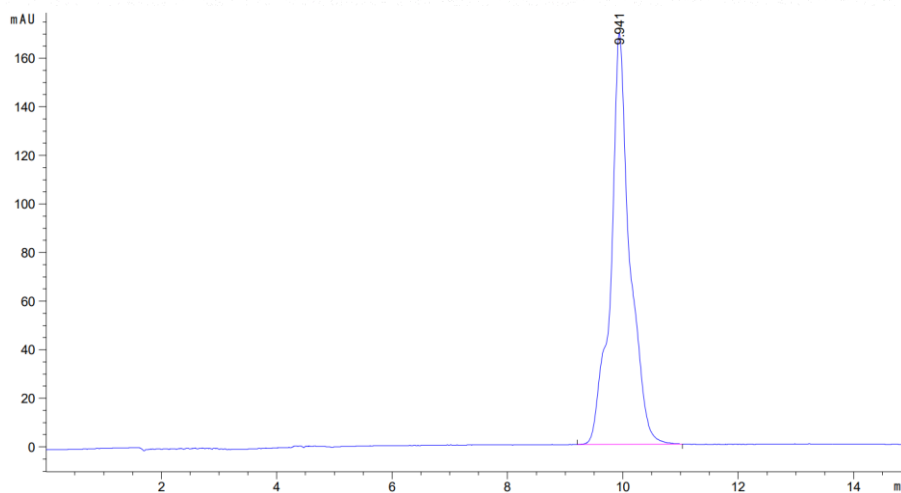

Signal 1: DAD1 B, Sig=254,4 Ref=off

| Peak # | RetTime [min] | Type | Width [min] | Area [mAU*s] | Height [mAU] | Area %   |
|--------|---------------|------|-------------|--------------|--------------|----------|
| 1      | 9.941         | BB   | 0.3202      | 3889.67334   | 169.18007    | 100.0000 |

Figure S10: Characterization ESI-MS and HPLC of Cu(L2)<sub>2</sub>

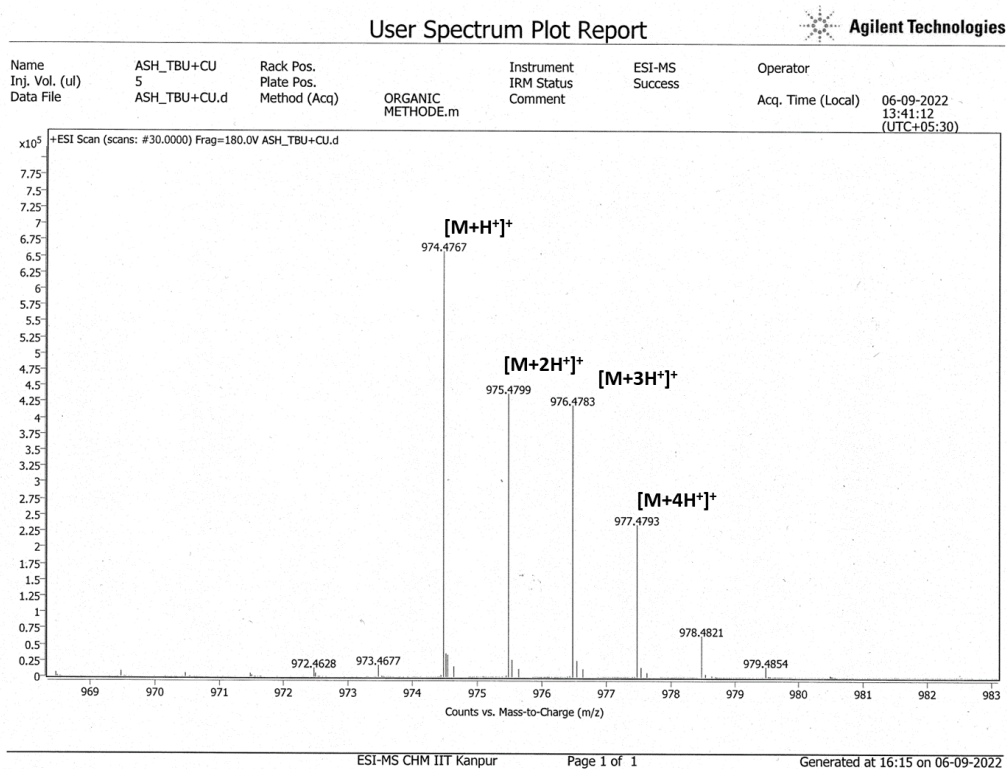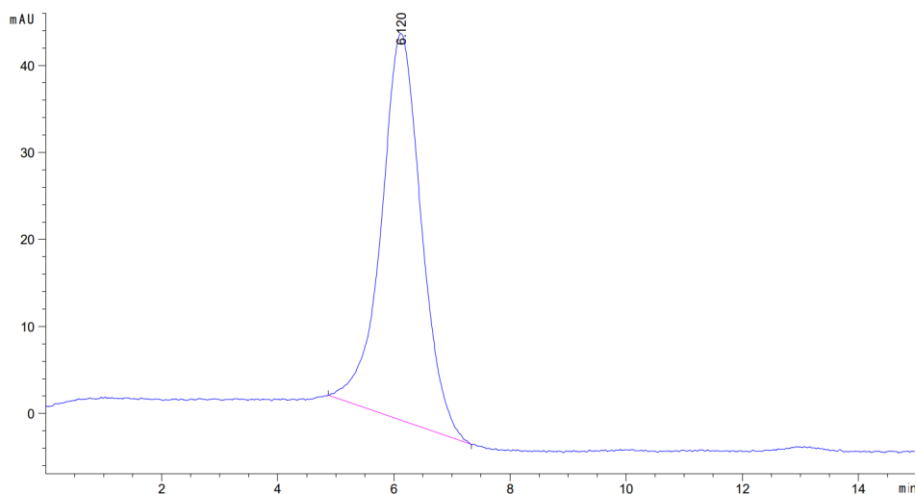

| Peak # | RetTime [min] | Type | Width [min] | Area [mAU*s] | Height [mAU] | Area %   |
|--------|---------------|------|-------------|--------------|--------------|----------|
| 1      | 6.120         | BB   | 0.6205      | 2126.85034   | 44.42670     | 100.0000 |

# Characterization ESI-MS and HPLC of HL2

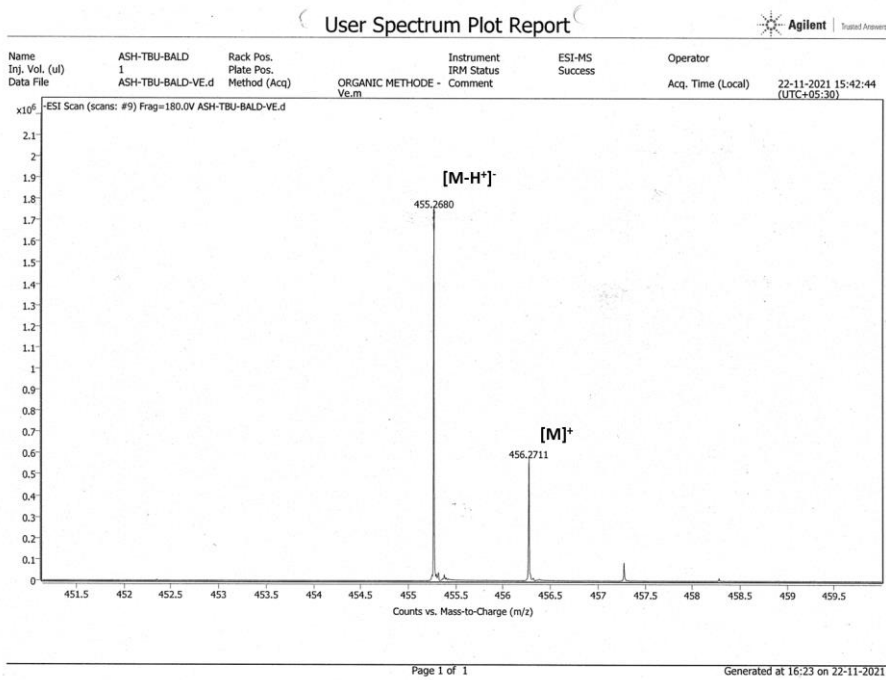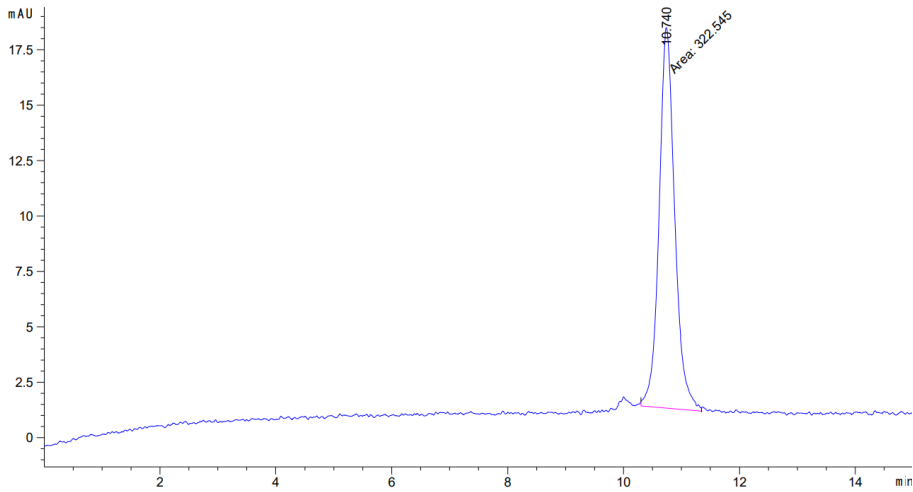

Signal 1: DAD1 B, Sig=254,4 Ref=off

| Peak # | RetTime [min] | Type | Width [min] | Area [mAU*s] | Height [mAU] | Area %   |
|--------|---------------|------|-------------|--------------|--------------|----------|
| 1      | 10.740        | MM   | 0.3131      | 322.54471    | 17.17070     | 100.0000 |



Figure S11: Characterization ESI-MS and HPLC of Cu(L3)<sub>2</sub>

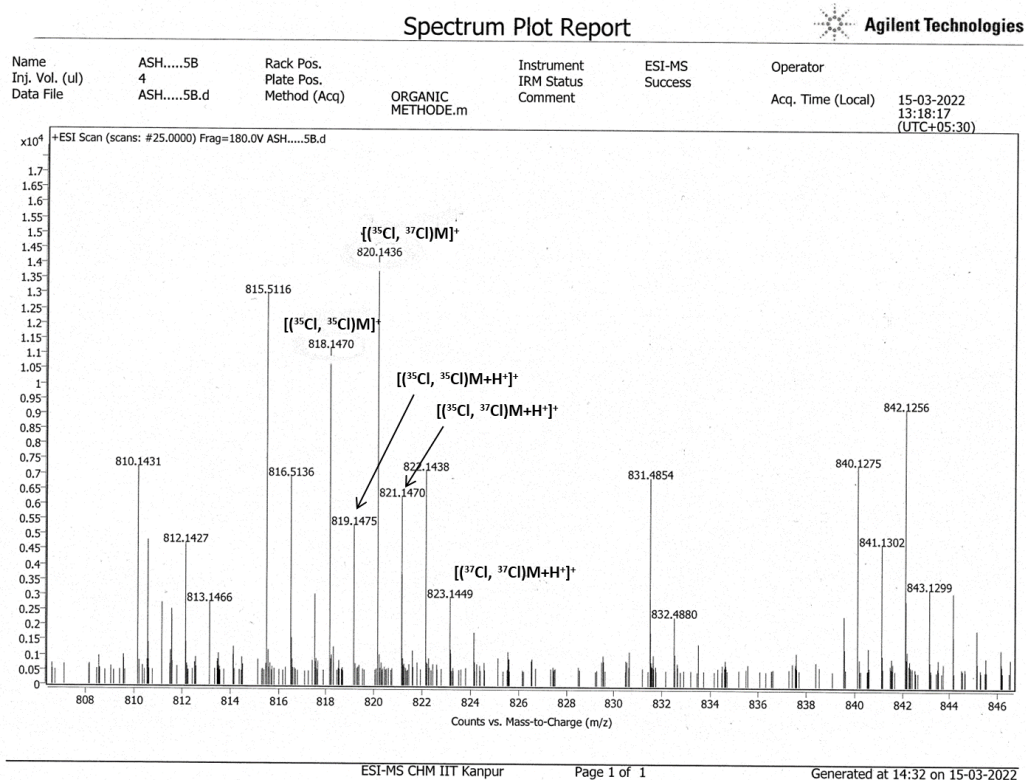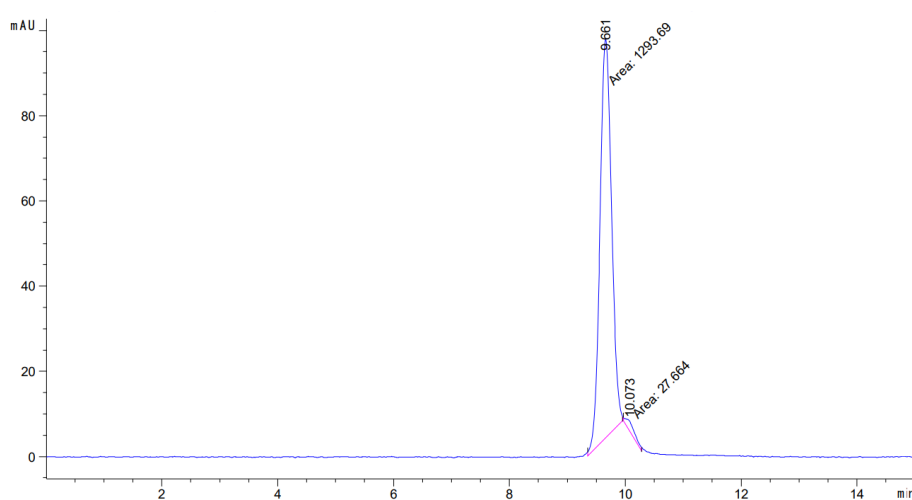

| Peak # | RetTime [min] | Type | Width [min] | Area [mAU*s] | Height [mAU] | Area %  |
|--------|---------------|------|-------------|--------------|--------------|---------|
| 1      | 9.661         | MM   | 0.2305      | 1293.69250   | 93.55347     | 97.9064 |
| 2      | 10.073        | MM   | 0.2019      | 27.66400     | 2.28311      | 2.0936  |

Characterization ESI-MS and HPLC of HL3

User Spectrum Plot Report

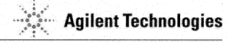

|                |                 |              |                 |         |                   |
|----------------|-----------------|--------------|-----------------|---------|-------------------|
| Name           | ASH.....SB      | Rack Pos.    | Instrument      | ESI-MS  | Operator          |
| Inj. Vol. (ul) | 4               | Plate Pos.   | IRM Status      | Success |                   |
| Data File      | ASH.....SB-VE.d | Method (Acq) | ORGANIC METHODE |         | Acq. Time (Local) |
|                |                 |              | -Ve.m           | Comment | 15-03-2022        |
|                |                 |              |                 |         | 14:55:36          |
|                |                 |              |                 |         | (UTC+05:30)       |

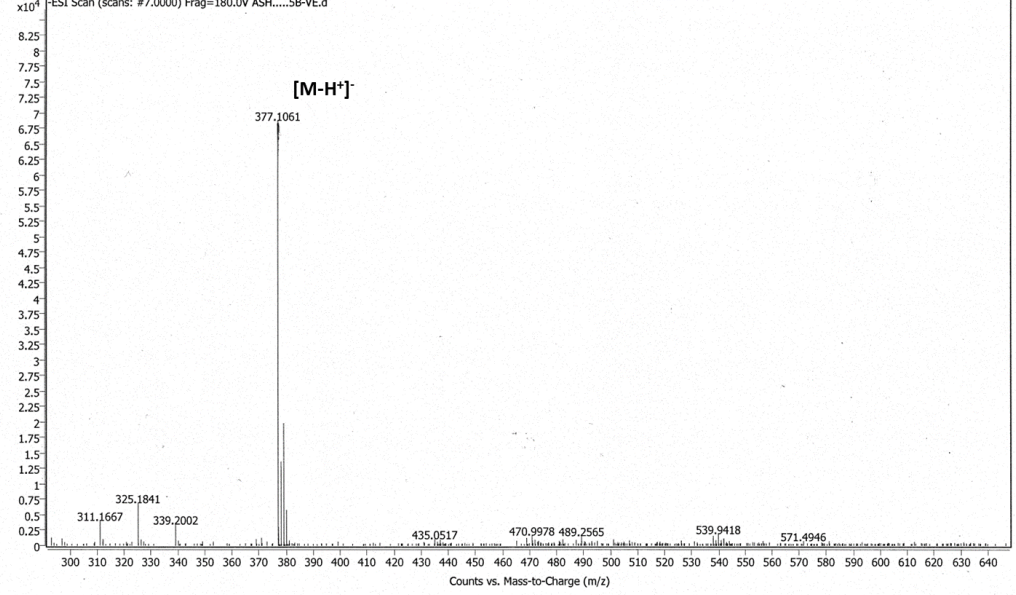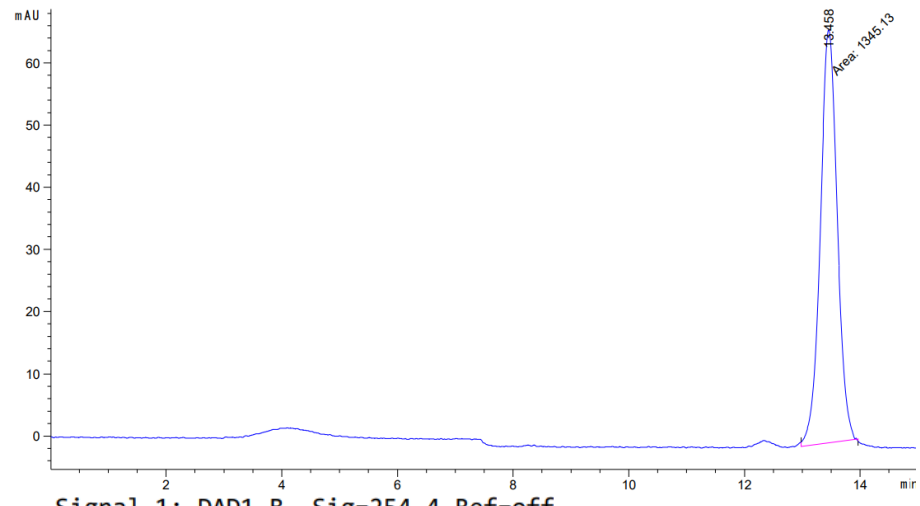

Signal 1: DAD1 B, Sig=254,4 Ref=off

| Peak # | RetTime [min] | Type | Width [min] | Area [mAU*s] | Height [mAU] | Area %   |
|--------|---------------|------|-------------|--------------|--------------|----------|
| 1      | 13.458        | MM   | 0.3373      | 1345.13049   | 66.45680     | 100.0000 |

Figure S12: Characterization ESI-MS and HPLC of Cu(L4)<sub>2</sub>

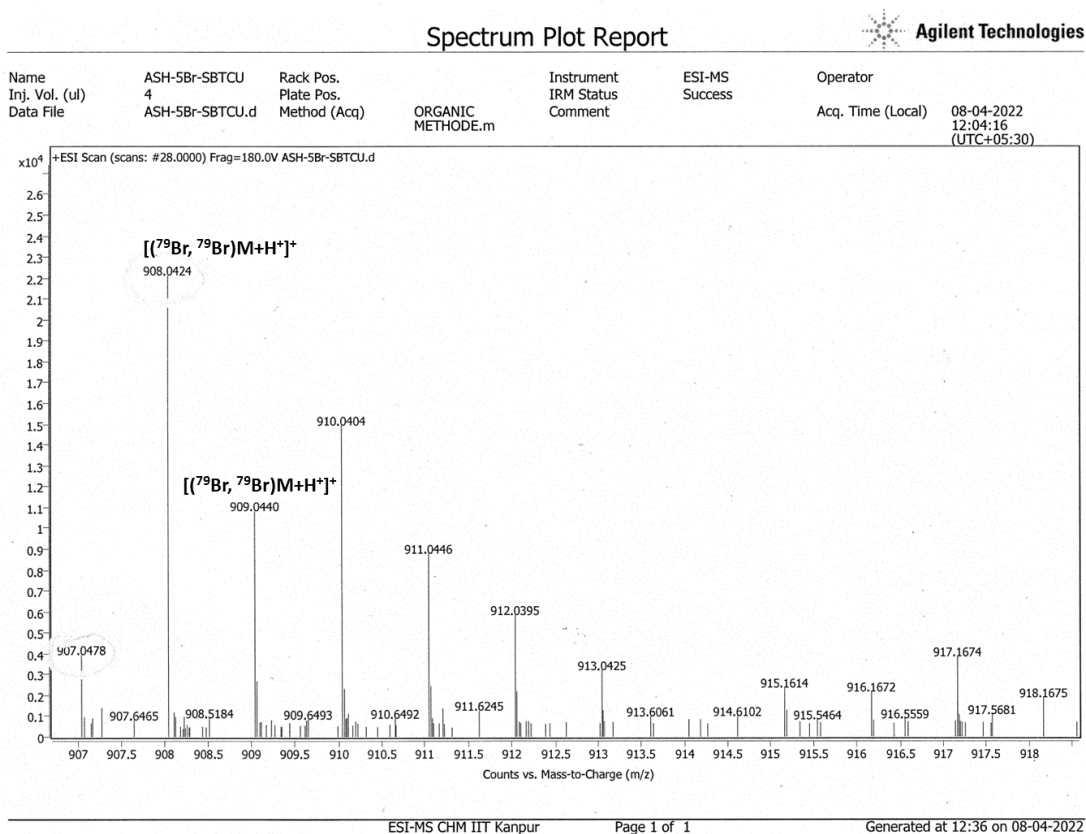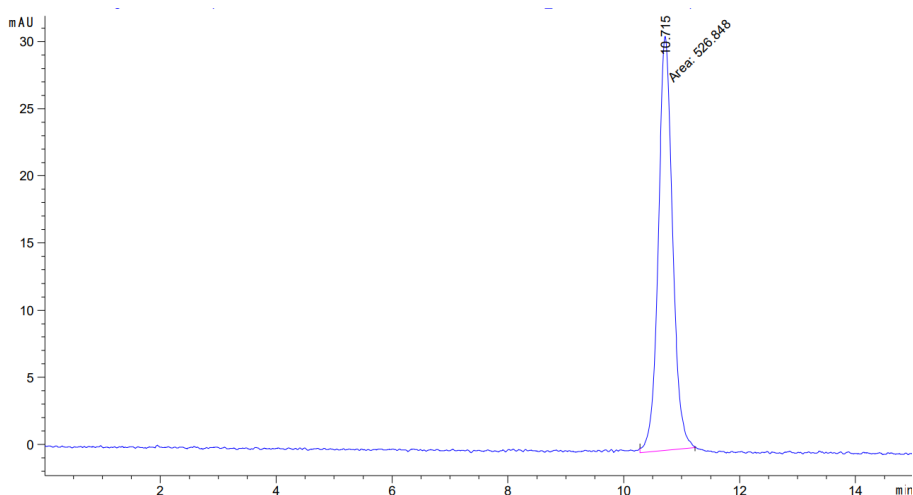

Signal 1: DAD1 B, Sig=254,4 Ref=off

| Peak # | RetTime [min] | Type | Width [min] | Area [mAU*s] | Height [mAU] | Area %   |
|--------|---------------|------|-------------|--------------|--------------|----------|
| 1      | 10.715        | MM   | 0.2845      | 526.84766    | 30.86158     | 100.0000 |

Characterization ESI-MS and HPLC of HL4

User Spectrum Plot Report

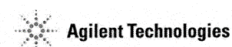

|                |               |              |                 |         |                   |
|----------------|---------------|--------------|-----------------|---------|-------------------|
| Name           | ASH-5BR-5BR   | Rack Pos.    | Instrument      | ESI-MS  | Operator          |
| Inj. Vol. (ul) | 4             | Plate Pos.   | IRM Status      | Success |                   |
| Data File      | ASH-5BR-5BR.d | Method (Acq) | ORGANIC METHODE | -Ve.m   | Acq. Time (Local) |
|                |               |              |                 |         | 12-04-2022        |
|                |               |              |                 |         | 15:28:15          |
|                |               |              |                 |         | (UTC+05:30)       |

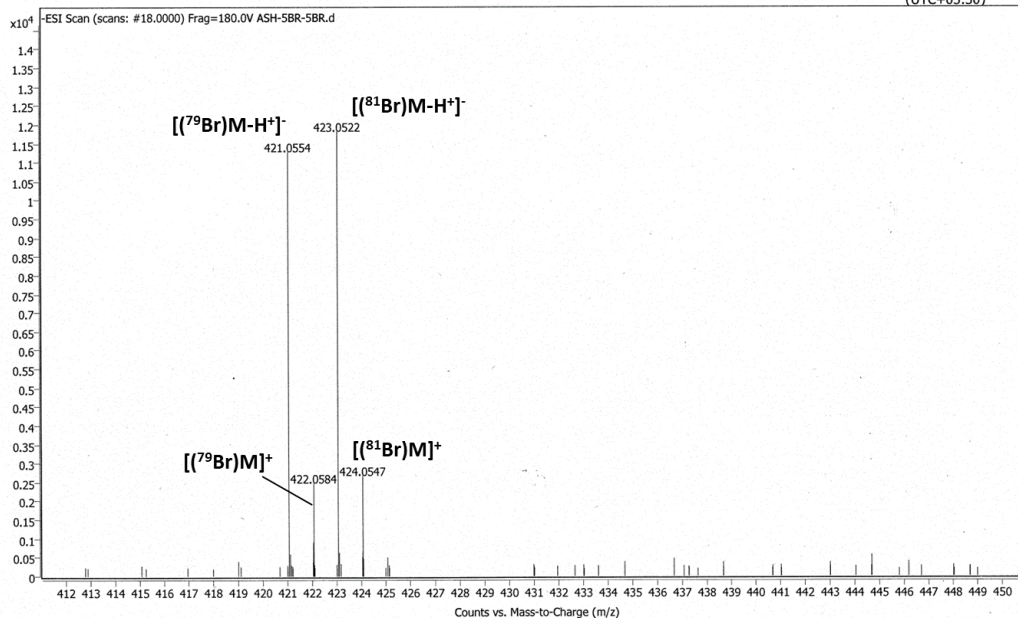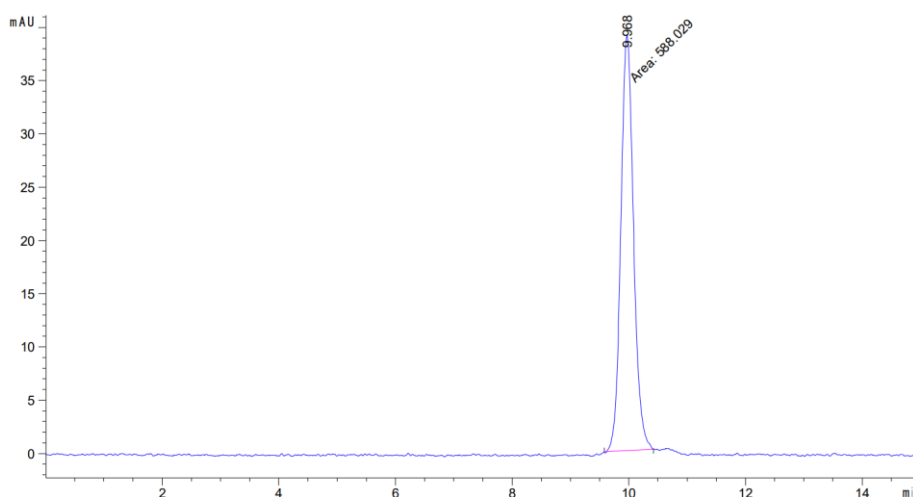

Signal 1: DAD1 B, Sig=254,4 Ref=off

| Peak # | RetTime [min] | Type | Width [min] | Area [mAU*s] | Height [mAU] | Area %   |
|--------|---------------|------|-------------|--------------|--------------|----------|
| 1      | 9.968         | MM   | 0.2517      | 588.02869    | 38.93793     | 100.0000 |

Figure S13: Characterization ESI-MS and HPLC of Cu(L5)<sub>2</sub>

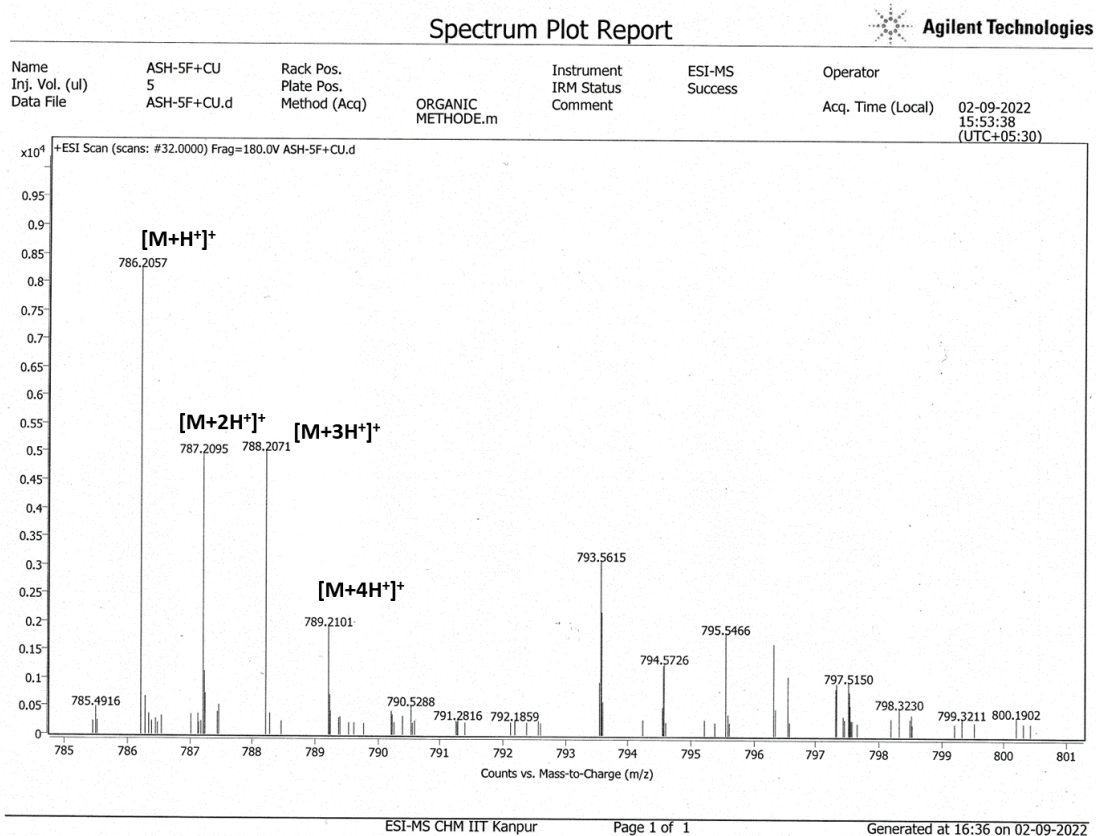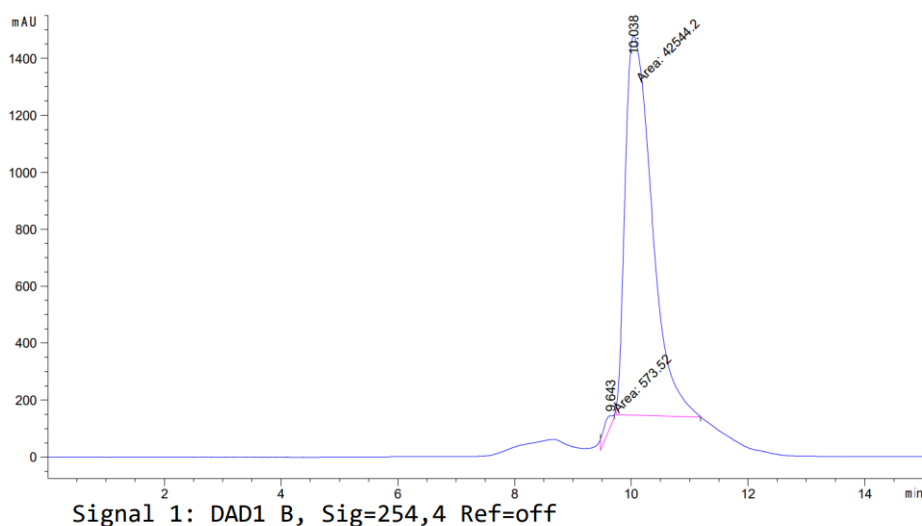

| Peak # | RetTime [min] | Type | Width [min] | Area [mAU*s] | Height [mAU] | Area %  |
|--------|---------------|------|-------------|--------------|--------------|---------|
| 1      | 9.643         | MM   | 0.2449      | 573.51996    | 39.02641     | 1.3301  |
| 2      | 10.038        | MM   | 0.5328      | 4.25442e4    | 1330.92615   | 98.6699 |

# Characterization ESI-MS and HPLC of HL5

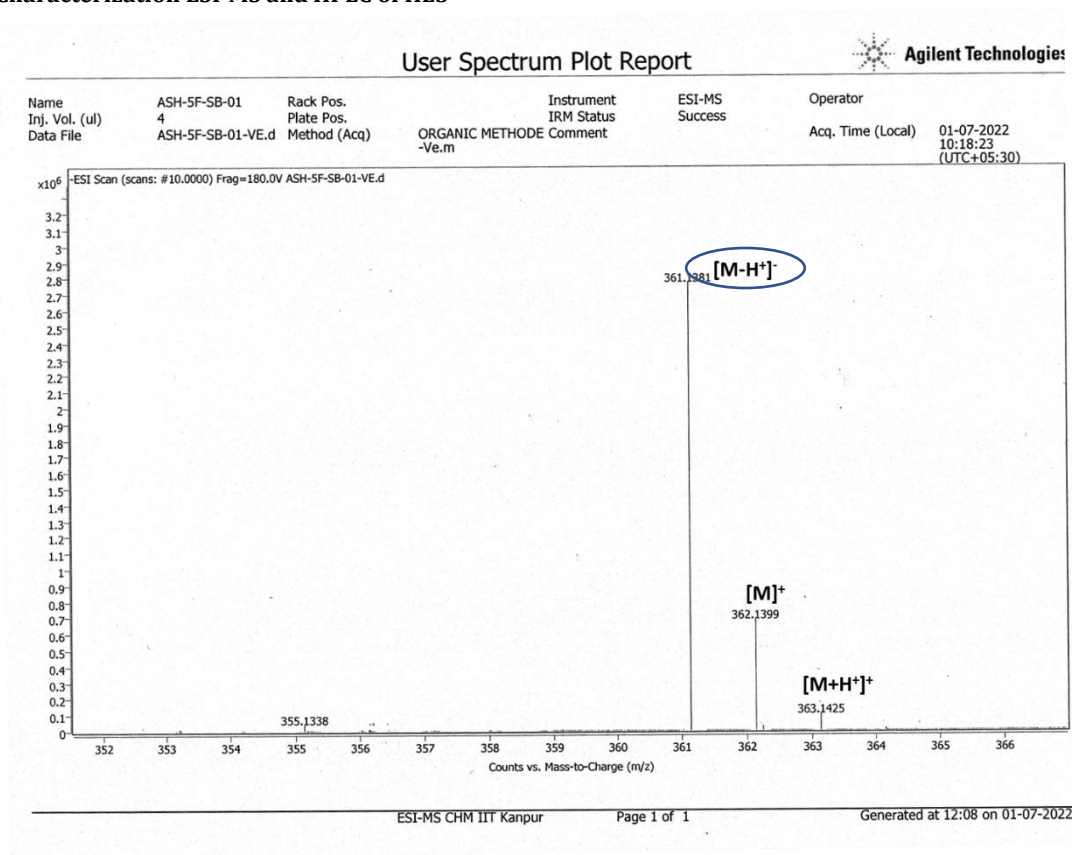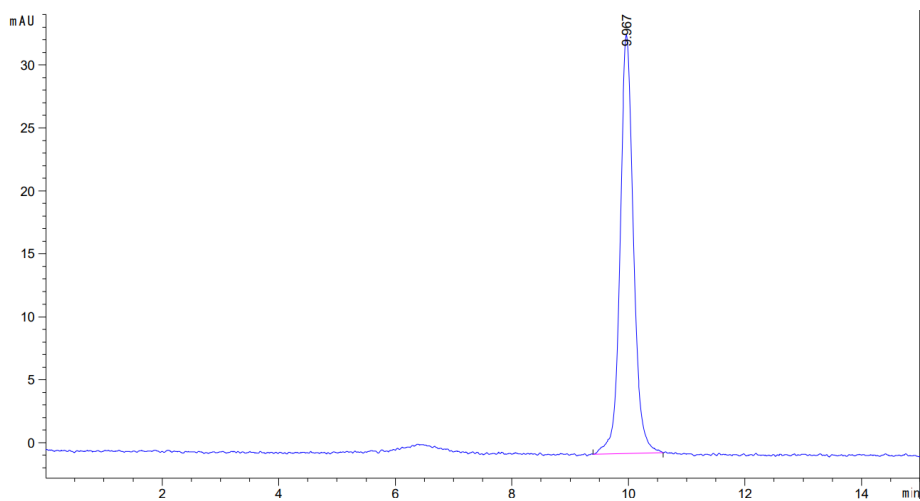

Signal 1: DAD1 B, Sig=254,4 Ref=off

| Peak # | RetTime [min] | Type | Width [min] | Area [mAU*s] | Height [mAU] | Area %   |
|--------|---------------|------|-------------|--------------|--------------|----------|
| 1      | 9.967         | BB   | 0.2461      | 530.71185    | 33.26481     | 100.0000 |



Figure S14: Characterization ESI-MS and HPLC of Cu(L6)<sub>2</sub>

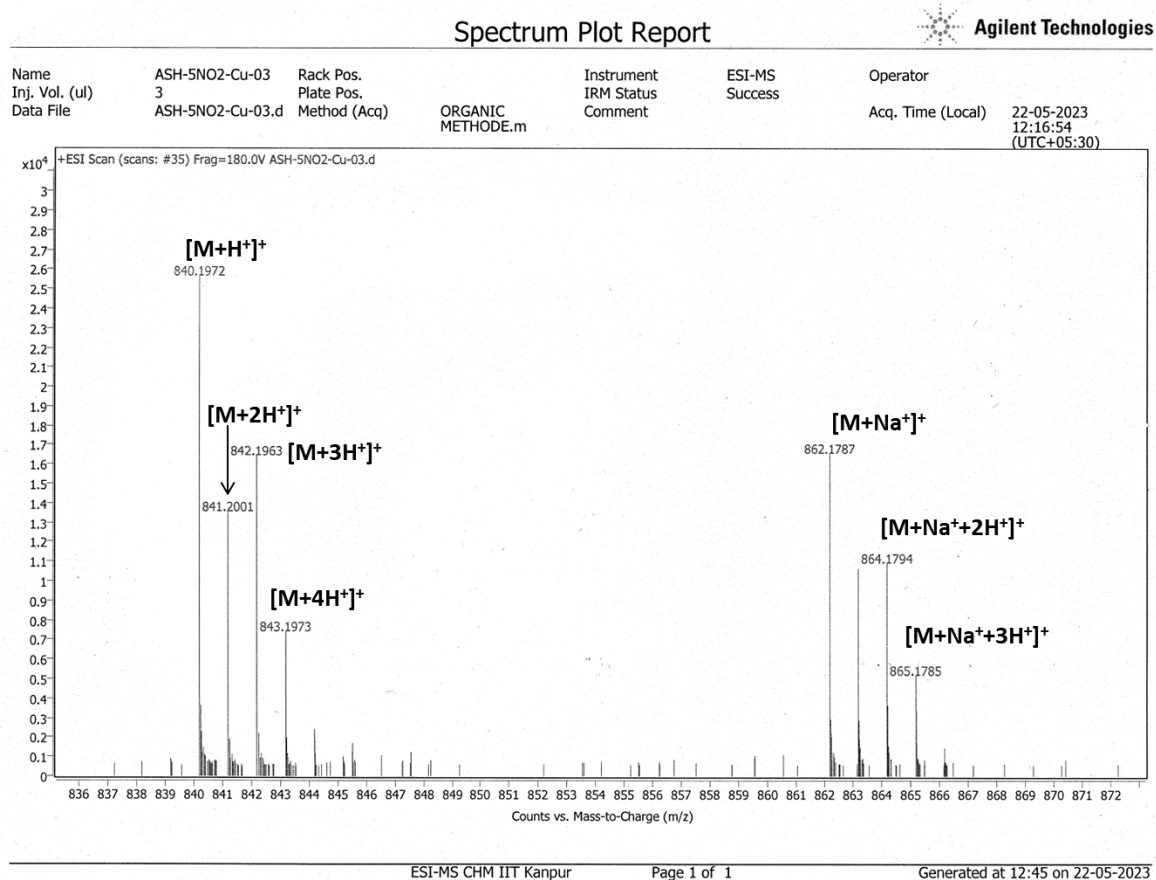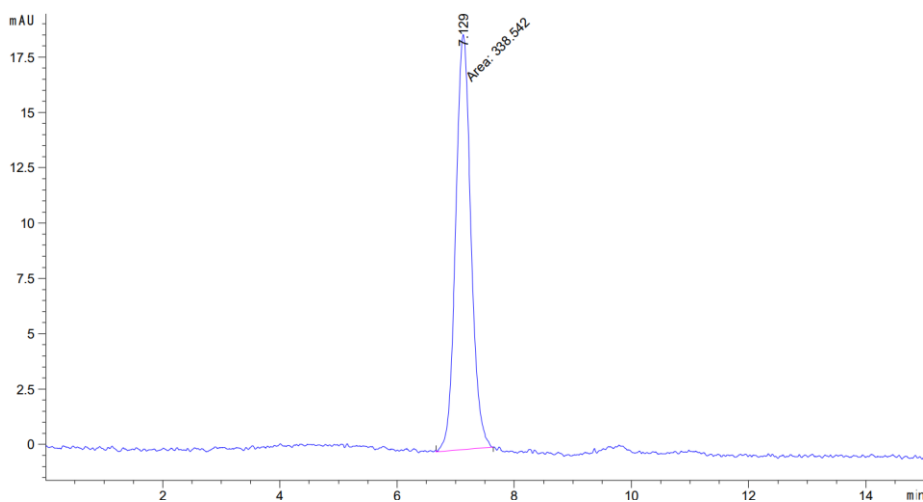

Signal 1: DAD1 B, Sig=254,4 Ref=off

| Peak # | RetTime [min] | Type | Width [min] | Area [mAU*s] | Height [mAU] | Area %   |
|--------|---------------|------|-------------|--------------|--------------|----------|
| 1      | 7.129         | MM   | 0.3010      | 338.54233    | 18.74357     | 100.0000 |

# Characterization ESI-MS and HPLC of HL6

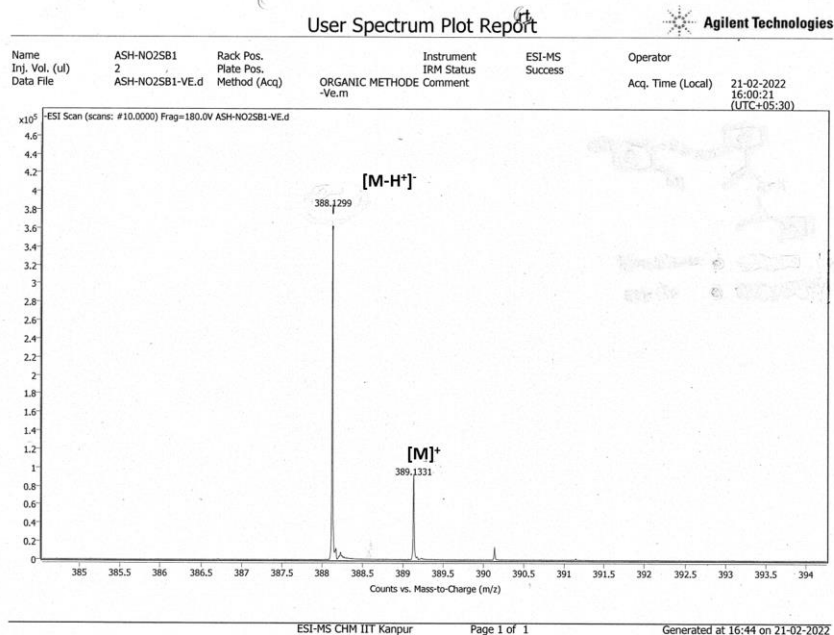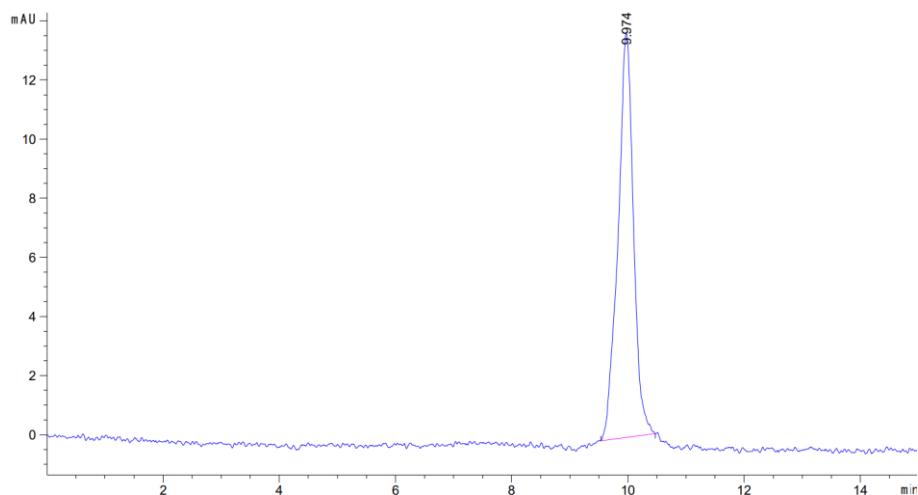

| Peak # | RetTime [min] | Type | Width [min] | Area [mAU*s] | Height [mAU] | Area %   |
|--------|---------------|------|-------------|--------------|--------------|----------|
| 1      | 9.974         | BB   | 0.2682      | 253.33157    | 13.67233     | 100.0000 |



Figure S15: Characterization ESI-MS and HPLC of Cu(L7)<sub>2</sub>

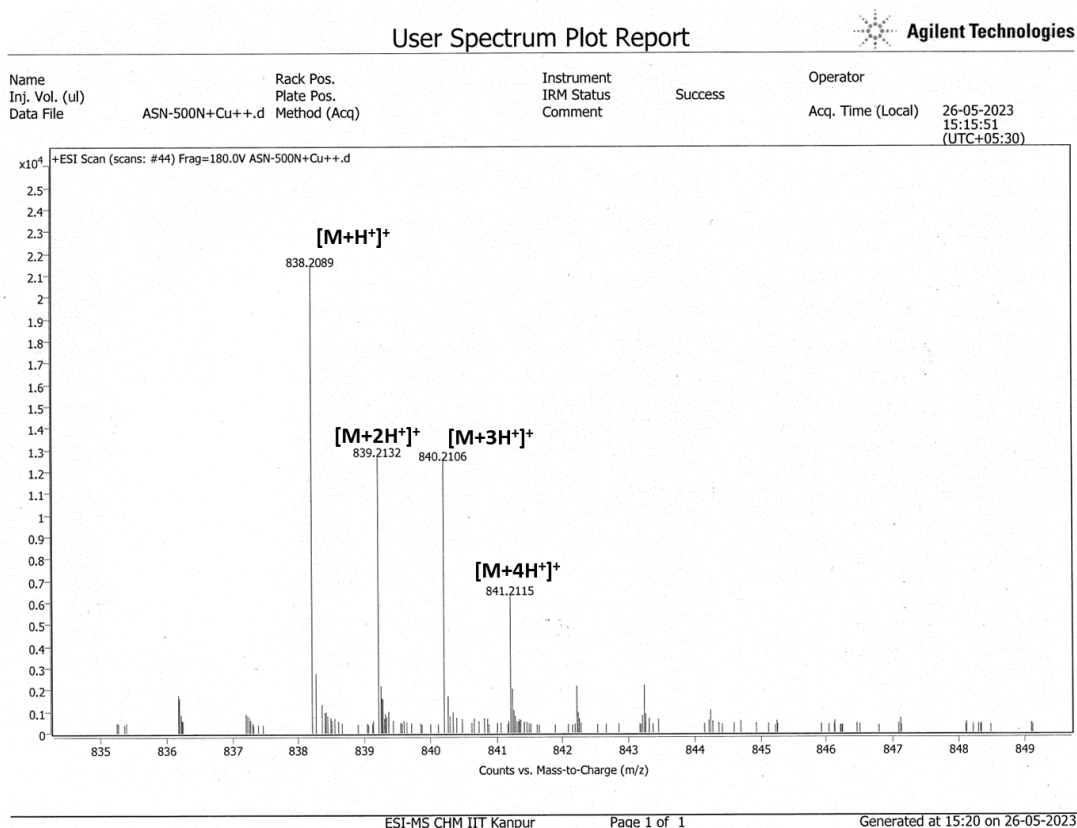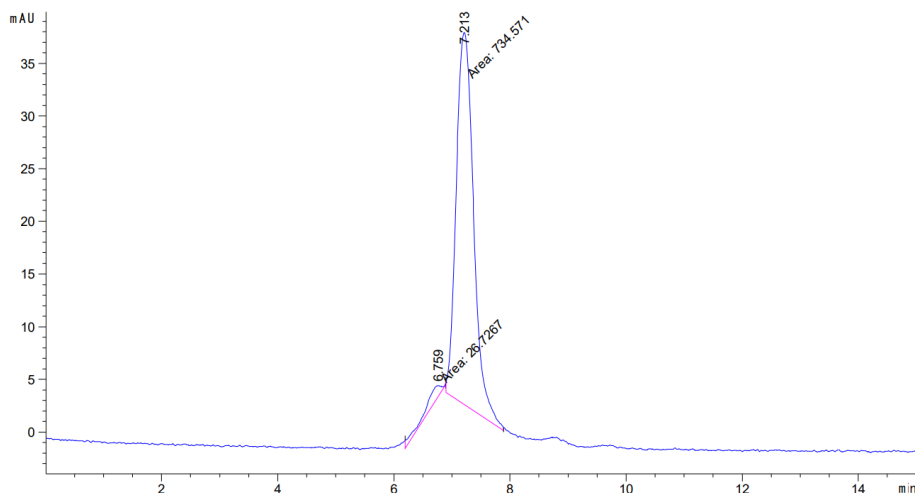

Signal 1: DAD1 B, Sig=254,4 Ref=off

| Peak # | RetTime [min] | Type | Width [min] | Area [mAU*s] | Height [mAU] | Area %  |
|--------|---------------|------|-------------|--------------|--------------|---------|
| 1      | 6.759         | MM   | 0.2908      | 26.72666     | 1.09632      | 3.5107  |
| 2      | 7.213         | MM   | 0.3467      | 734.57123    | 35.31448     | 96.4893 |

Characterization ESI-MS and HPLC of HL7

User Spectrum Plot Report

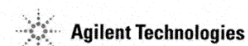

Name: ASH\_PHBAF\_SB    Rack Pos.:    Instrument:    ESI-MS:    Operator:  
 Inj. Vol. (ul): 1    Plate Pos.:    IRM Status:    Success:  
 Data File: ASH\_PHBAF\_SB.-VE.d    Method (Acq): ORGANIC METHODE Comment    Acq. Time (Local): 02-02-2022 16:07:53 (UTC+05:30)

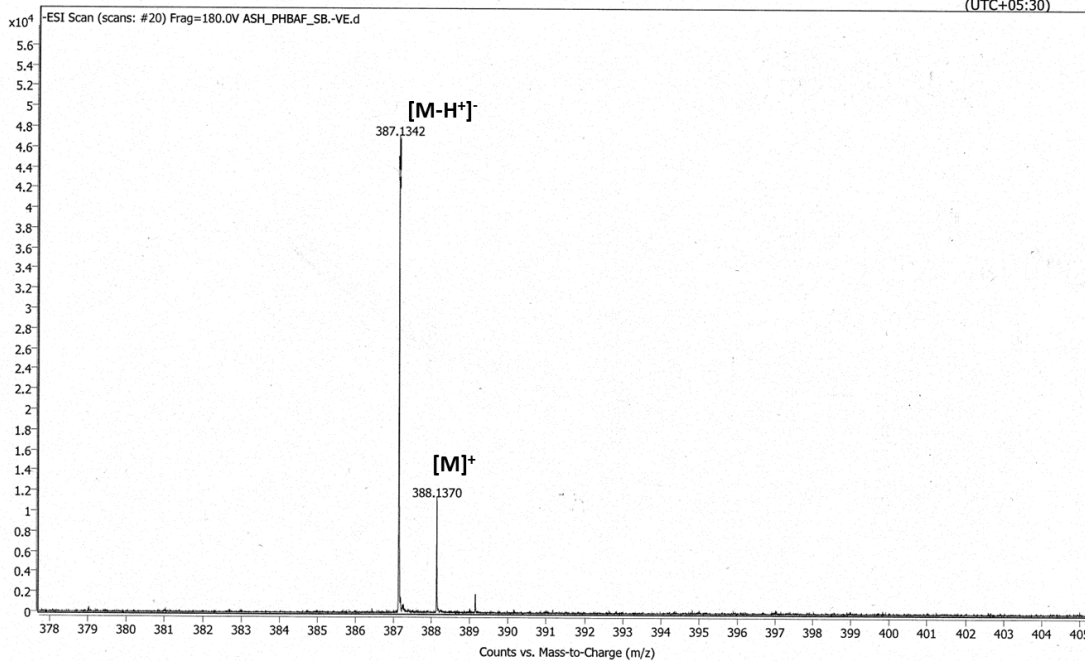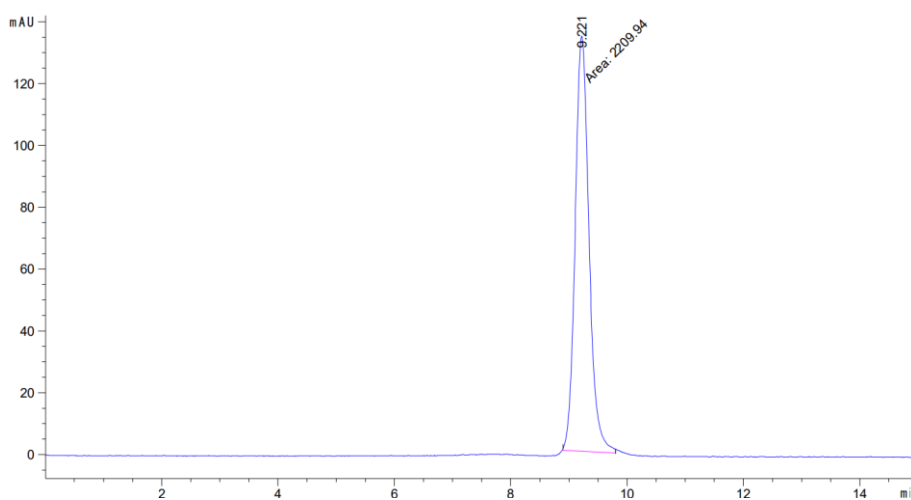

| Peak # | RetTime [min] | Type | Width [min] | Area [mAU*s] | Height [mAU] | Area %   |
|--------|---------------|------|-------------|--------------|--------------|----------|
| 1      | 9.221         | MM   | 0.2744      | 2209.94409   | 134.24728    | 100.0000 |

Figure S16: Characterization ESI-MS and HPLC of Cu(L8)<sub>2</sub>

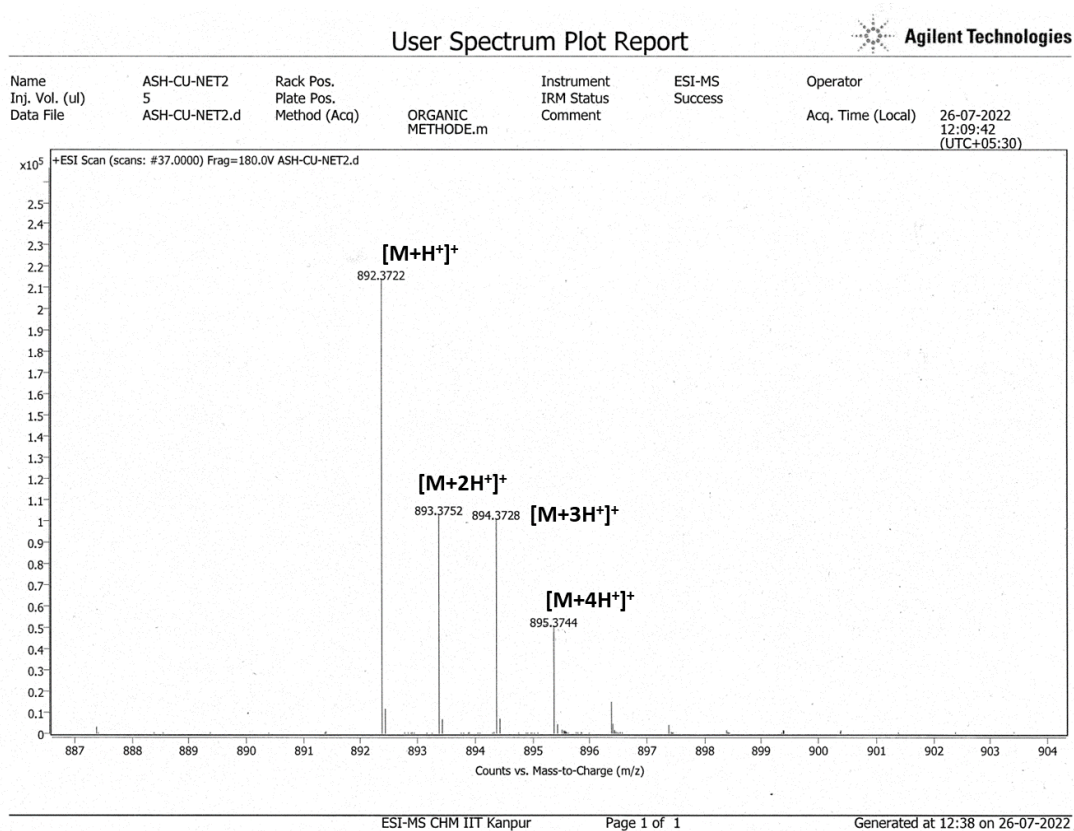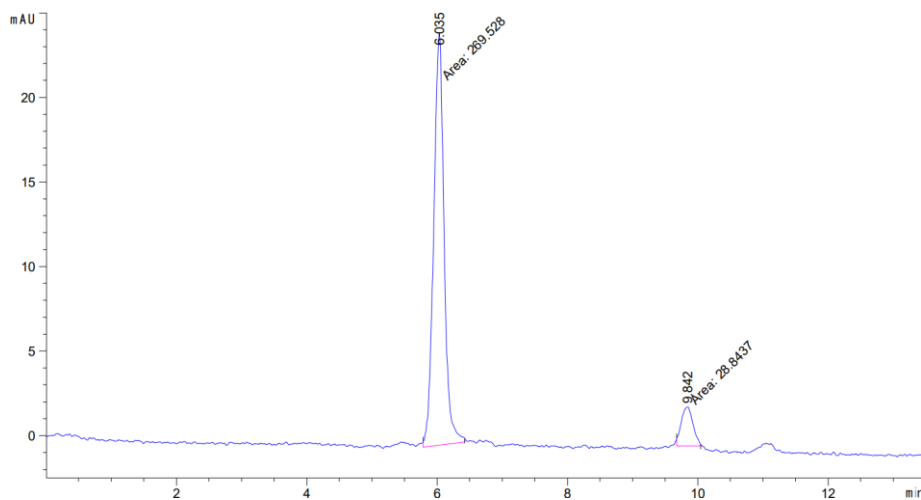

| Peak # | RetTime [min] | Type | Width [min] | Area [mAU*s] | Height [mAU] | Area %  |
|--------|---------------|------|-------------|--------------|--------------|---------|
| 1      | 6.035         | MM   | 0.1843      | 269.52768    | 24.37045     | 90.3330 |
| 2      | 9.842         | MM   | 0.2085      | 28.84371     | 2.30580      | 9.6670  |

# Characterization ESI-MS and HPLC of HL8

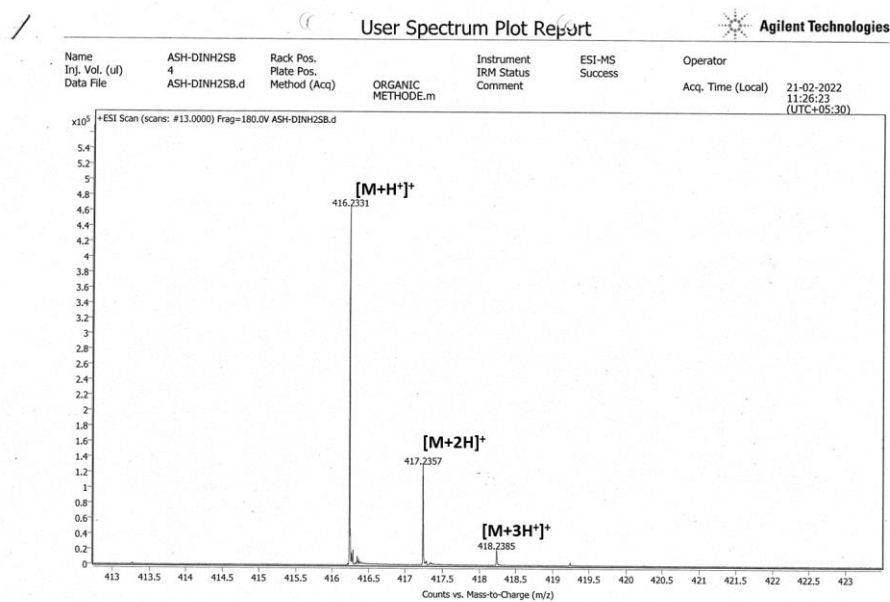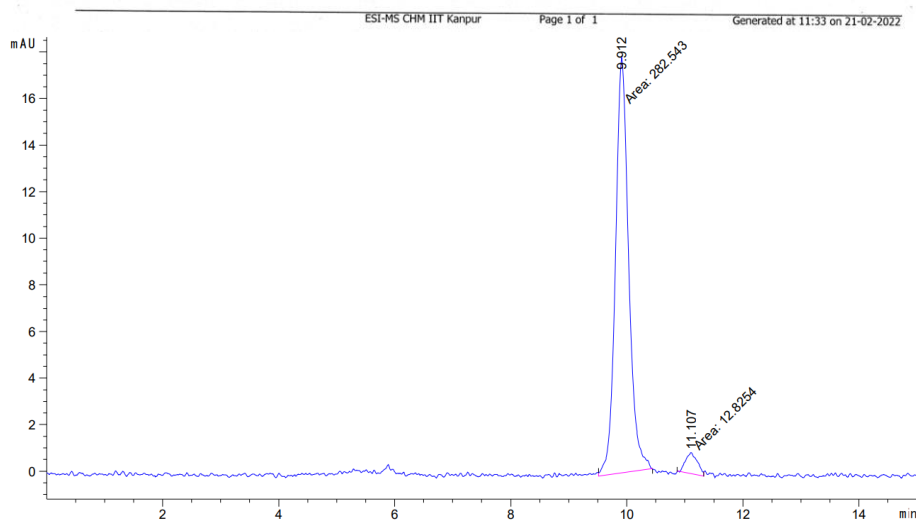

Signal 1: DAD1 B, Sig=254,4 Ref=off

| Peak # | RetTime [min] | Type | Width [min] | Area [mAU*s] | Height [mAU] | Area %  |
|--------|---------------|------|-------------|--------------|--------------|---------|
| 1      | 9.912         | MM   | 0.2642      | 282.54321    | 17.82419     | 95.6578 |
| 2      | 11.107        | MM   | 0.2349      | 12.82540     | 9.09826e-1   | 4.3422  |

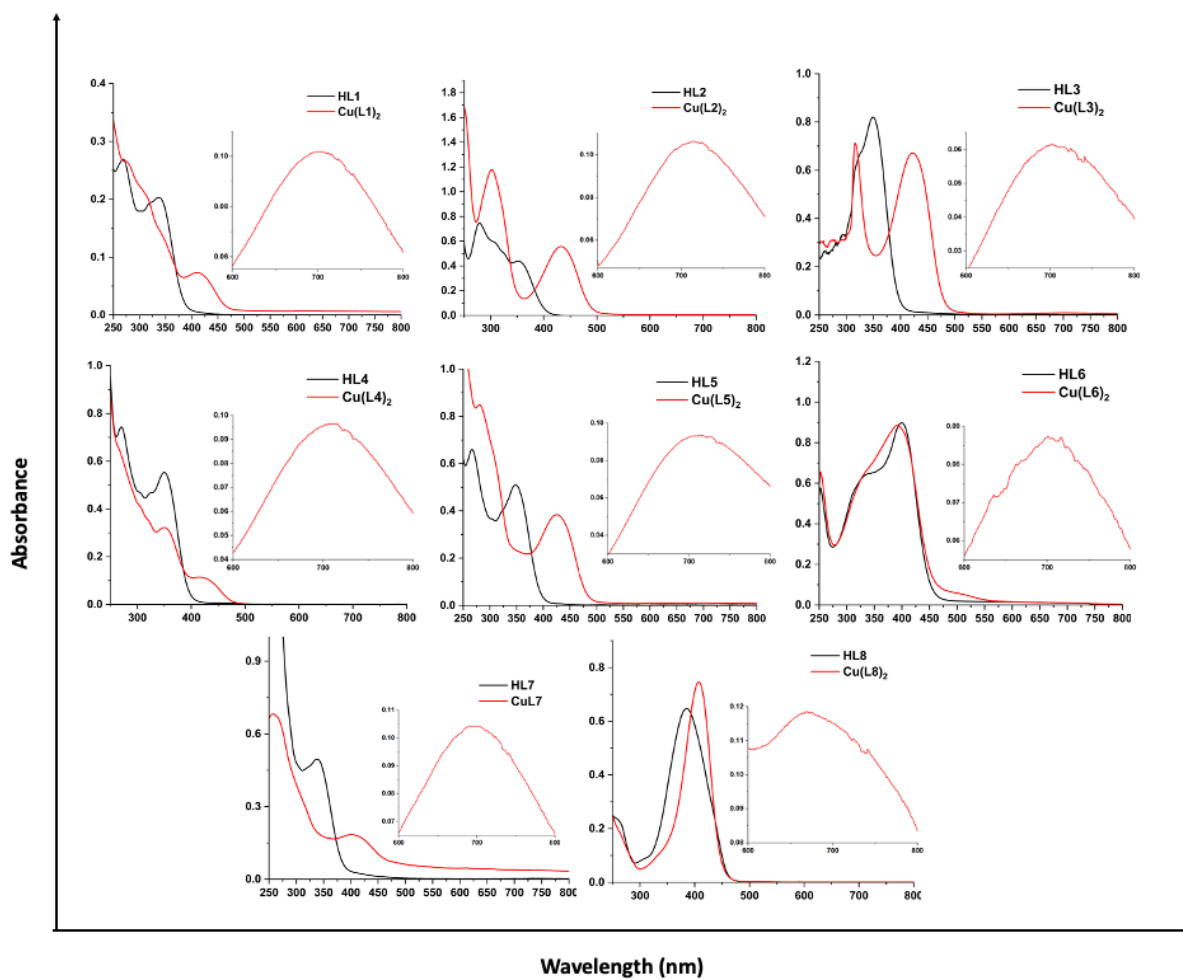

**Figure S17:** UV-visible absorption spectra of ligands **HL1-HL8**, complexes **Cu(L1)<sub>2</sub>-Cu(L8)<sub>2</sub>** recorded at room temperature in methanol.

## UV-visible Spectroscopic Titration and Binding Isotherm

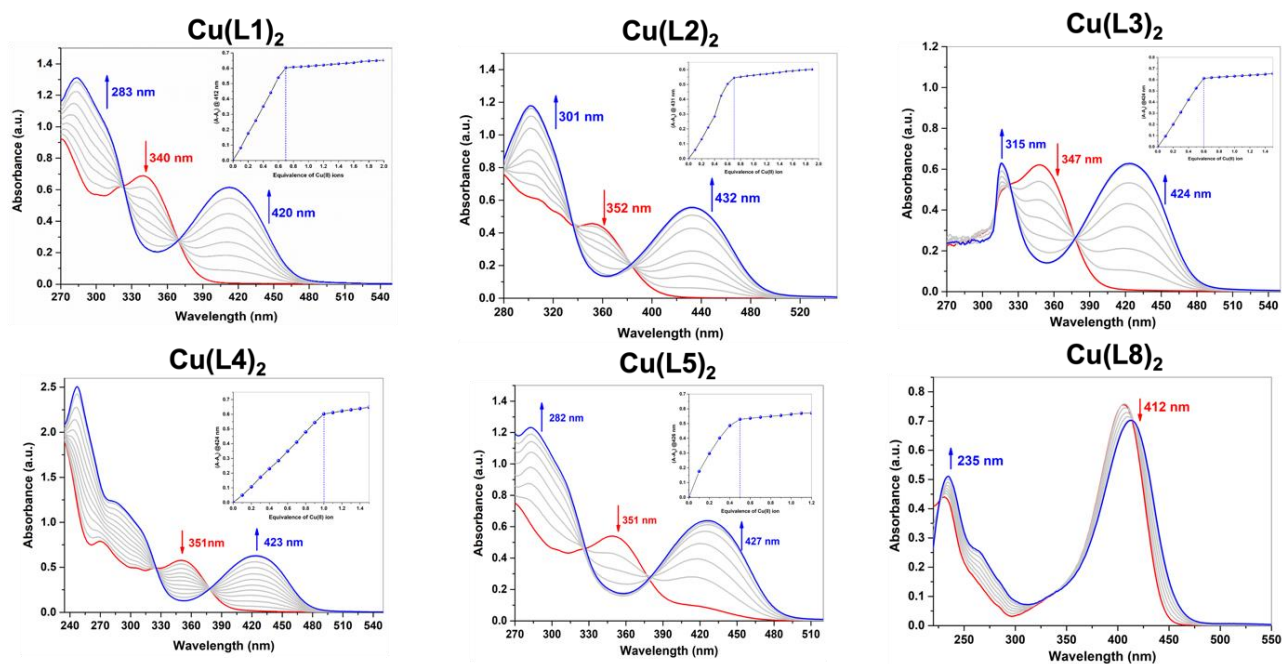

**Figure S18:** UV-visible absorption spectra were obtained on a JASCO V-770 UV-Visible-NIR spectrophotometer equipped at 25.0 °C. For Cu(II) titration experiments, a stock solution of  $\text{Cu(OAc)}_2 \cdot \text{H}_2\text{O}$  (25.8  $\mu\text{M}$ ) was prepared in dry methanol. Additions (0–1.5 equiv. Cu(II)) to the ligands **HL1–HL8** solution in methanol were carried out with a glass syringe. After each addition, the solution was allowed to equilibrate.

## Infrared Spectroscopic Characterization

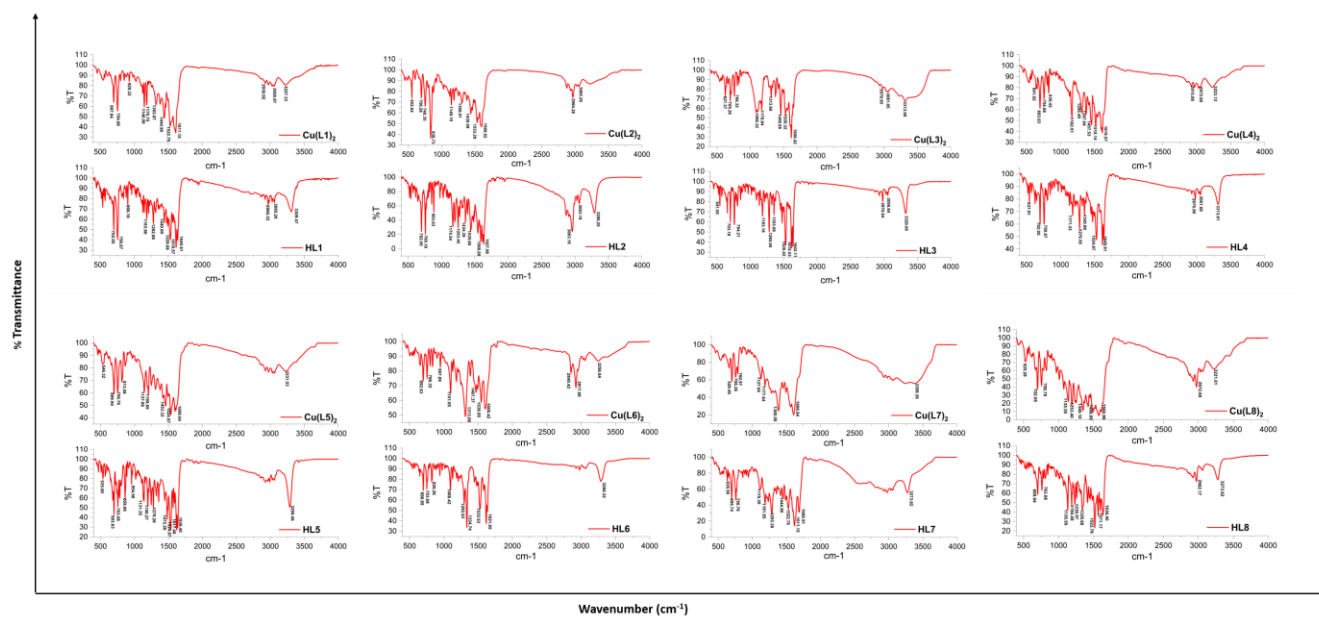

**Figure S19:** The FT-IR spectra of the ligands **HL1-HL8** and complexes **Cu(L1)<sub>2</sub>-Cu(L8)<sub>2</sub>** recorded at room temperature.

### Electron Paramagnetic Resonance Data.

The X-band EPR spectrum of  $\text{Cu(L1)}_2 - \text{Cu(L8)}_2$  was recorded at room temperature. The EPR spectrum of the complex provides a very constructive information about the extent of the delocalization of unpaired electron and gives valuable information concerning the environment present around the  $\text{Cu(II)}$  ion. The EPR spectrum of the powdered complex at 300 K, showed signal having  $g_{\perp}$ ,  $g_{\parallel}$  and  $g_{\text{iso}}$  in the range 2.123- 2.048, 2.433-2.210 and 2.12-2.05.

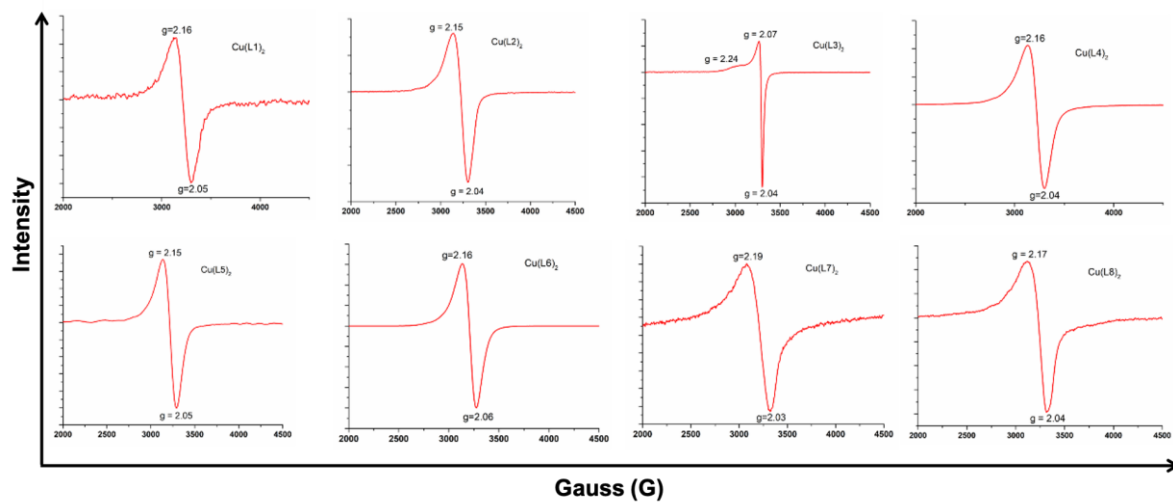

Figure S20: The X-band EPR spectra of the complexes  $\text{Cu(L1)}_2 - \text{Cu(L8)}_2$  recorded at room temperature.



## Single Crystal X-Ray Diffraction Characterization

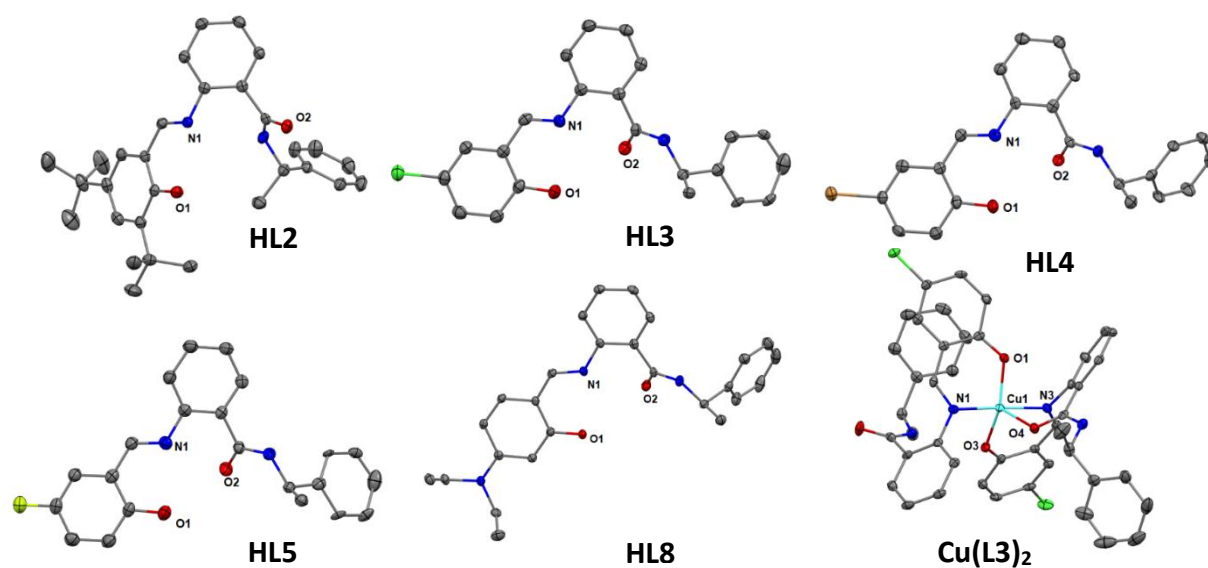

**Figure S21:** Thermal ellipsoid plot (50 % probability) of HL2, HL3-HL5, HL8 and Cu(L3)<sub>2</sub> Nonessential hydrogen atoms omitted for clarity (nitrate ion and water molecule are omitted for clarity from HL8).

**Table S1** Crystal data and refinement parameters of ligands

| CCDC<br>Identification code          | 2252221<br>HL2                                                | 2251966<br>HL3                                                         | 2251968<br>HL4                                                                | 2251967<br>HL5                                                                 | 2251965<br>HL8                                                |
|--------------------------------------|---------------------------------------------------------------|------------------------------------------------------------------------|-------------------------------------------------------------------------------|--------------------------------------------------------------------------------|---------------------------------------------------------------|
| Chemical formula                     | C <sub>30</sub> H <sub>36</sub> N <sub>2</sub> O <sub>2</sub> | C <sub>22.10</sub> H <sub>19.70</sub> Cl N <sub>2</sub> O <sub>2</sub> | C <sub>44</sub> H <sub>36</sub> Br <sub>2</sub> N <sub>4</sub> O <sub>4</sub> | C <sub>44</sub> H <sub>39.2</sub> F <sub>2</sub> N <sub>4</sub> O <sub>4</sub> | C <sub>26</sub> H <sub>30</sub> N <sub>4</sub> O <sub>6</sub> |
| Formula weight                       | 456.61                                                        | 380.75                                                                 | 844.59                                                                        | 725.99                                                                         | 494.54                                                        |
| Temperature                          | 100                                                           | 100                                                                    | 100                                                                           | 100                                                                            | 100                                                           |
| Wavelength                           | 0.71073                                                       | 0.71073                                                                | 0.71073                                                                       | 0.71073                                                                        | 0.71073                                                       |
| Crystal size                         | 0.25 × 0.23 ×<br>0.15                                         | 0.25 × 0.21 × 0.16                                                     | 0.28 × 0.28 ×<br>0.18                                                         | 0.27 × 0.25 × 0.16                                                             | 0.26 × 0.25 ×<br>0.18                                         |
| Crystal system                       | orthorhombic                                                  | monoclinic                                                             | monoclinic                                                                    | monoclinic                                                                     | triclinic                                                     |
| Space group                          | P2 <sub>1</sub> 2 <sub>1</sub> 2 <sub>1</sub>                 | P2 <sub>1</sub>                                                        | P2 <sub>1</sub>                                                               | P2 <sub>1</sub>                                                                | P1                                                            |
| Unit cell dimensions                 |                                                               |                                                                        |                                                                               |                                                                                |                                                               |
| <i>a</i> (Å)                         | 90                                                            | 90                                                                     | 90                                                                            | 90                                                                             | 78.4470(10)                                                   |
| <i>β</i> (Å)                         | 90                                                            | 105.532(9)                                                             | 90.216(7)                                                                     | 107.667(5)                                                                     | 76.3600(10)                                                   |
| <i>γ</i> (Å)                         | 90                                                            | 90                                                                     | 90                                                                            | 90                                                                             | 89.9920(10)                                                   |
| <i>a</i>                             | 9.7339(16)                                                    | 13.596(4)                                                              | 5.1334(11)                                                                    | 13.566(3)                                                                      | 5.3560(2)                                                     |
| <i>b</i>                             | 12.884(2)                                                     | 5.0457(13)                                                             | 17.550(4)                                                                     | 5.0135(9)                                                                      | 10.9666(4)                                                    |
| <i>c</i>                             | 20.882(4)                                                     | 13.851(4)                                                              | 20.516(4)                                                                     | 13.582(2)                                                                      | 11.0710(4)                                                    |
| Volume                               | 2618.7(7)                                                     | 915.5(4)                                                               | 1848.4(6)                                                                     | 880.2(3)                                                                       | 618.38(4)                                                     |
| <i>Z</i>                             | 4                                                             | 18                                                                     | 2                                                                             | 1                                                                              | 1                                                             |
| Density (calculated)                 | 1.158                                                         | 1.381                                                                  | 1.518                                                                         | 1.370                                                                          | 1.328                                                         |
| F(000)                               | 984.0                                                         | 399.0                                                                  | 860.0                                                                         | 381.0                                                                          | 262.0                                                         |
| Goodness-of-fit on<br>F <sup>2</sup> | 1.066                                                         | 1.045                                                                  | 1.031                                                                         | 1.033                                                                          | 1.042                                                         |

|                                     |                                    |                                    |                                    |                                    |                                    |
|-------------------------------------|------------------------------------|------------------------------------|------------------------------------|------------------------------------|------------------------------------|
| Final R indices<br>$I > 2\sigma(I)$ | $R_1 = 0.0414,$<br>$wR_2 = 0.0984$ | $R_1 = 0.0482,$<br>$wR_2 = 0.1124$ | $R_1 = 0.0515,$<br>$wR_2 = 0.0943$ | $R_1 = 0.0642, wR_2 =$<br>$0.1423$ | $R_1 = 0.0394,$<br>$wR_2 = 0.0932$ |
| R indices (all data)                | $R_1 = 0.0503,$<br>$wR_2 = 0.1051$ | $R_1 = 0.0651,$<br>$wR_2 = 0.1223$ | $R_1 = 0.0766,$<br>$wR_2 = 0.1030$ | $R_1 = 0.1146, wR_2 =$<br>$0.1727$ | $R_1 = 0.0442,$<br>$wR_2 = 0.0962$ |

**Table S2** Crystal data and refinement parameters of complex **Cu(L3)<sub>2</sub>**

|                                   |                                                                                   |
|-----------------------------------|-----------------------------------------------------------------------------------|
| <b>CCDC</b>                       | <b>2251969</b>                                                                    |
| Identification code               | <b>Cu(L3)<sub>2</sub></b>                                                         |
| Chemical formula                  | C <sub>22</sub> H <sub>18</sub> ClCu <sub>0.5</sub> N <sub>2</sub> O <sub>2</sub> |
| Formula weight                    | 409.60                                                                            |
| Temperature                       | 100                                                                               |
| Wavelength                        | 0.71073                                                                           |
| Crystal size                      | 0.13 × 0.12 × 0.1                                                                 |
| Crystal system                    | monoclinic                                                                        |
| Space group                       | P2 <sub>1</sub> 2 <sub>1</sub> 2 <sub>1</sub>                                     |
| Unit cell dimensions              |                                                                                   |
| <i>a</i> (Å)                      | 90                                                                                |
| <i>b</i> (Å)                      | 100.864(3)                                                                        |
| <i>c</i> (Å)                      | 90                                                                                |
| <i>a</i>                          | 13.9547(13)                                                                       |
| <i>b</i>                          | 16.5604(16)                                                                       |
| <i>c</i>                          | 16.4837(15)                                                                       |
| Volume                            | 3741.0(6)                                                                         |
| Z                                 | 8                                                                                 |
| Density (calculated)              | 1.454                                                                             |
| F(000)                            | 1692.0                                                                            |
| Goodness-of-fit on F <sup>2</sup> | 1.038                                                                             |
| Final R indices $I > 2\sigma(I)$  | $R_1 = 0.0391, wR_2 = 0.0813$                                                     |
| R indices (all data)              | $R_1 = 0.0500, wR_2 = 0.0856$                                                     |

**Table S3** Selected bond distances (Å) and bond angles (°) for HL2-HL5 and HL8

|                  | <b>HL2</b> | <b>HL3</b> | <b>HL4</b> | <b>HL5</b> | <b>HL8</b> |
|------------------|------------|------------|------------|------------|------------|
| Bond distance(Å) |            |            |            |            |            |
| C1-O1            | 1.357(2)   | 1.338(4)   | 1.367(7)   | 1.352 (6)  | 1.342 (3)  |
| C7-N1            | 1.285(3)   | 1.277(4)   | 1.273(8)   | 1.277 (6)  | 1.328 (3)  |
| C14-O2           | 1.236(2)   | 1.232(4)   | 1.243(7)   | 1.240 (5)  | 1.238 (3)  |
| C14-N2           | 1.332(3)   | 1.339(4)   | 1.334(7)   | 1.329 (6)  | 1.340 (3)  |
| Bond angle (°)   |            |            |            |            |            |
| O1-C1-C2         | 120.25(18) | 118.4(3)   | 117.9(6)   | 117.8(4)   | 122.2(2)   |
| C7-N1-C8         | 116.92(17) | 122.2(3)   | 123.1(6)   | 121.3(4)   | 125.1(2)   |
| O2-C14-C13       | 119.31(18) | 121.6(3)   | 121.1(5)   | 121.6(4)   | 120.8(2)   |
| O2-C14-N2        | 123.97(19) | 123.0(3)   | 123.4(6)   | 122.3(4)   | 123.3(2)   |

**Table S4** Selected bond distances (Å) and bond angles (°) for Cu(L3)<sub>2</sub>

| <b>Cu(L3)<sub>2</sub></b> |           |
|---------------------------|-----------|
| Bond distance(Å)          |           |
| Cu1-O1                    | 1.925(3)  |
| Cu1-N1                    | 1.974(3)  |
| Cu1-O3                    | 1.933(3)  |
| Cu1-N3                    | 1.986(3)  |
| Cu1-O4                    | 2.354(3)  |
| Bond angle (°)            |           |
| O1-Cu1-N1                 | 92.31(13) |
| O1- Cu1-N3                | 89.61(13) |

|           |            |
|-----------|------------|
| O1-Cu1-03 | 151.85(12) |
| O1-Cu1-04 | 98.81(12)  |
| O1-Cu1-03 | 88.28(13)  |
| N1-Cu1-N3 | 176.75(14) |
| N1-Cu1-04 | 99.41(11)  |
| N3-Cu1-03 | 91.27(13)  |
| N3-Cu1-04 | 77.69(11)  |
| O3-Cu1-04 | 108.86(12) |

**Stability profile of  $\text{Cu(L1)}_2 - \text{Cu(L8)}_2$  by UV-visible spectroscopic characterization:** The stability of  $\text{Cu(L1)}_2 - \text{Cu(L8)}_2$  (Fig. S22, ESI†) under simulated physiological conditions (phosphate buffer saline (PBS) solution at pH 7.4 containing 1% DMSO) showed no obvious bathochromic and hypsochromic shift at 0, 1, and 2 h.

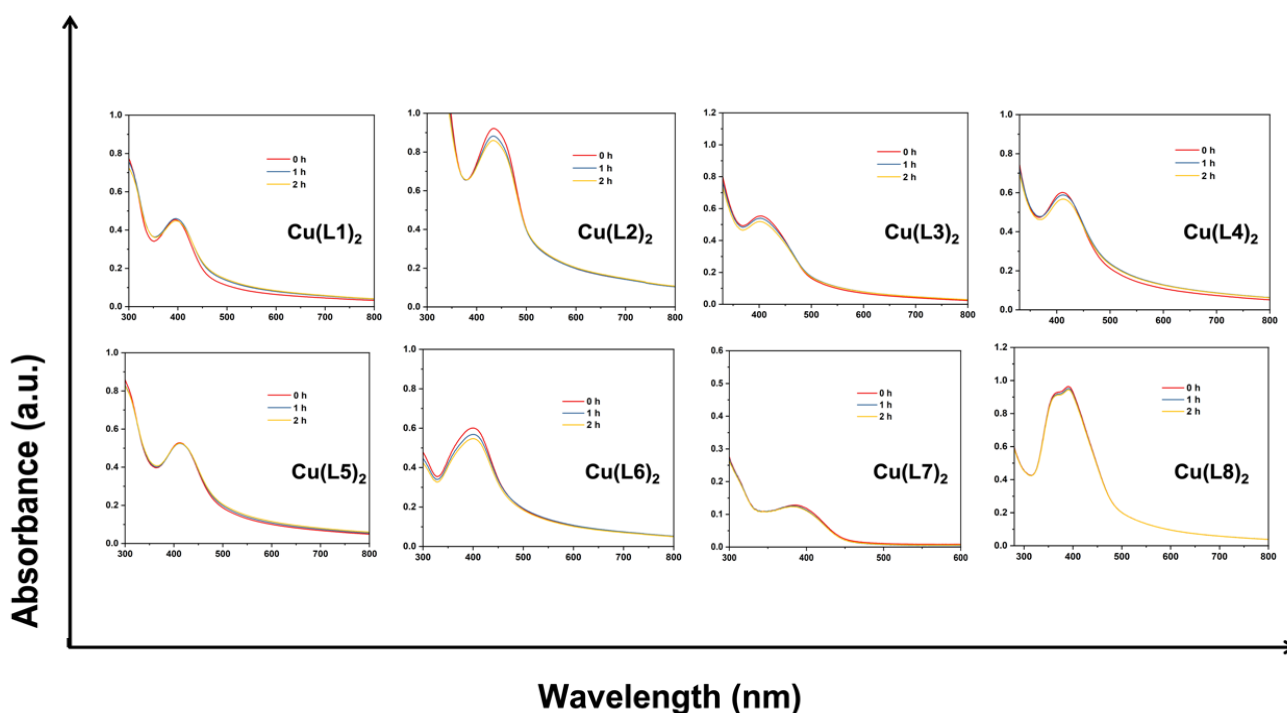

**Figure S22: Stability profile:** UV-Visible absorption spectra of complexes  $\text{Cu(L1)}_2 - \text{Cu(L8)}_2$  in PBS buffer containing 1% DMSO solution at time = 0 h, 1 h and 2 h.

**Electrochemical profile of Cu(L2)<sub>2</sub>:** Cyclic Voltammetry (CV) analysis was performed on a CHI610E electrochemical analyzer under oxygen-free conditions. The CV studies were performed on the copper complex ( $10^{-3}$  M) using 0.1 M [nBu<sub>4</sub>N] [ClO<sub>4</sub>] as a supporting electrolyte in DMF solvent at a scan rate of 50 mV/s. The three-component electrode consisted of a glassy carbon working electrode, a Ag/AgCl reference electrode, and a platinum wire as the counter electrode. The CV plot of Cu(II) complex showed one quasi-reversible peak at  $E_{1/2} = 0.53$  V vs. Ag/AgCl ( $E_{p/a} = 0.49$  V,  $E_{p/c} = 0.57$  V vs. Ag/AgCl) corresponding to the Cu<sup>II</sup>/Cu<sup>I</sup> redox couple. [1] Scan rates effect on the electrochemical behaviour of the CuL<sup>11</sup> was investigated in the potential range of 0.0 to 1.2 V in 0.1 M [nBu<sub>4</sub>N] [ClO<sub>4</sub>]. A linear correlation exists between the peak current and the square root of the scan rate. However, the voltammetric data shows that at higher scan rates, the reduction ( $E_{p/c}$ ) and oxidation ( $E_{p/a}$ ) peaks are shifted to more negative and positive values, respectively. Therefore, the process can be considered to be quasi-reversible.

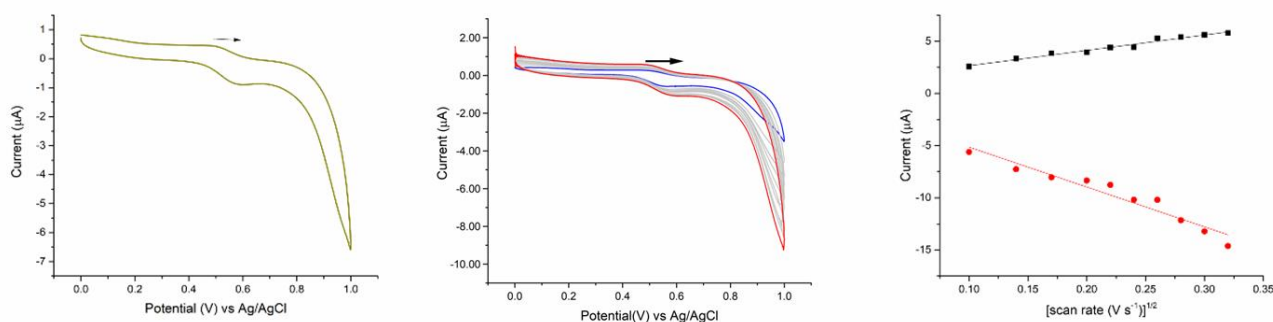

**Figure S23** Electrochemical characterization of Cu(L2)<sub>2</sub> (Left): Cyclic voltammogram at a glassy carbon electrode in DMF with [nBu<sub>4</sub>N] [ClO<sub>4</sub>] as a supporting electrolyte. (Centre): Data collected at different scan rate 0.01-0.1 V/s using an Ag/AgCl reference electrode and a platinum wire electrode. (Right): Plot of measured anodic peak current vs square root of applied scan rate for both the reduction (circle) and oxidation (square) events on the cyclic voltammogram.

## Biological Profile

**Cell lines and culture conditions.** Breast adenocarcinoma cell lines MDA-MB-231 and MCF-7, Human lung adenocarcinoma cell line A549, Human colon cancer cell line HCT-116, and Human embryonic kidney cell line HEK-293 was obtained from National Centre for Cell Science (NCCS Pune, India). The cell lines were maintained in RPMI 1640 (MDA-MB-231, MCF-7 and A549) or DMEM medium (HCT-116, HEK-293), supplemented with 10% fetal bovine serum, 10,000 Units/mL penicillin and 10,000 µg/mL streptomycin, at 37 °C humidified atmosphere with 5% CO<sub>2</sub>. All stocks of the compound were prepared in DMSO.

**Resazurin assay.** The cytotoxicity of the compounds was determined by the resazurin assay. For each cell type 0.35×10<sup>6</sup> cells were plated in culture flasks, The cells were harvested from culture flasks by trypsinization and 2,500 cells per well were seeded into 96-well microculture plates for the viability assay. After the cells were allowed to resume exponential growth for 24 h, they were exposed to drugs at different concentrations in media for 72 h. Cisplatin (10 µM) and DMSO (0.5-0.2% of the media) were used as positive and negative control, respectively. After the exposure of 72 h, the cells were washed once with 1xPBS (100 µL/well) and then treated with resazurin solution (150 µL/well, 0.02 mg/mL) for 4 h in the dark and then fluorescence was taken at emission wavelength range 580-640 nm ( $\lambda_{\text{ex}} = 520 \text{ nm}$ ) by SpectraMax M5<sup>e</sup> microplate reader. All procedures were carried out in triplicate of three independent experiments. IC<sub>50</sub> values were calculated using GraphPad Prism 8.0 software and the results were presented as a mean ± SD.

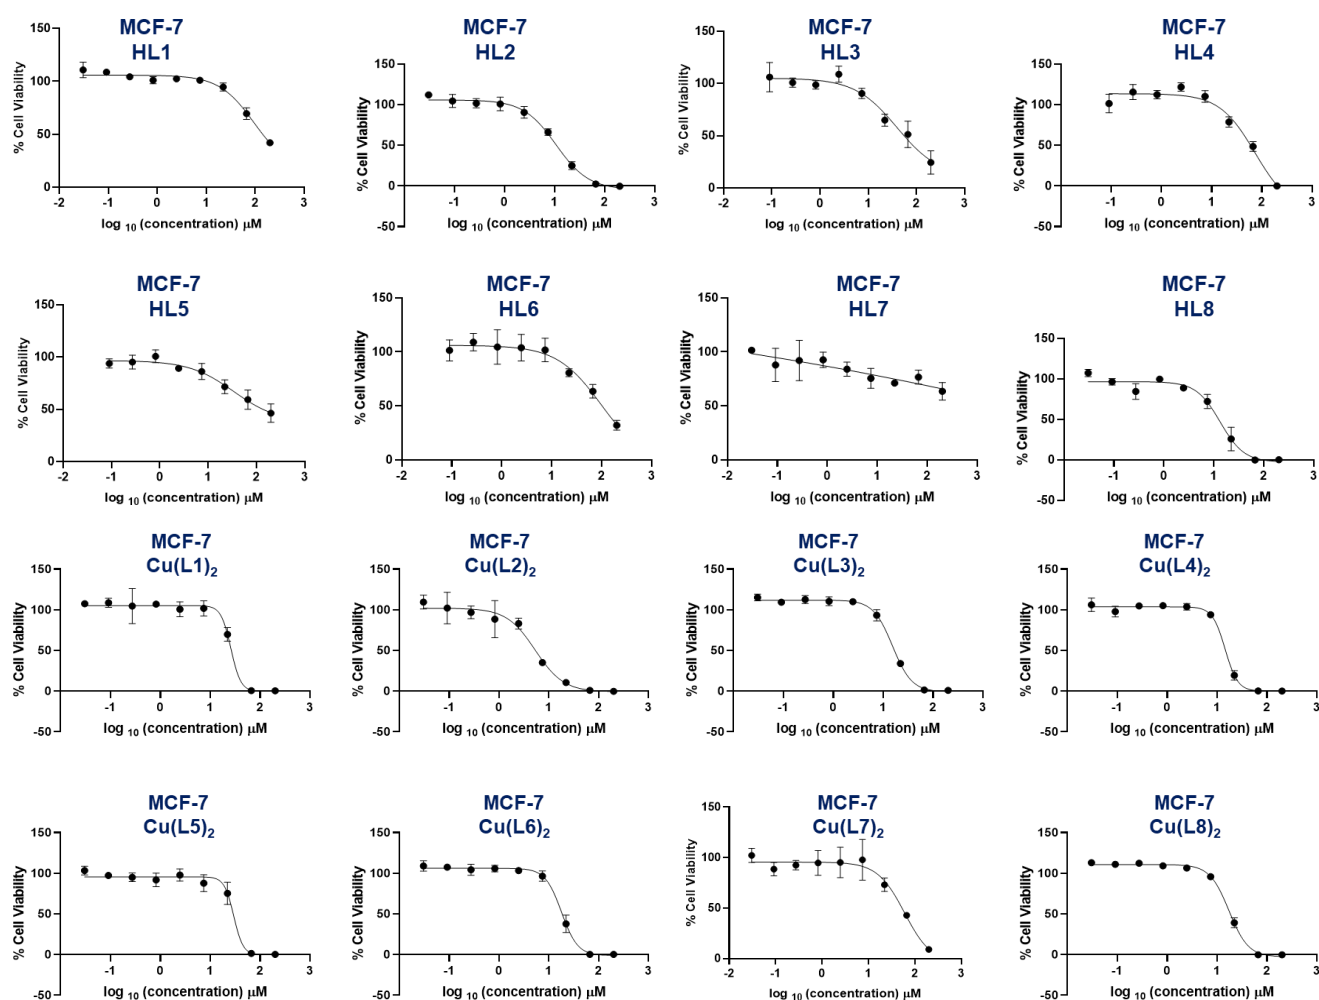

Figure. S24: Cytotoxicity profile of HL1 - HL8 and Cu(L1)<sub>2</sub> - Cu(L8)<sub>2</sub> in MCF-7 cell lines by Resazurin Assay

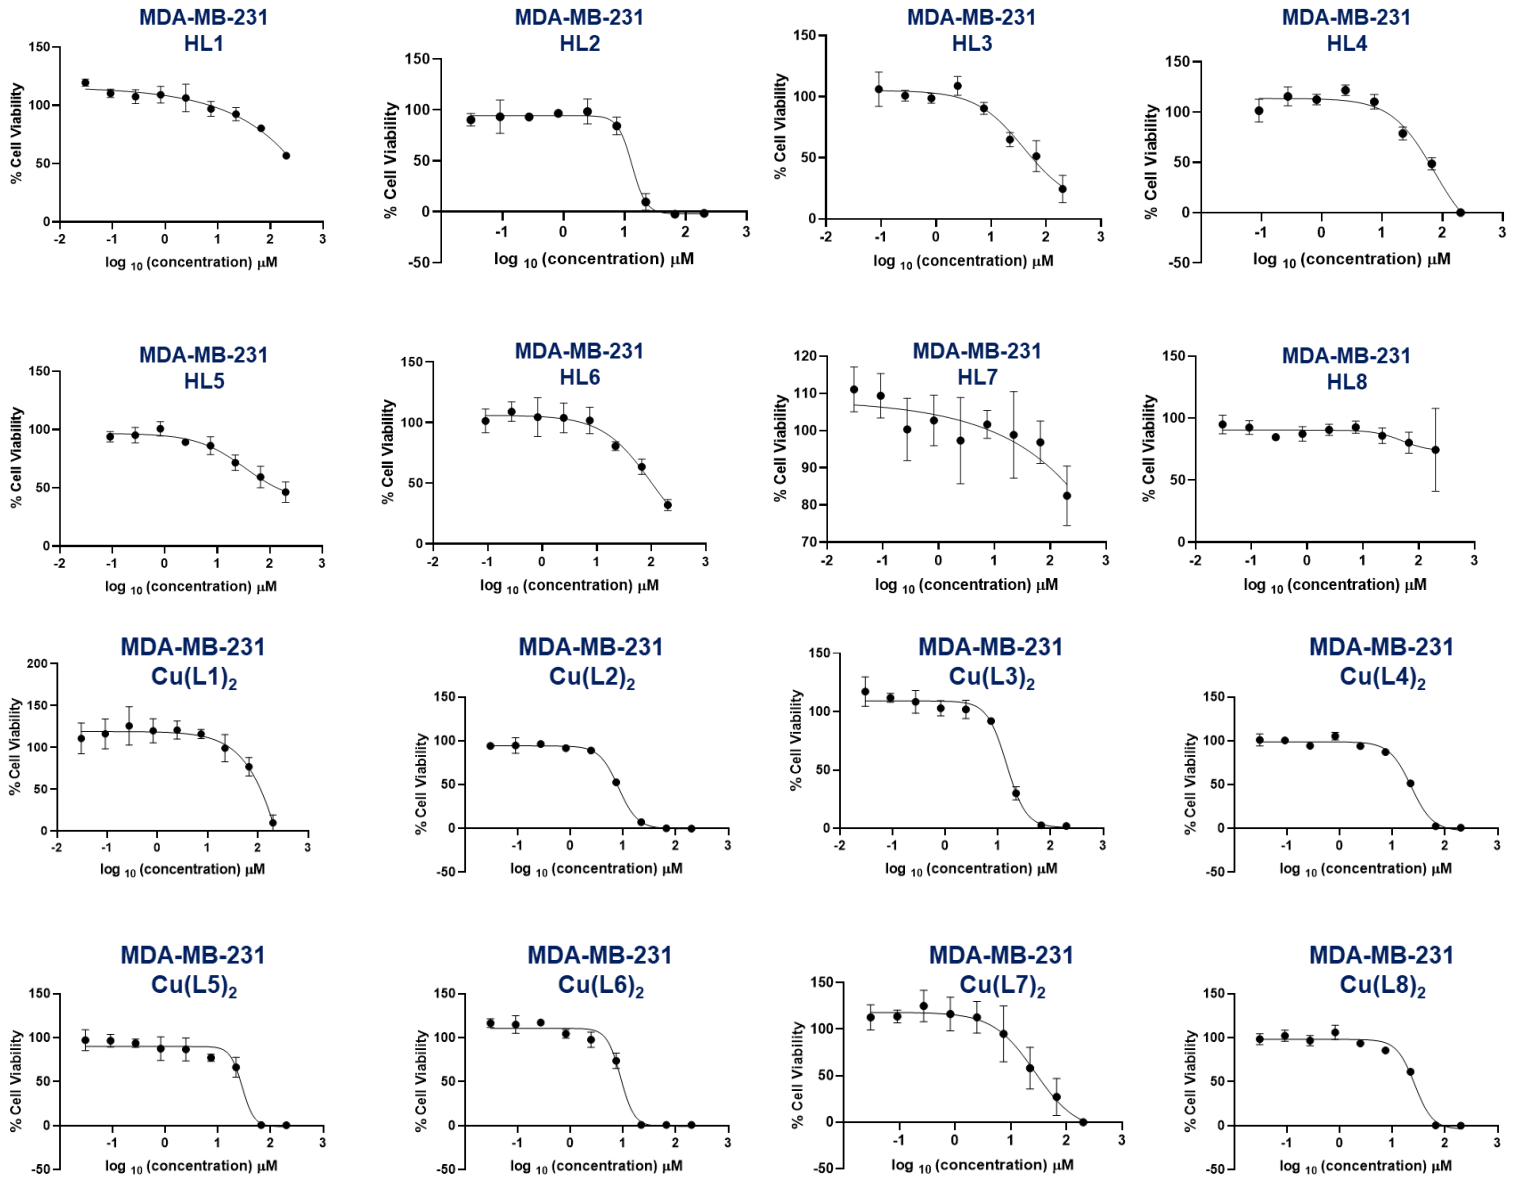

Figure. S25: Cytotoxicity profile of HL1 - HL8 and Cu(L1)<sub>2</sub> - Cu(L8)<sub>2</sub> in MDA-MB-231 cell lines by Resazurin Assay

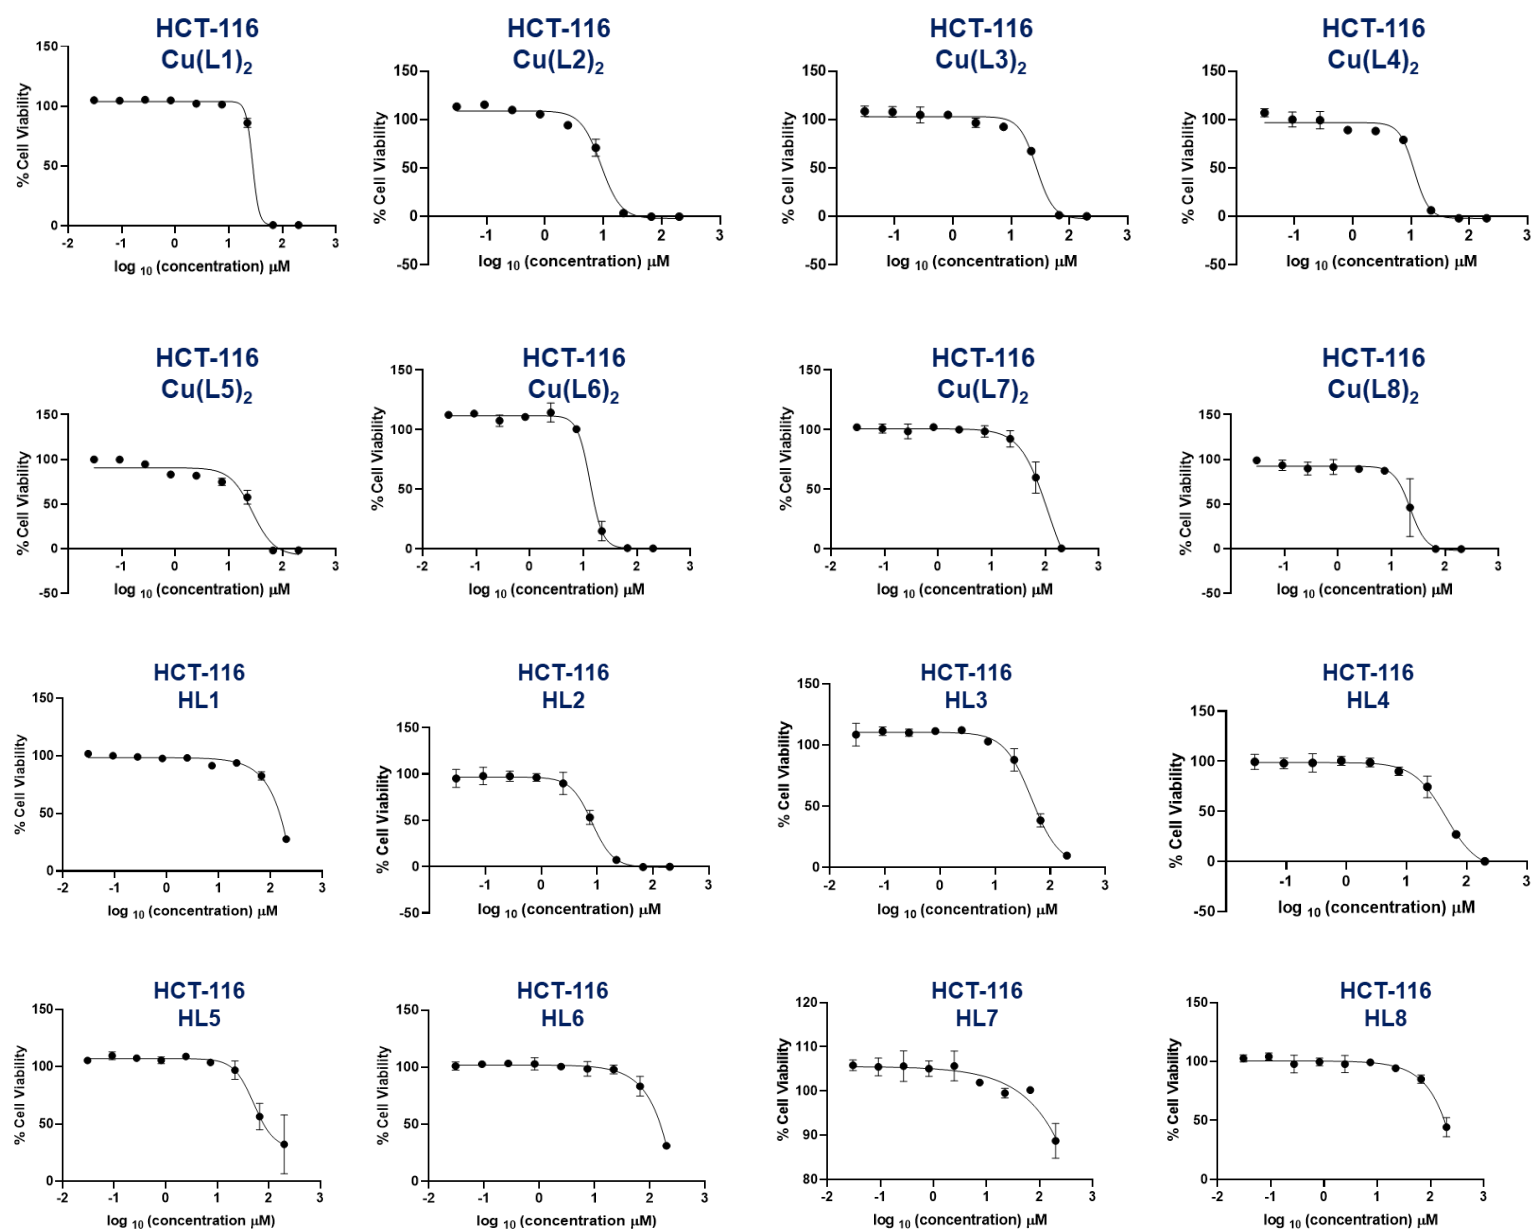

Figure. S26: Cytotoxicity profile of HL1- HL8 and Cu(L1)<sub>2</sub> - Cu(L8)<sub>2</sub> in HCT-116 cell lines by Resazurin

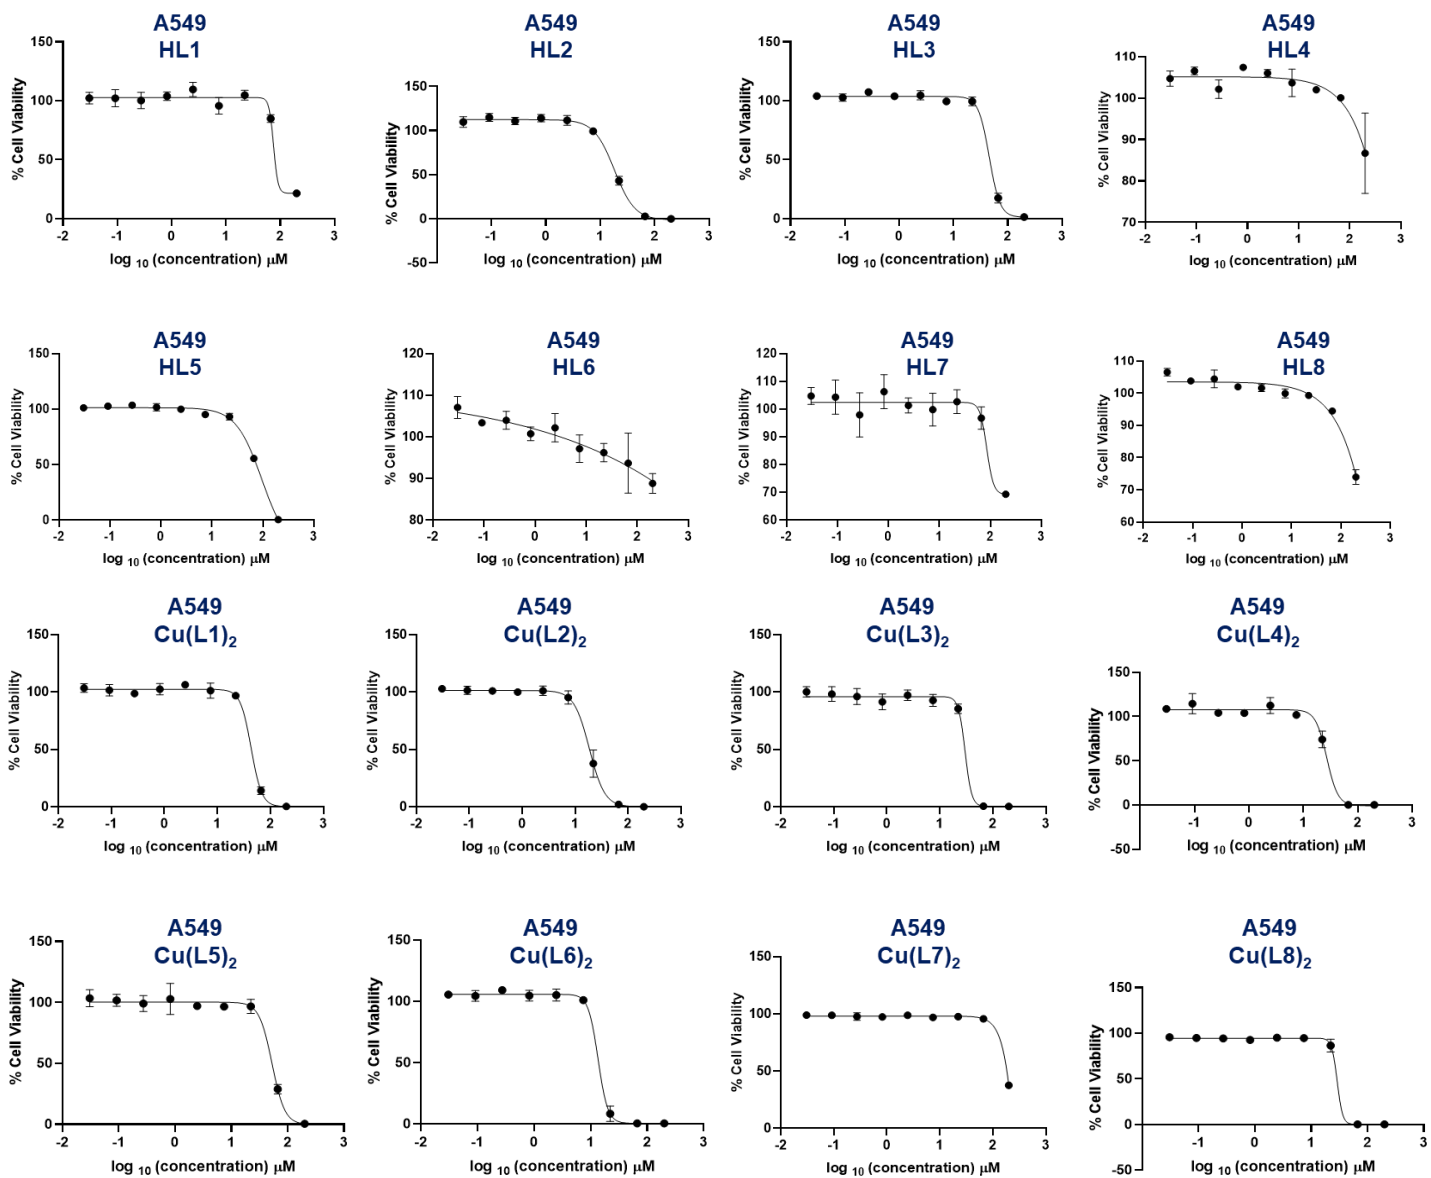

Figure. S27: Cytotoxicity profile of HL1 – HL8 and Cu(L1)<sub>2</sub> – Cu(L8)<sub>2</sub> in A549 cell lines by Resazurin



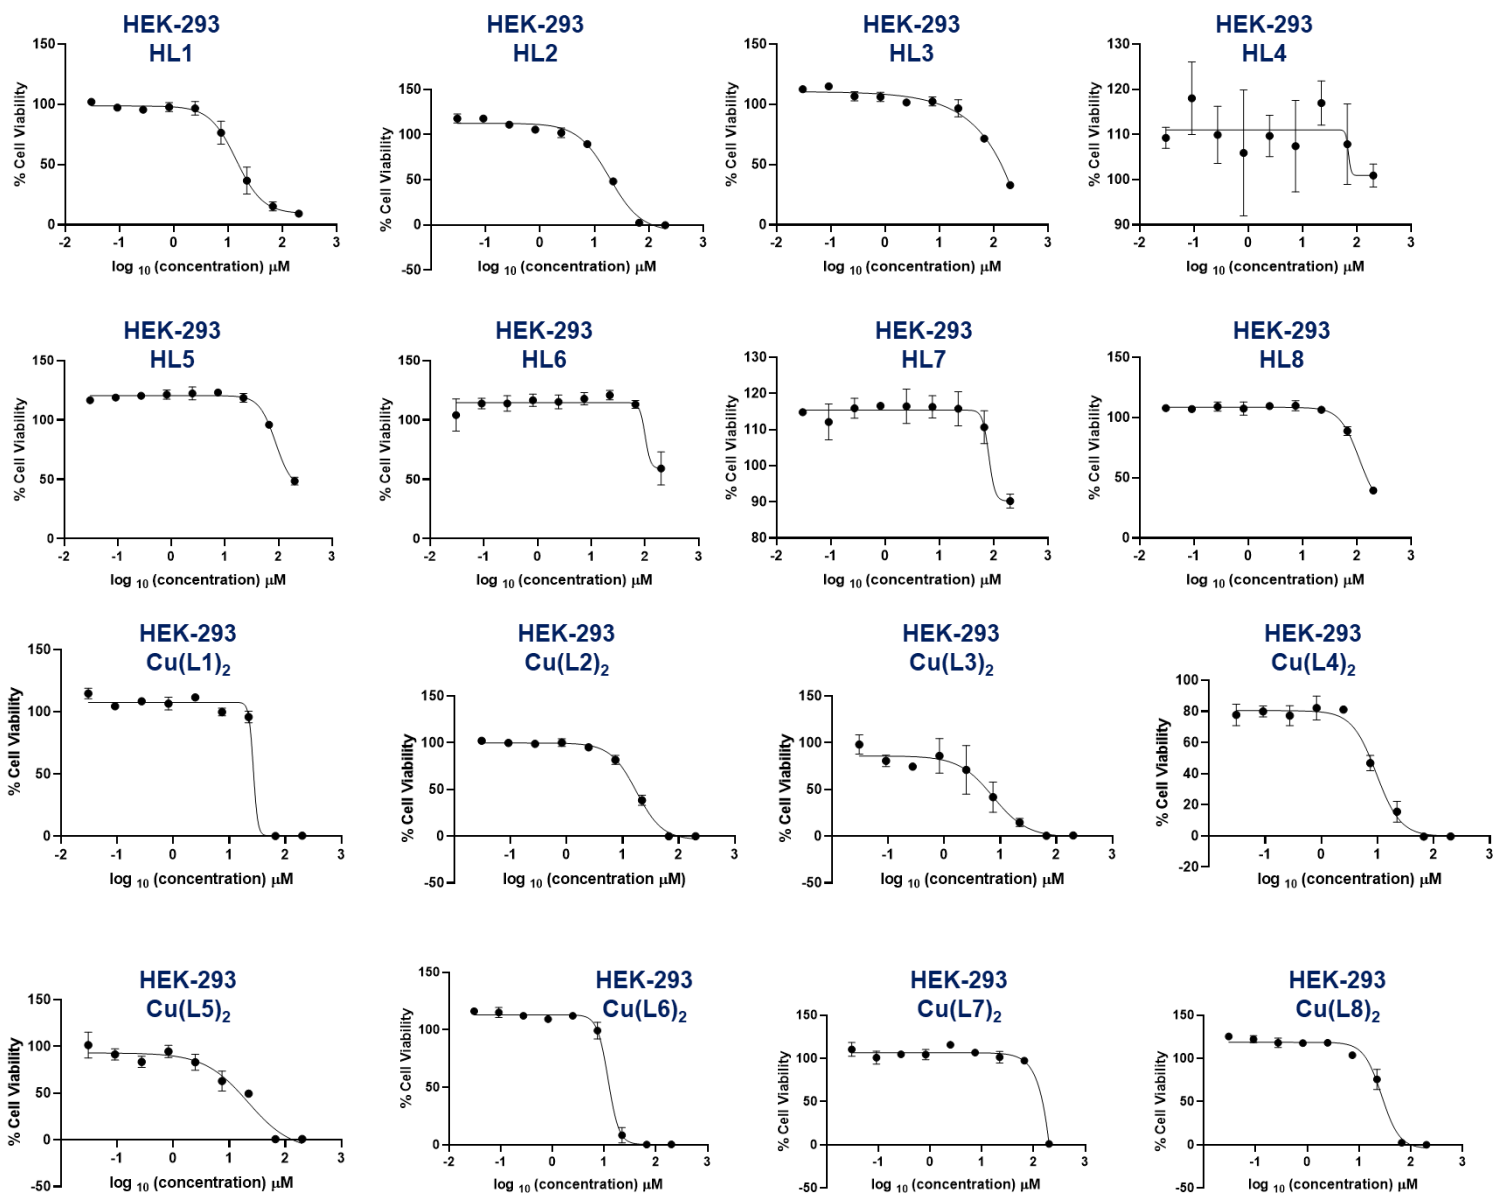

Figure. S28: Cytotoxicity profile of HL1 – HL8 and Cu(L1)<sub>2</sub> – Cu(L8)<sub>2</sub> in HEK-293 cell lines by Resazurin Assay

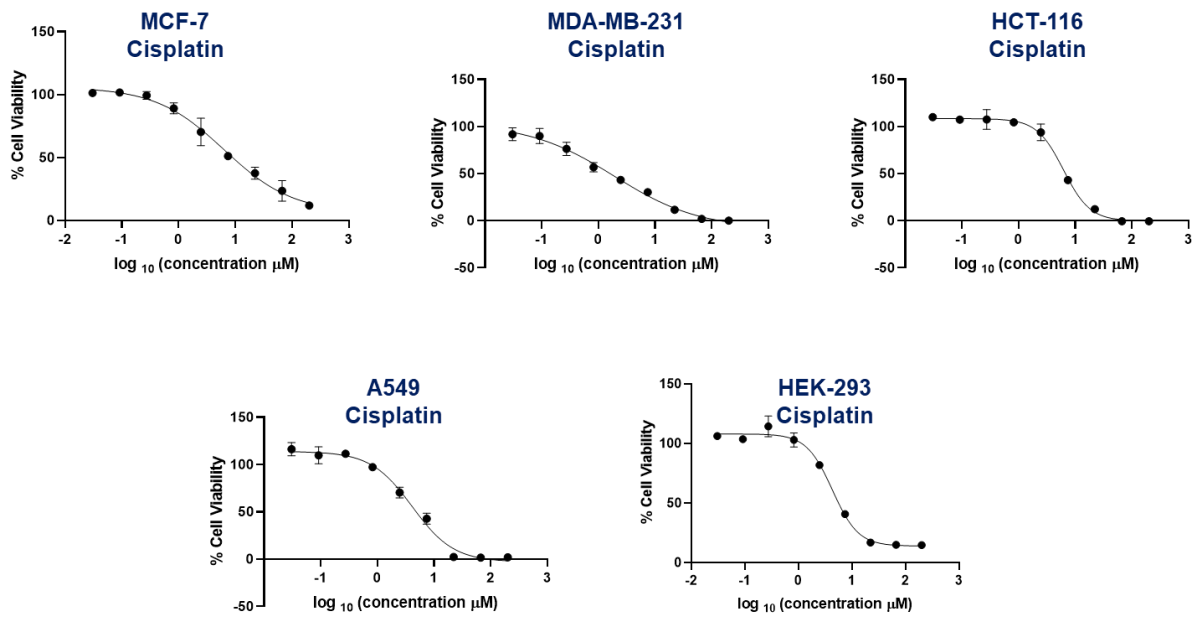

Figure. S29: Cytotoxicity profile of FDA approved cisplatin in 5 cell lines (A549, HCT-116, HEK-293, MCF-7, MDA-MB-231) by Resazurin Assay

**Live/Dead assay.** To investigate cytotoxicity of **Cu(L2)<sub>2</sub>** Live/Dead assay was performed. Cytotoxicity was detected by calcein-AM and propidium iodide (PI) dual-color fluorescence staining. In brief,  $1 \times 10^6$  cells/well of MCF-7 were seeded in a 6 well plate and cultured overnight. The cells were treated with **Cu(L2)<sub>2</sub>** at different concentrations for 48 h. Untreated cells and cisplatin (20  $\mu$ M) were used as negative and positive control, respectively. Then the medium was aspirated and washed three times with PBS. The cells were incubated with Calcein-AM/PI in working buffer for 30 min. The staining medium was aspirated, washed with PBS and the cells were observed by fluorescent cell imager.

**Benzoate Hydroxylation Assay.** Stock solutions of ligands were prepared in methanol and EDTA in ultrapure water. Ligand stock solutions were added to the test solutions prepared in 10 mM phosphate buffer (pH 7.40) and it also contains benzoate. The amount of methanol (0.46% v/v) was maintained the same in all test solutions. Following addition of  $\text{FeSO}_4$ , the hydroxylation reaction was initiated by addition of 30%  $\text{H}_2\text{O}_2$ . The final volume of each test solution was 3000  $\mu$ L, containing 1.0 mM benzoate, 30  $\mu$ M Fe(II), 1 mM  $\text{H}_2\text{O}_2$ , and varying concentrations of ligands. Test solutions were incubated for 3.5 h at room temperature, and then fluorescence emission was collected at 410 nm (ex. 290 nm). Measurements were conducted in triplicate and reported as average  $\pm$  standard deviation.

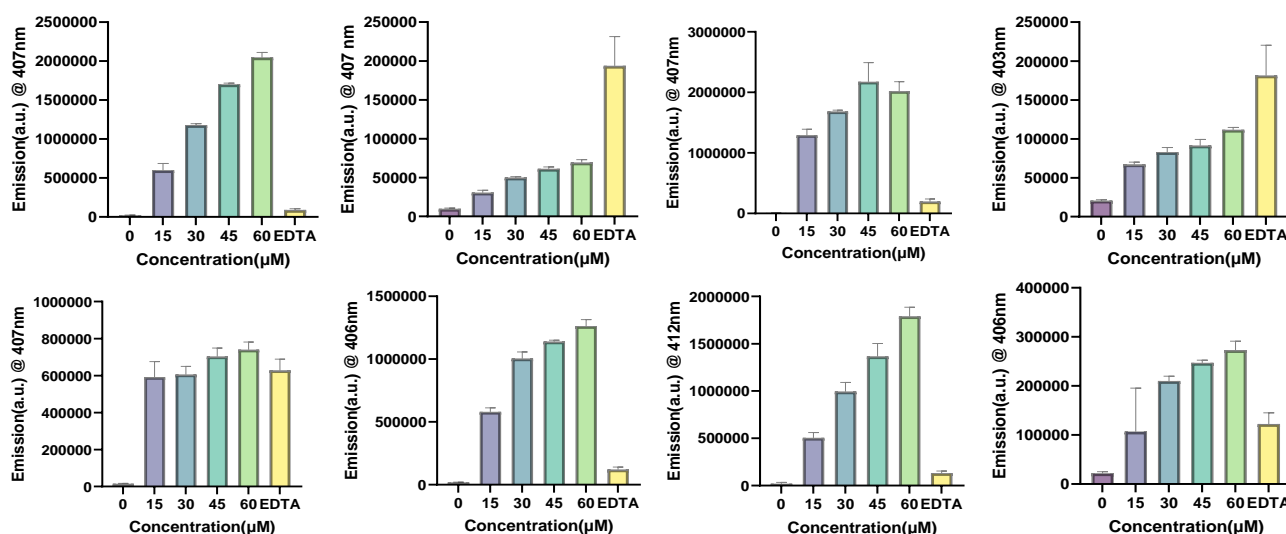

**Figure. S30:** Effect of synthesised ligands (HL1-HL8) on the rate of benzoate hydroxylation that results the formation of fluorescent salicylate(s) (ex. 290 nm, em. 400-410 nm) in the presence of Fe(II) ions (30  $\mu$ M) and  $\text{H}_2\text{O}_2$  (1.0 mM). All the solutions had been prepared in phosphate buffer (10 mM, pH 7.40), and after adding  $\text{H}_2\text{O}_2$ , they were all incubated for 3 hours. As a positive control, 30  $\mu$ M of EDTA was used.

**Methylene Blue degradation assay.** A fixed concentration of Methylene Blue (MB) solution was prepared in 1x PBS buffer solution (pH 7.4) with 8 mM  $\text{H}_2\text{O}_2$ , 100 mM GSH, and 128  $\mu$ M **Cu(L2)<sub>2</sub>** complex. After the mixing system had been incubated for 30 min at room temperature, the absorbance of MB was determined using UV-vis spectroscopy.

**Detection of  $\cdot\text{OH}$  by EPR.** Equal molar **Cu(L2)<sub>2</sub>** complex (50  $\mu$ M) and GSH (50  $\mu$ M) were dissolved in DMF and distilled water, respectively. Subsequently, they were mixed and reacted. After 5 min,  $\text{H}_2\text{O}_2$  (8 mM) and DMPO (100 mM) were added. The spectra of  $\cdot\text{OH}$  signals were recorded on a Bruker EMX (X-band) Spectrometer.

**Measurement of intracellular reactive oxygen species (ROS).** MCF-7 cells ( $2.5 \times 10^4$  cells/well) were plated in 96 well plate and allowed to adhere overnight. Afterwards, the cells were treated with Cu-complex **Cu(L2)<sub>2</sub>** as well as metal free ligand **HL2**. Hydrogen peroxide ( $\text{H}_2\text{O}_2$ ) was used as positive control whereas DMSO treated cells were used as a negative control in this experiment. After 3 h of incubation, the media containing compounds was removed and the cells were washed with PBS. Then, a solution of 2',7'-dichlorodihydrofluorescein diacetate ( $\text{H}_2\text{DCF-DA}$ ; 10  $\mu$ M, 100  $\mu$ L) in PBS was added to the cells and incubated in the dark at 37  $^\circ\text{C}$  for 15 min. The cells were then washed thrice with PBS to remove excess  $\text{H}_2\text{DCF-DA}$  and fluorescence microscopy images were captured immediately using BIO-RAD ZOE<sup>TM</sup> fluorescent cell imager.

**Copper complex interaction with GSH by NMR.** GSH and the Cu(II) complex **Cu(L2)<sub>2</sub>** were both dissolved in  $\text{D}_2\text{O}$  and 60:1(v/v)  $\text{DMSO-d}_6$ , respectively. The complex's disassociated ligand was observed by  $^1\text{H}$  NMR spectra after a 2-hour mixing period. Additionally, 1:5 (v/v)  $\text{DMSO-d}_6$  and  $\text{D}_2\text{O}$  were used to dissolve the copper (II) complex and GSH, in order to identify the GSSG (oxidation product of GSH) using  $^1\text{H}$  NMR spectra.

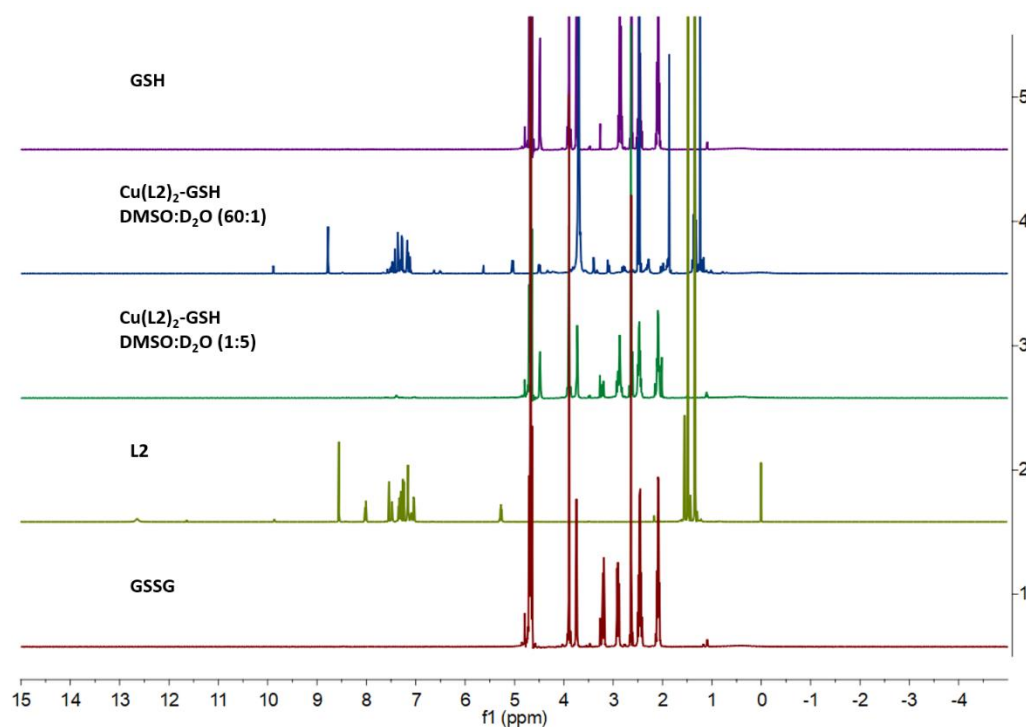

**Figure S31:**  $^1\text{H}$  NMR spectra of (a) reduced glutathione (GSH); (b) GSH with  $\text{Cu}(\text{L2})_2$  in  $\text{DMSO}:\text{D}_2\text{O}$  (60:1); (c) GSH with  $\text{Cu}(\text{L2})_2$  in  $\text{DMSO}:\text{D}_2\text{O}$  (1:5); (d) HL2; and (e) oxidized glutathione (GSSG).

**Glutathione depletion by Ellman's reagent.** Glutathione (GSH) depletion was investigated using Ellman's reagent in cell-free as well as in-cell environment. At first, solutions with 20 mM GSH and 40  $\mu\text{M}$  of  $\text{Cu}(\text{L2})_2$  complex were incubated at 37  $^\circ\text{C}$  for 0–6 h. Then the samples were centrifuged at 12000 rpm for 10 min, and the supernatants were collected. A DTNB solution was added to the supernatant and co-incubated for 5 min at 25  $^\circ\text{C}$ , and then the absorbance at 412 nm was measured with a microplate reader. The same procedure was followed with a higher concentration of  $\text{Cu}(\text{L2})_2$  (400  $\mu\text{M}$ ).

Afterwards, the depletion in GSH level was estimated in MCF-7. In brief,  $1 \times 10^6$  cells were plated in 6-well plate and incubated for 24 h. After that, cells were treated with different concentrations of  $\text{Cu}(\text{L2})_2$  and kept for incubation. After 24 h, cells were collected by centrifugation, and the cellular protein was precipitated by incubating 250  $\mu\text{L}$  of the sonicated cell suspension with 250  $\mu\text{L}$  TCA (10%) and was placed on ice for 1 h and then by centrifugation for 10 min at 3000 rpm. The supernatant was added to 500  $\mu\text{L}$  of 0.4 M Tris buffer (pH 8.9) containing 0.02 M EDTA, followed by the addition of 0.01 M 5,5'-dithionitrobenzoic acid (DTNB) to a final volume of 1.5 ml. At 37  $^\circ\text{C}$ , for 10 min of incubation in a shaking water bath, the tubes were kept. The absorbance was recorded at 412 nm.

**GSH-Glo™ Glutathione Assay for.** The GSH-Glo™ Glutathione Assay is a luminescence-based assay for detecting and quantifying glutathione (GSH). The experiment was performed according to the assay protocol. In the 96-well plate, 2500 cells of MCF-7 were seeded and allowed to adhere overnight. The cells were treated with five different concentrations of  $\text{Cu}(\text{L2})_2$  and incubated for 24 h. Afterwards, media was removed and cells of each well were treated with 100  $\mu\text{L}$  of prepared 1X GSH-Glo™ Reagent and incubated for 30 minutes at room temperature. Furthermore, 100  $\mu\text{L}$  of reconstituted Luciferin Detection Reagent was added to each well and incubated for 15 minutes again and then recorded the luminescence using plate reader.

**ICP-MS.** MCF-7 cells were plated in 6-well plate ( $1 \times 10^6$  cells/well). After incubation for 24 h, the medium was replaced by medium containing copper complex  $\text{Cu}(\text{L2})_2$  and  $\text{Cu}(\text{OAc})_2 \cdot \text{H}_2\text{O}$ . After 8 h, the medium was aspirated. Cells were trypsinized, counted and washed three times with PBS. Then, cells were centrifuged at 3000 rpm at 4  $^\circ\text{C}$  for 10 min digested in  $\text{HNO}_3$  overnight. Each sample was diluted to 10 mL before test. The amount of Cu was determined by ICP-MS. Each result was repeated three times.

**Lipophilicity by ICP-MS.** The flask-shaking method and ICP-MS analysis were utilised to determine the lipophilicity ( $\log P_{o/w}$ ) of  $\text{Cu}(\text{L2})_2$ . An equivalent amount of 0.9% (w/v) NaCl solution, saturated with octanol, was introduced into a 1 mL stock solution of the  $\text{Cu}(\text{L2})_2$  in n-octanol. The resulting mixture was agitated for 24 hours in an incubator set at 37  $^\circ\text{C}$ . Following this, the mixtures underwent centrifugation at 10000 rpm for 10 minutes. Subsequently, the distinct oil and water phases were carefully isolated. A total of 100  $\mu\text{L}$  from each of the oil and water phases were subjected to dissolution using 65%  $\text{HNO}_3$  (300  $\mu\text{L}$ ) and subsequently diluted to a final volume of 10 mL using distilled water. The concentration of copper(II) ( $C_o$  or  $C_w$ ) was determined via the ICP-MS technique utilising an internal reference. The  $P_{o/w}$  value is directly proportional to the ratio of the concentration of the organic phase ( $C_o$ ) to the concentration of the aqueous phase ( $C_w$ ).

Table S5: Lipophilicity for Cu(L1)<sub>2</sub> - Cu(L8)<sub>2</sub>

| Compound            | Lipophilicity (P <sub>o/w</sub> ) | logP <sub>o/w</sub> |
|---------------------|-----------------------------------|---------------------|
| Cu(L1) <sub>2</sub> | 0.65                              | -0.18               |
| Cu(L2) <sub>2</sub> | 0.89                              | -0.050              |
| Cu(L3) <sub>2</sub> | 1.63                              | 0.21                |
| Cu(L4) <sub>2</sub> | 1.71                              | 0.23                |
| Cu(L5) <sub>2</sub> | 0.86                              | -0.065              |
| Cu(L6) <sub>2</sub> | 0.38                              | -0.42               |
| Cu(L7) <sub>2</sub> | 0.074                             | -1.13               |
| Cu(L8) <sub>2</sub> | 1.36                              | 0.13                |

**DNA Binding:** In analyzing the UV-vis titration spectra with DNA, it was observed that increasing the concentration of DNA resulted in hypochromism, indicating an intercalation binding mode between Cu(L2)<sub>2</sub> and DNA base pairs. Additionally, an isosbestic point was observed at 380 nm (can be seen when 0.1 eq.- 1 eq. of DNA was added, as shown in fig.) suggests that equilibrium was established between DNA and Cu(L2)<sub>2</sub>. The intrinsic binding constant ( $K_b$ ) of Cu(L2)<sub>2</sub> with CT-DNA was determined by using the equation:  $[DNA]/(\epsilon_a - \epsilon_f) = [DNA]/(\epsilon_b - \epsilon_f) + 1/K_b(\epsilon_b - \epsilon_f)$ , where  $\epsilon_a$  is the extinction coefficient of the complex at a given DNA concentration,  $\epsilon_b$  is the extinction coefficient of complex when fully bound to DNA,  $\epsilon_f$  is the extinction coefficient of the complex in free solution. The plot  $[DNA]/(\epsilon_a - \epsilon_f)$  vs.  $[DNA]$  gave the slope  $1/(\epsilon_b - \epsilon_f)$  and intercept  $1/K_b(\epsilon_b - \epsilon_f)$ ,  $K_b$  was calculated as ratio of slope to intercept. The value of intrinsic binding constant was found to be  $K_b = 1.28 \times 10^5 \text{ M}^{-1}$ , which is consistent to the previous reported studies.<sup>7,8</sup>

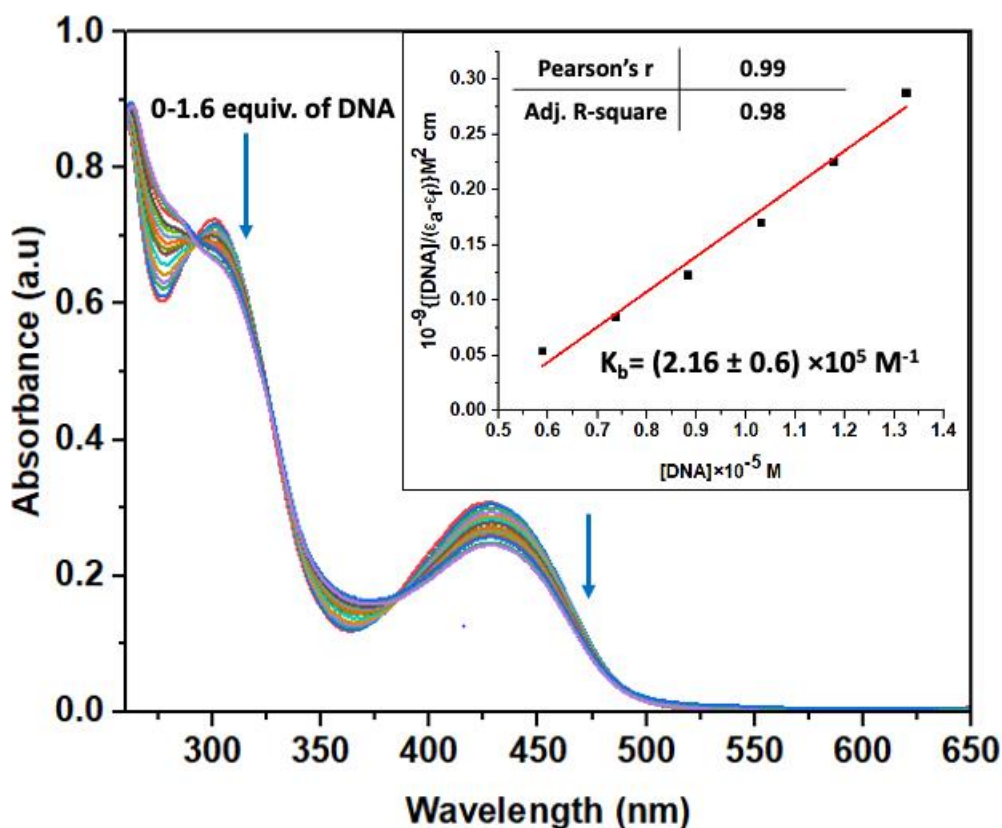

**Figure S32:** Absorption spectra of Cu(L2)<sub>2</sub> (50 μM) at pH 7 (50 mM Tris-buffer ) with increasing CT-DNA concentration (0.1 – 1.6 equivalent). (Inset) Linear Point for binding constant of Cu(L2)<sub>2</sub> (50 μM) with increasing CT-DNA (0.1 – 1.6 equivalent).

**TMRM assay.** MCF-7 cells (2.5 x 10<sup>4</sup> cells/well) were plated in 96 well plate and allowed to adhere overnight. Afterwards, the cells were treated with Cu-complex Cu(L2)<sub>2</sub> as well as metal free ligand HL2. Hydrogen peroxide (H<sub>2</sub>O<sub>2</sub>) was used as positive control whereas DMSO treated cells were used as a negative control in this experiment. After 3 h of incubation, the media containing compounds was removed and the cells were washed with PBS. Then, a solution of Tetramethyl rhodamine methyl ester perchlorate (TMRM; 10 nM, 100 μL) in RPMI-1640 media was added to the cells and incubated in the dark at 37 °C for 15 min. The cells were then washed thrice with PBS to remove excess TMRM and fluorescence microscopy images were captured immediately using BIO-RAD ZOE™ fluorescent cell imager.

**ATP assay.** ATP production was measured using the Cell Titer-Glo luminescence cell viability assay kit (Promega) according to the manufacturer’s instructions. MCF-7 cells were cultured in an opaque-walled 96-well plate and treated with Cu(L2)<sub>2</sub> at the indicated concentrations for 12 h. 100 μL Cell Titer-Glo reagent was added to each well. The plate was incubated at room temperature for 30 min. Luminescence intensity was measured in a microplate reader.

**Lipid peroxidation assay.** MCF-7 cells (1.5 x 10<sup>4</sup> cells/well) were plated in 96 well plate and allowed to adhere overnight. Afterwards, the cells were treated with Cu-complex Cu(L2)<sub>2</sub> with its 20-fold and 10-fold IC<sub>50</sub> values, respectively. DMSO treated cells were used as a negative control in this experiment. After 3 h of incubation, the media containing compounds was removed and the cells were washed with PBS. Then, a solution of C11-BODIPY in media was added to the cells and incubated in the dark at 37 °C for 15 min. The cells were then washed thrice with PBS to remove excess C11-BODIPY and fluorescence microscopy images were captured immediately using BIO-RAD ZOE™ fluorescent cell imager. Oxidation of BODIPY-C11 581/591 was calculated as the ratio of the green (fluorescence emission of the oxidized probe)/red fluorescence mean intensity (fluorescence emission of reduced probe) within the cell outlines.

**Hemolytic assay.** To check the induction of hemolysis, fresh human blood has been used in this experiment.<sup>4</sup> Briefly, The blood was collected and centrifuged at 1500 rpm for 10 min to remove blood plasma. The pellet of red blood cells (RBCs) were then washed thrice in PBS. Afterwards, RBCs were resuspended in 4% v/v in the PBS buffer. Compound Cu(L2)<sub>2</sub> and the corresponding ligand HL2 were dissolved in DMSO and serially diluted. In the 96 well plate, 20 μL of each concentration were added to the 100 μL of RBC suspension in each well and volume of 200 μL was achieved by adding PBS. The plate was immediately kept for the incubation of 1 h. After incubation, the plates were centrifuged again at 1500 rpm for 10 min. the supernatant (20 μL) was added to 80 μL of PBS in a fresh 96-well plate and hemoglobin release was measured. The optical density (OD) at 414 nm was measured for the hemoglobin release by using SpectraMax M5<sup>e</sup> microplate reader. For positive control, 0.1% Triton X-100 was used whereas untreated cells were used as negative control. Percentage hemolysis was calculated using formula –

$$\% \text{ hemolysis} = \frac{[(\text{OD of Sample} - \text{OD of PBS}) / (\text{OD of Triton X} - \text{OD of PBS})] \times 100}$$

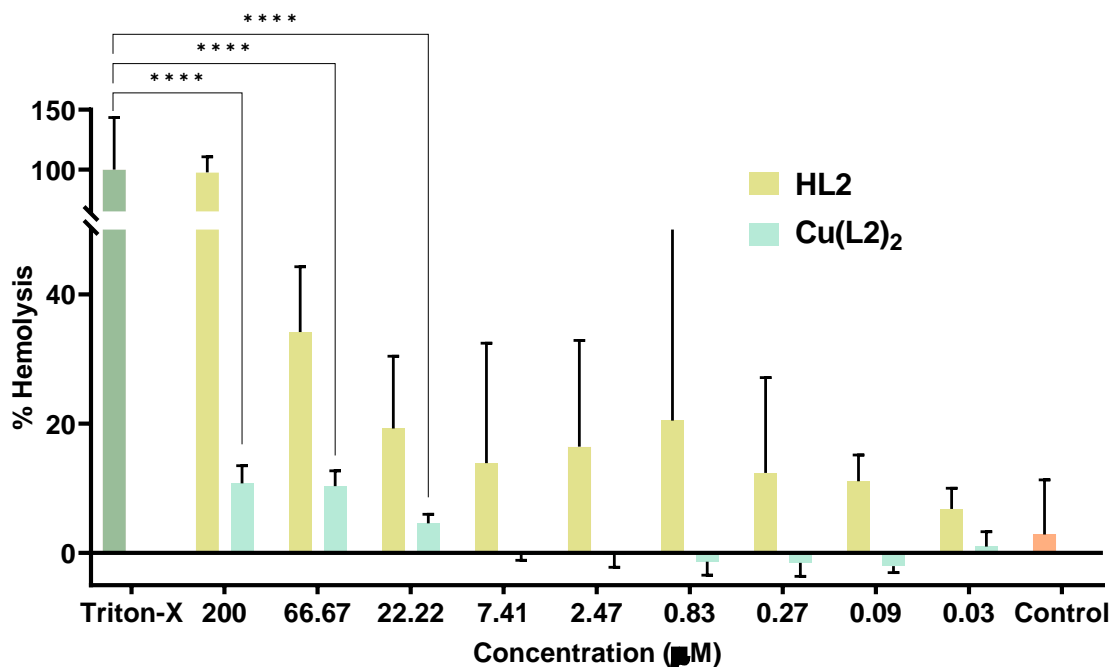

**Figure S33:** The experiment was performed in accordance with the guidelines of Institutional Animal Ethics Committee. Significance is denoted by asterisks from one-way ANOVA, \*\*\*\*P < 0.0001 versus control, nonsignificant analysis is not indicated.

**Combination Analysis:**

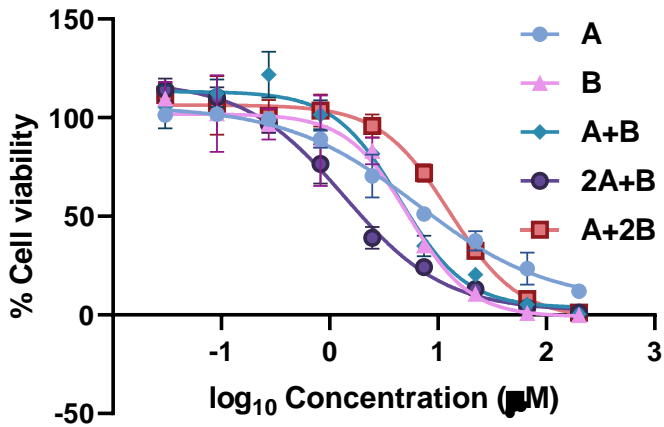

**Figure S34:** The combination analysis of the antiproliferative activity of the 1:1, 2:1 and 1:2 cisplatin/Cu(L<sub>2</sub>)<sub>2</sub> combinations against MCF-7 cells for 72 h and the cytotoxicity curve of corresponding combinations.

When the combination was Cisplatin : Cu(L<sub>2</sub>)<sub>2</sub> :: 1:1, the combination IC<sub>50</sub> value will be divided by 2. The Combination Index (CI) would be -

$$CI = \frac{D_{IC501}}{D1} + \frac{D_{IC502}}{D2}$$

$$CI = \frac{2.21}{6.39} + \frac{2.21}{5.32}$$

$$CI = 0.34 + 0.41$$

$$CI = 0.75$$

When the combination was Cisplatin : Cu(L<sub>2</sub>)<sub>2</sub> :: 2:1, the combination IC<sub>50</sub> value will be divided by 3. The Combination Index (CI) would be -

$$CI = \frac{2(D_{IC501})}{D1} + \frac{D_{IC502}}{D2}$$

$$CI = \frac{2(0.45)}{6.39} + \frac{0.45}{5.32}$$

$$CI = 0.141 + 0.085$$

$$CI = 0.226$$

When the combination was Cisplatin : Cu(L<sub>2</sub>)<sub>2</sub> :: 1:2, the combination IC<sub>50</sub> value will be divided by 3. The Combination Index (CI) would be -

$$CI = \frac{D_{IC501}}{D1} + \frac{2(D_{IC502})}{D2}$$

$$CI = \frac{4.24}{6.39} + \frac{2(0.42)}{5.32}$$

$$CI = 2.253$$



**Western Blot.** Cell and tissue protein extracts were prepared for western blotting. The protein mixtures were separated on SDS-PAGE gel (10%) and then transferred to a PVDF membrane (G-Biosciences, USA). Afterward, the membrane was blocked in 5% BSA for 1 h and incubated with primary antibodies [CST: PERK (D11A8) rabbit mAb #5683] overnight at 4 °C. The samples were subsequently incubated with  $\beta$ -actin antibody [CST:  $\beta$ -Actin (D6A8) rabbit mAb #8457] as a loading control. The membranes were washed three times (5 min each) with TBST and incubated for 2 h with a secondary antibody. After incubation, the membranes were washed again with TBST three times (5 min each) and visualized Supersignal™ West Pico Plus Chemiluminescent Substrate (Thermo scientific) and a chemiluminescence imaging machine (ChemiDoc Touch Imaging System, BioRad). The level of expression for each protein was analyzed using Bio-Rad Image Lab Software.

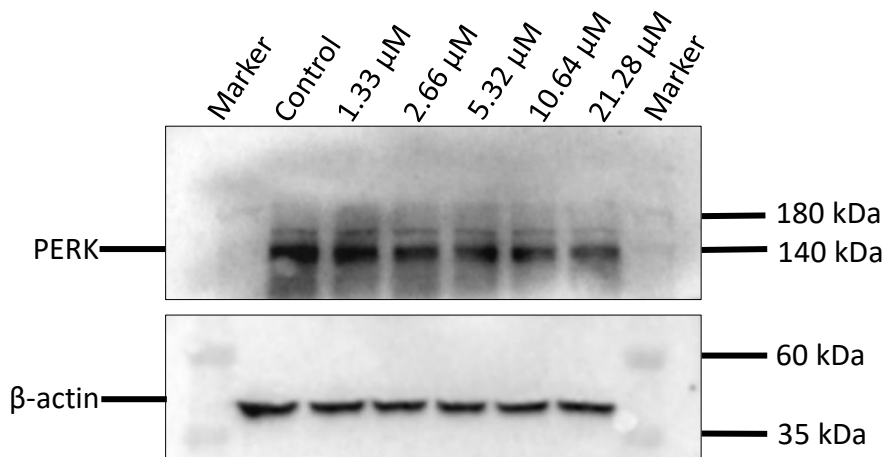

#### Cell Cycle Arrest:

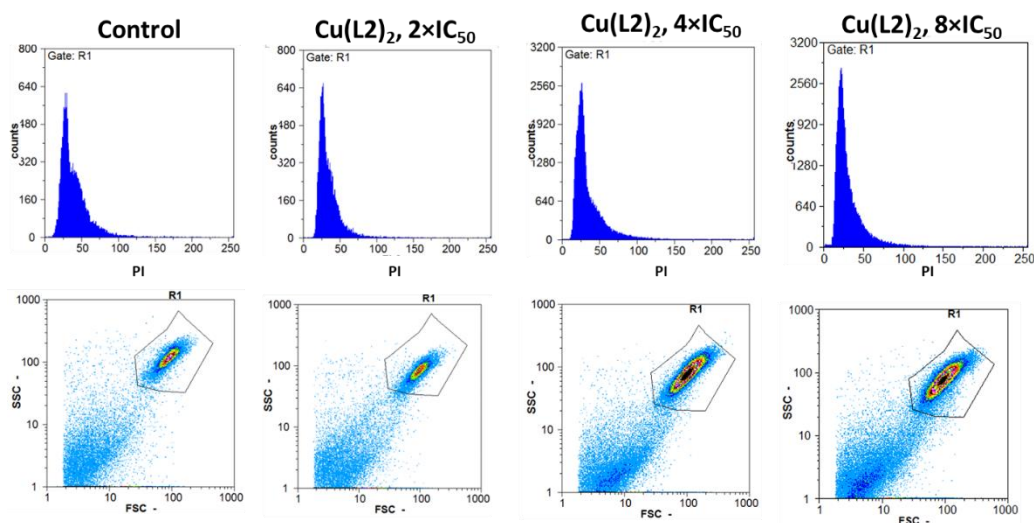

**Figure S35:** Cell cycle arrest: The MCF-7 cells were initially seeded and cultured overnight. Subsequently, they were treated with Cu(L2)<sub>2</sub> at varying concentrations of 10  $\mu$ M, 20  $\mu$ M, and 40  $\mu$ M for 24 hours. Following overnight incubation with ice ethanol, the cells were collected, subjected to centrifugation, washed, and subsequently incubated with a staining buffer solution containing PI/RNase for 30 min. Later, the flow cytometry technique was employed to calculate the change in MCF-7 cells arrested at distinct stages.

**Antimicrobial Activity:** The antibacterial activities of (HL1–HL8) and their corresponding Cu(L1)<sub>2</sub>–Cu(L8)<sub>2</sub> complexes were ascertained by the broth microdilution method according to CLSI guidelines. Staphylococcus aureus ATCC 29213 was inoculated to LB agar plate and cultured overnight at 37 °C. Single colonies from the agar plate were added to Muller Hinton Broth (MHB) medium and grown overnight at 37 °C with agitation (170 rpm). The overnight cell cultures were diluted and grown to the mid-log phase (OD 600: 0.4–0.6). This culture was then diluted to  $\sim 10^5$  CFU/mL in MHB medium. The prepared compounds were dissolved in DMSO to prepare the stock solutions, which were serially diluted two fold in 96- well plates in Mueller–Hinton broth. After that, 100  $\mu$ L of diluted



bacterial suspension was added to the 96-well plate containing 100  $\mu\text{L}$  of compound solution. The plates were then kept in incubator for 24 h at 37  $^{\circ}\text{C}$ . The MIC of the compounds that inhibited microbial growth was determined by recording the optical density at 600 nm using a microplate reader.

**Table S6: Antimicrobial Profile of HL1-HL8 and Cu(L1)<sub>2</sub> - Cu(L8)<sub>2</sub>**

| MIC ( $\mu\text{M}$ ) |                             |                     |                             |
|-----------------------|-----------------------------|---------------------|-----------------------------|
| Compounds             | <i>S. aureus</i> ATCC 29213 | Compounds           | <i>S. aureus</i> ATCC 29213 |
| HL1                   | 164.89                      | Cu(L1) <sub>2</sub> | 85.42                       |
| HL2                   | 154.13                      | Cu(L2) <sub>2</sub> | 65.74                       |
| HL3                   | 170.16                      | Cu(L3) <sub>2</sub> | 78.32                       |
| HL4                   | 152.36                      | Cu(L4) <sub>2</sub> | 70.85                       |
| HL5                   | 177.71                      | Cu(L5) <sub>2</sub> | 81.50                       |
| HL6                   | 23.38                       | Cu(L6) <sub>2</sub> | 76.17                       |
| HL7                   | 140.88                      | Cu(L7) <sub>2</sub> | 76.35                       |
| HL8                   | 154.88                      | Cu(L8) <sub>2</sub> | 71.79                       |
| Levofloxacin          | 0.69                        | Levofloxacin        | 0.69                        |

**Morphological Changes in *S. aureus* ATCC 29213 Observed by Atomic Force Microscope:** Bacterial samples for AFM measurements were prepared as described earlier.<sup>5-6</sup> The incubated culture of *S. aureus* ATCC 29213 was inoculated in Mueller–Hinton Broth to make OD600 (0.4-0.6). The cells were treated with 25 and 50  $\mu\text{M}$  HL6 for 1 and 4 h at 37  $^{\circ}\text{C}$  with shaking. Ampicillin (50  $\mu\text{g}/\text{mL}$ )-treated cells and untreated bacterial cells were used as the control. After incubation, the 1 mL of culture was centrifuged at 15000 rpm for 1 min, the cell pellet was washed twice with Milli-Q water. Then drop of dispersed pellet in Milli-Q water was taken on a glass slide. The glass slide was then air dried and stored under vacuum in a desiccator. After drying, these cells were characterized by Atomic Force Microscopy (AFM) in order to assess the integrity of cells.

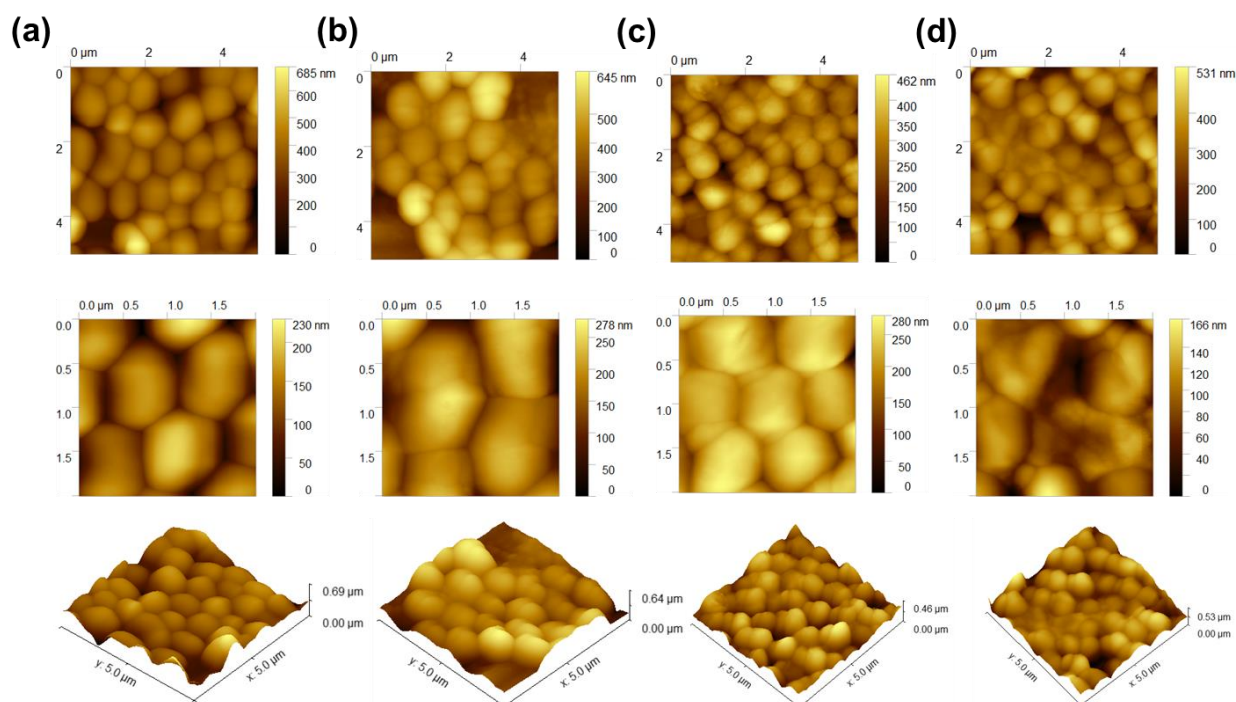

**Figure S36:** Atomic force microscopic images 2D topography (top two panel) and the corresponding 3D reconstructions (bottom panel) of *S. aureus* cells; (a) in the absence of drug treatment, showing typical round *S. aureus* cells with a smooth surface; (b) in the presence of treatment with 143.1  $\mu\text{M}$  ampicillin (positive control); (c-d) in the presence of treatment with 25 and 50  $\mu\text{M}$  HL6 respectively after 1 h; the treatment resulted in bacterial cell membrane damage with engraving and flat surface of *S. aureus* cells. The image was acquired in tapping mode using a scan size of 5 and 2  $\mu\text{m}$ .

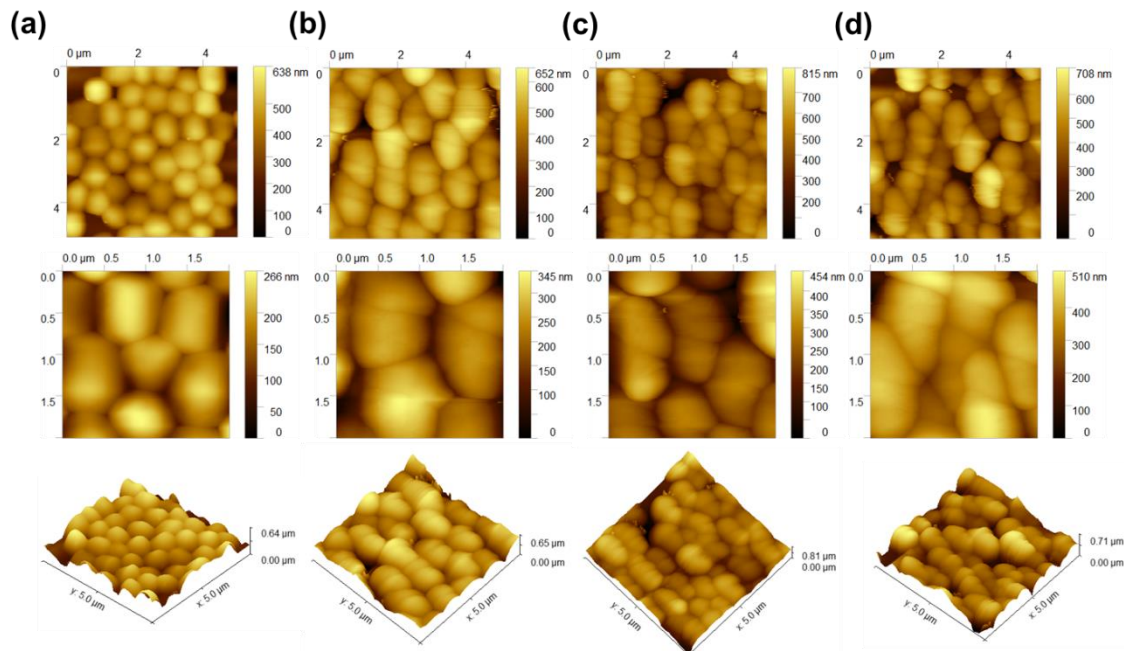

**Figure S37:** Atomic force microscopic images 2D topography (top two panel) and the corresponding 3D reconstructions (bottom panel) of *S. aureus* cells; (a) in the absence of drug treatment, showing typical round *S. aureus* cells with a smooth surface; (b) in the presence of treatment with 143.1  $\mu\text{M}$  ampicillin (positive control); (c-d) in the presence of treatment with 25 and 50  $\mu\text{M}$  HL6 respectively after 4 h; the treatment resulted in bacterial cell membrane damage with engraving and flat surface of *S. aureus* cells. The image was acquired in tapping mode using a scan size of 5 and 2  $\mu\text{m}$ .

#### Morphological Changes for *S. aureus* ATCC 29213 observed by SEM

Bacterial samples for SEM measurements were prepared as described earlier. Briefly, mid-logarithmic phase cells of *S. aureus* ATCC 29213 ( $\text{OD}_{600}$  0.4-0.6) were treated with 25, 50 and 100  $\mu\text{M}$  HL6 for 1 h and 4 h at 37  $^{\circ}\text{C}$  with shaking. Untreated bacterial cells and ampicillin (143.1  $\mu\text{M}$ )-treated cells were used as the control. After incubation, the 1 mL of culture was centrifuged at 15000 rpm for 1 min, the cell pellet was washed twice with 1x PBS buffer. Then drop of dispersed pellet in 1x PBS was taken on a pre-cleaned coverslip. The sample was air dried and then fixed with 2.5% glutaraldehyde for 60 min. Then the cells were again washed thrice with the same buffer and dehydrated sequentially with 30–100% ethanol for 10 min each. The coverslips were then dried under vacuum in a desiccator. Finally, the cells were coated with gold and viewed via a scanning electron microscope available at IITK.

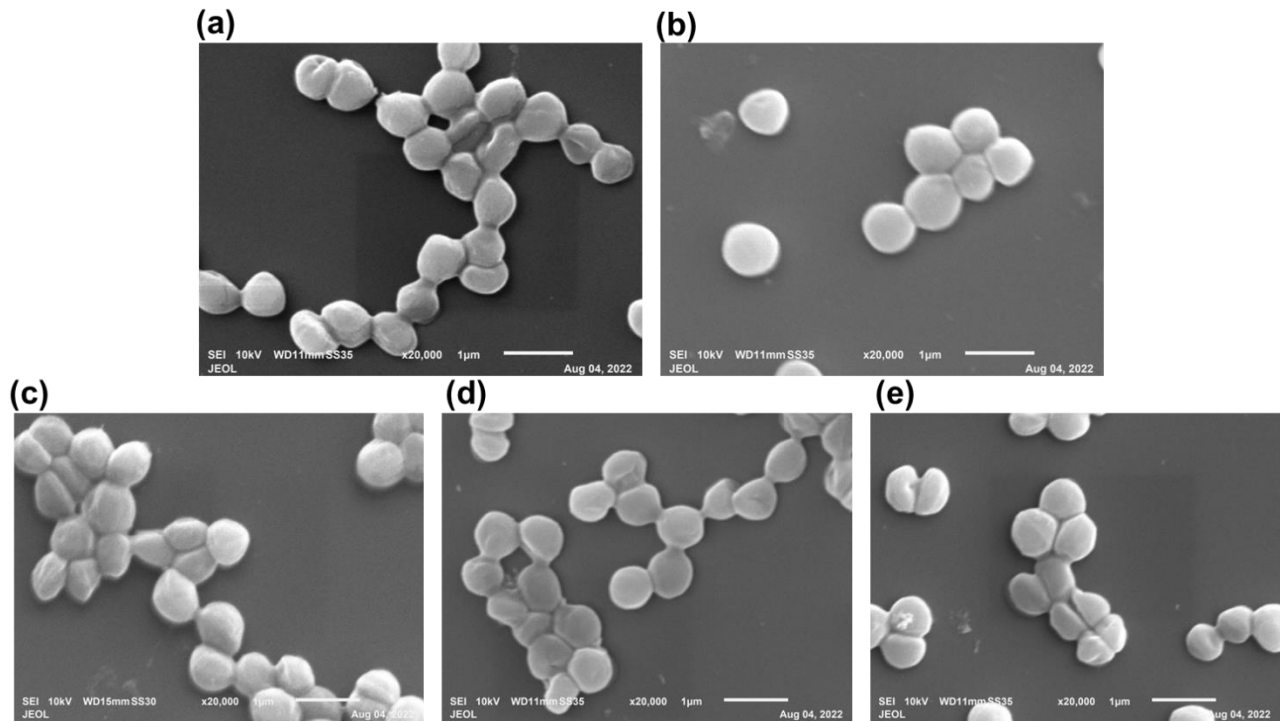

**Figure S38:** Scanning electron microscope images of *S. aureus* ATCC 29213 cells; (a) untreated cells showing smooth well-defined morphology; (b) treated cells with ampicillin (positive control) 143.1 μM respectively; (c-e) treated cells with HL6 25, 50 and 100 μM respectively after 1h; the treated *S. aureus* cells shows irregular shape fractured cells with cellular debris. Scale bar = 1 μm, magnification = 20 K.

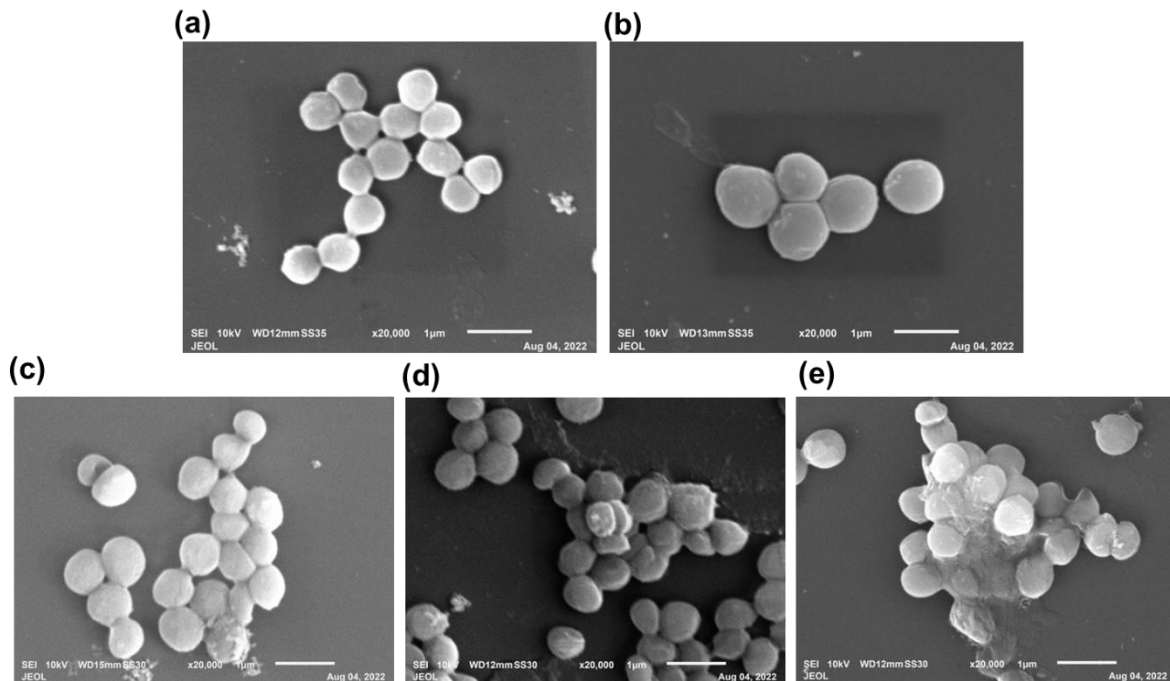

**Figure S39:** Scanning electron microscope images of *S. aureus* ATCC 29213 cells; (a) untreated cells showing smooth well-defined morphology; (b) treated cells with ampicillin (positive control) 143.1 μM respectively; (c-e) treated cells with HL6 25, 50 and 100 μM respectively after 4h; the treated *S. aureus* cells show irregular shape fractured cells with cellular debris. Scale bar = 1 μm, magnification = 20 K.

**Table S7:** The SMILES strings for the ligands (HL1 – HL8) and complexes Cu(L1)<sub>2</sub> – Cu(L8)<sub>2</sub>

| Compound            | SMILES                                                                                                                                                                          | MDA-MB-231  | MCF-7       | HCT-116     | A549       | HEK-293    |
|---------------------|---------------------------------------------------------------------------------------------------------------------------------------------------------------------------------|-------------|-------------|-------------|------------|------------|
| HL1                 | <chem>O=C(N([H])[C@@H](C1=CC=CC=C1)C(C=CC=C2)=C2/N=C/C3=CC=CC=C3O</chem>                                                                                                        | > 100       | 95.4 ± 20.0 | > 100       | > 100      | 14.9 ± 7.9 |
| HL2                 | <chem>O=C(N([H])[C@@H](C1=CC=CC=C1)C(C=CC=C2)=C2/N=C/C3=CC(C(C)C)C=CC(C(C)C)C=C3O</chem>                                                                                        | 13.2 ± 3.9  | 10.7 ± 2.7  | 8.1 ± 1.4   | 18.2 ± 0.7 | 18.6 ± 1.6 |
| HL3                 | <chem>O=C(N([H])[C@@H](C1=CC=CC=C1)C(C=CC=C2)=C2/N=C/C3=CC(Cl)=CC=C3O</chem>                                                                                                    | 39.5 ± 43.0 | 39.8 ± 43.0 | 45.8 ± 7.0  | 45.5 ± 1.1 | > 100      |
| HL4                 | <chem>O=C(N([H])[C@@H](C1=CC=CC=C1)C(C=CC=C2)=C2/N=C/C3=CC(Br)=CC=C3O</chem>                                                                                                    | 73.4 ± 7.0  | 73.1 ± 7.0  | 44.3 ± 2.5  | > 100      | > 100      |
| HL5                 | <chem>O=C(N([H])[C@@H](C1=CC=CC=C1)C(C=CC=C2)=C2/N=C/C3=CC(F)=CC=C3O</chem>                                                                                                     | 33.8 ± 36.4 | 34.2 ± 36.0 | 51.3 ± 27.9 | 95.9 ± 3.7 | 88.1 ± 9.5 |
| HL6                 | <chem>O=C(N([H])[C@@H](C1=CC=CC=C1)C(C=CC=C2)=C2/N=C/C3=CC([N+](O-))=O)=CC=C3O</chem>                                                                                           | > 100       | > 100       | > 100       | > 100      | > 100      |
| HL7                 | <chem>O=C(N([H])[C@@H](C1=CC=CC=C1)C(C=CC=C2)=C2/N=C/C3=CC(C(O)=O)=CC=C3O</chem>                                                                                                | > 100       | > 100       | > 100       | > 100      | > 100      |
| HL8                 | <chem>O=C(N([H])[C@@H](C1=CC=CC=C1)C(C=CC=C2)=C2/N=C/C3=CC=C(N(CC)CC)C=C3O</chem>                                                                                               | 50.1 ± 0.0  | 13.4 ± 6.0  | > 100       | > 100      | > 100      |
| Cu(L1) <sub>2</sub> | <chem>[H]N([C@@H](C1=CC=CC=C1)C)C2=O[Cu]34([N](C5=C(C(N([H])[C@@H](C6=CC=CC=C6)C)=O)C=CC=C5)=CC7=CC=CC=C7O4)OC8=CC=CC=C8C=[N]3C9=C2C=CC=C9</chem>                               | > 100       | 25.9 ± 0.6  | 27.6 ± 0.8  | 43.4 ± 1.3 | > 100      |
| Cu(L2) <sub>2</sub> | <chem>[H]N([C@@H](C1=CC=CC=C1)C)C2=O[Cu]34([N](C5=C(C(N([H])[C@@H](C6=CC=CC=C6)C)=O)C=CC=C5)=CC7=CC(C(C)C)C=CC(C(C)C)C=C7O4)OC8=C(C(C)C)C=C(C(C)C)C=C8C=[N]3C9=C2C=CC=C9</chem> | 8.1 ± 0.4   | 5.3 ± 0.7   | 9.1 ± 1.4   | 9.4 ± 4.2  | 17.6 ± 1.7 |
| Cu(L3) <sub>2</sub> | <chem>[H]N([C@@H](C1=CC=CC=C1)C)C2=O[Cu]34([N](C5=C(C(N([H])[C@@H](C6=CC=CC=C6)C)=O)C=CC=C5)=CC7=CC(Cl)=CC=C7O4)OC8=CC=C(Cl)C=C8C=[N]3C9=C2C=CC=C9</chem>                       | 14.6 ± 1.3  | 15.4 ± 0.9  | 27.3 ± 0.6  | 30.0 ± 1.4 | 7.4 ± 0.1  |
| Cu(L4) <sub>2</sub> | <chem>[H]N([C@@H](C1=CC=CC=C1)C)C2=O[Cu]34([N](C5=C(C(N([H])[C@@H](C6=CC=CC=C6)C)=O)C=CC=C5)=CC7=CC(Br)=CC=C7O4</chem>                                                          | 22.7 ± 1.1  | 14.5 ± 0.4  | 11.4 ± 1.2  | 26.8 ± 2.3 | 9.5 ± 1.3  |

|                     |                                                                                                                                                                   |             |            |            |            |            |
|---------------------|-------------------------------------------------------------------------------------------------------------------------------------------------------------------|-------------|------------|------------|------------|------------|
|                     | )OC8=CC=C(Br)C=C8C=[N]<br>]3C9=C2C=CC=C9                                                                                                                          |             |            |            |            |            |
| Cu(L5) <sub>2</sub> | [H]N([C@@H](C1=CC=CC=C1)C)C2=O[Cu]34([N](C5=C(C(N([H])[C@@H](C6=CC=CC=C6)C)=O)C=CC=C5)=CC7=CC(F)=CC=C7O4)OC8=CC=C(F)C=C8C=[N]3C9=C2C=CC=C9                        | 28.0 ± 1.5  | 29.5 ± 4.6 | 27.3 ± 2.5 | 52.7 ± 1.4 | 21.4 ± 5.3 |
| Cu(L6) <sub>2</sub> | [H]N([C@@H](C1=CC=CC=C1)C)C2=O[Cu]34([N](C5=C(C(N([H])[C@@H](C6=CC=CC=C6)C)=O)C=CC=C5)=CC7=CC([N+][[O-]])=O)CC=C7O4)OC8=CC=C([N+][[O-]])=O)C=C8C=[N]3C9=C2C=CC=C9 | 9.0 ± 2.0   | 17.9 ± 2.9 | 13.3 ± 1.2 | 13.5 ± 1.4 | 12.0 ± 0.4 |
| Cu(L7) <sub>2</sub> | [H]N([C@@H](C1=CC=CC=C1)C)C2=O[Cu]34([N](C5=C(C(N([H])[C@@H](C6=CC=CC=C6)C)=O)C=CC=C5)=CC7=CC(C(O)=O)=CC=C7O4)OC8=CC=C(C(O)=O)C=C8C=[N]3C9=C2C=CC=C9              | 26.9 ± 21.9 | 59.9 ± 4.9 | > 100      | > 100      | > 100      |
| Cu(L8) <sub>2</sub> | [H]N([C@@H](C1=CC=CC=C1)C)C2=O[Cu]34([N](C5=C(C(N([H])[C@@H](C6=CC=CC=C6)C)=O)C=CC=C5)=CC7=CC=C(N(CC)CC)C=C7O4)OC8=CC(N(CC)CC)=CC=C8C=[N]3C9=C2C=C=C9             | 17.9 ± 0.7  | 17.3 ± 1.2 | 22.4 ± 6.6 | 28.9 ± 1.4 | 27.2 ± 2.6 |

**Table S8: Table S8: 50% Inhibitory concentrations (IC<sub>50</sub>, μM) of HL1–HL8 and (Cu(L1)<sub>2</sub>–Cu(L8)<sub>2</sub> in comparison with the FDA approved cisplatin determined by the resazurin assay after incubation for 72 h.**

| Compounds           | MDA-MB-231  | MCF-7       | HCT-116     | A549       | HEK-293    |
|---------------------|-------------|-------------|-------------|------------|------------|
| HL1                 | >100        | 95.4 ± 20.0 | >100        | >100       | 14.9 ± 7.9 |
| HL2                 | 13.2 ± 3.9  | 10.7 ± 2.7  | 8.1 ± 1.4   | 18.2 ± 0.7 | 18.6 ± 1.6 |
| HL3                 | 39.5 ± 43.0 | 39.8 ± 43.0 | 45.8 ± 7.0  | 45.5 ± 1.1 | >100       |
| HL4                 | 73.4 ± 7.0  | 73.1 ± 7.0  | 44.3 ± 2.5  | >100       | >100       |
| HL5                 | 33.8 ± 36.4 | 34.2 ± 36.0 | 51.3 ± 27.9 | 95.9 ± 3.7 | 88.1 ± 9.5 |
| HL6                 | >100        | >100        | >100        | >100       | >100       |
| HL7                 | >100        | >100        | >100        | >100       | >100       |
| HL8                 | 50.1 ± 0.0  | 13.4 ± 6.0  | >100        | >100       | >100       |
| Cu(L1) <sub>2</sub> | >100        | 25.9 ± 0.6  | 27.6 ± 0.8  | 43.4 ± 1.3 | >100       |
| Cu(L2) <sub>2</sub> | 8.1 ± 0.4   | 5.3 ± 0.7   | 9.1 ± 1.4   | 9.4 ± 4.2  | 17.6 ± 1.7 |
| Cu(L3) <sub>2</sub> | 14.6 ± 1.3  | 15.4 ± 0.9  | 27.3 ± 0.6  | 30.0 ± 1.4 | 7.4 ± 0.1  |
| Cu(L4) <sub>2</sub> | 22.7 ± 1.1  | 14.5 ± 0.4  | 11.4 ± 1.2  | 26.8 ± 2.3 | 9.5 ± 1.3  |
| Cu(L5) <sub>2</sub> | 28.0 ± 1.5  | 29.5 ± 4.6  | 27.3 ± 2.5  | 52.7 ± 1.4 | 21.4 ± 5.3 |
| Cu(L6) <sub>2</sub> | 9.0 ± 2.0   | 17.9 ± 2.9  | 13.3 ± 1.2  | 13.5 ± 1.4 | 12.0 ± 0.4 |
| Cu(L7) <sub>2</sub> | 26.9 ± 21.9 | 59.9 ± 4.9  | >100        | >100       | >100       |
| Cu(L8) <sub>2</sub> | 17.9 ± 0.7  | 17.3 ± 1.2  | 22.4 ± 6.6  | 28.9 ± 1.4 | 27.2 ± 2.6 |
| Cisplatin           | 1.9 ± 0.1   | 6.4 ± 1.6   | 6.2 ± 0.1   | 4.1 ± 0.1  | 4.3 ± 0.1  |

## References

1. X. R. Zhou, Y. Liu, Z. T. Huang, Q. X. Yao, F. F. He and Y. Gao, *Bioconjug. Chem.*, 2021, **32**, 106-110
2. A. L. Shi, D. F. Wang, H. Wang, Y. Wu, H. Q. Tian, Q. Guan, K. Bao and W. G. Zhang, *RSC Adv.*, 2016, **6**, 114879-114888.
3. J. N. Liu, W. Q. Tang, L. Sheng, Z. Du, T. Zhang, X. Su and S. X. A. Zhang, *Chem. Asian J.*, 2019, **14**, 438-445.
4. T. Saha, P. Kumar, N. Sepay, D. Ganguly, K. Tiwari, K. Mukhopadhyay and S. Das, *Acs Omega*, 2020, **5**, 16342-16357.
5. S. Ali, S. Perveen, M. Ali, M.R. Shah, E. Khan, A.S. Sharma, H. Li, Q. Chen. *J. Clust. Sci.* 2019, **31**, 811–821.
6. R. Niranjana, S. Zafar, B. Lochab and R. Priyadarshini, *Nanomater.*, 2022, **12**, 191-209.
7. K. Sakthikumar, R. V. Solomon and J. D. Raja, *RSC Adv.*, 2019, **9**, 14220-14241.
8. I. Warad, H. Suboh, N. Al-Zaqri, A. Alsalmeh, F. A. Alharthi, M. M. Aljohani and A. Zarrouk, *RSC Adv.*, 2020, **10**, 21806-21821.
