# Supplementary figures and images for: Concurrent Cu(ii)-initiated Fenton-like reaction and glutathione depletion to escalate chemodynamic therapy
Source: Royal Society of Chemistry journal article supplement (doi:10.1039/d3cc04519f), 2023-01-01

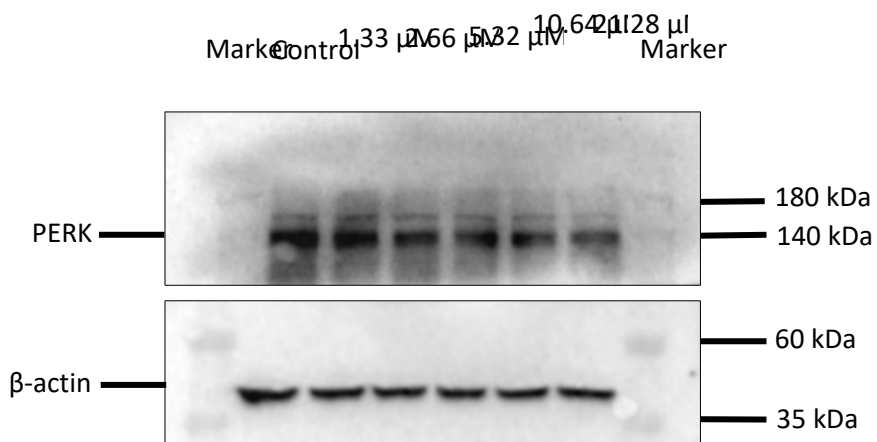

$\beta$ -actin ladder image

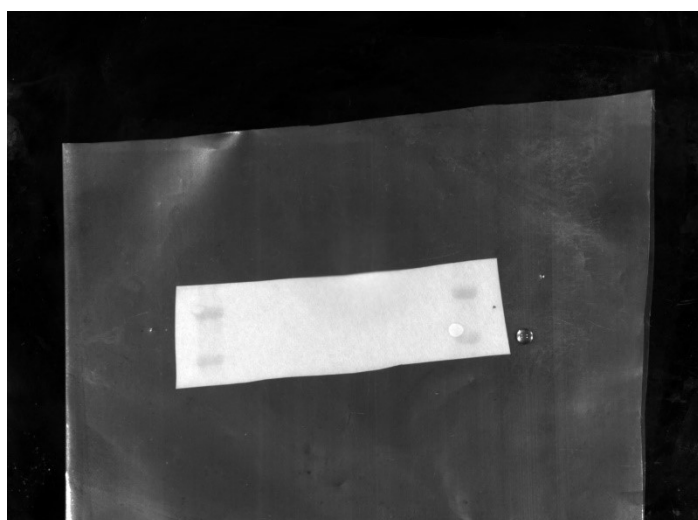

$\beta$ -actin image

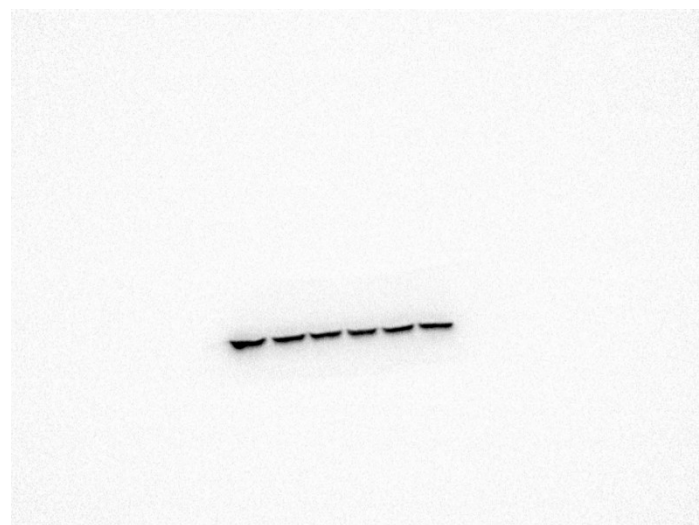

PERK ladder

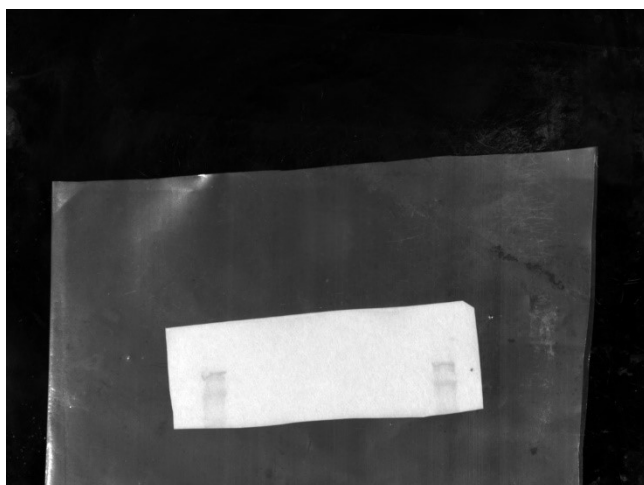

PERK

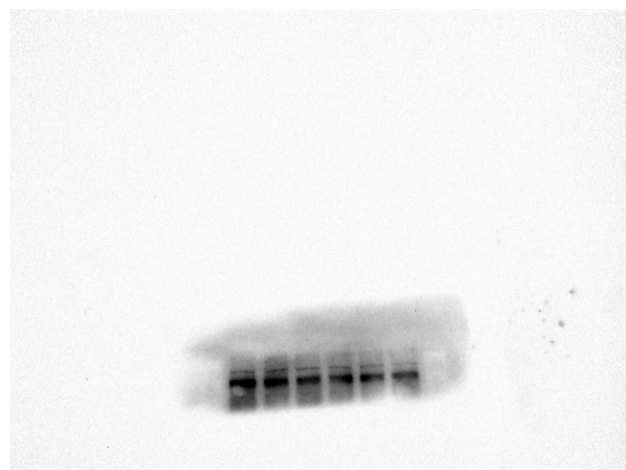

Supplement: d3cc04519f2.pdf [file d3cc04519f2.pdf]
